# Supplementary material for: NMR Hydrophilic Metabolomic Analysis of Bacterial Resistance Pathways Using Multivalent Antimicrobials with Challenged and Unchallenged Wild Type and Mutated Gram-Positive Bacteria
Source: MDPI journal article supplement (doi:10.3390/ijms222413606), 2021-12-19
Supplement: s1 [file s1]

## ***Supplementary Material***

### **NMR Hydrophilic Metabolomic Analysis of Bacterial Resistance Pathways using Multivalent Antimicrobials with Challenged and Unchallenged Wild Type and Mutated Gram-Positive Bacteria**

**Michelle L. Aries and Mary J. Cloninger**

**Department of Chemistry and Biochemistry, Montana State University, Bozeman, MT, 59717 USA, [mcloninger@montana.edu](mailto:mcloninger@montana.edu)**

#### **Table of Contents**

|                                                                  |               |
|------------------------------------------------------------------|---------------|
| Detailed Methods Description                                     | Pages S2-S4   |
| Growth Curve                                                     | Page S4       |
| Sample NMR Spectra                                               | Page S4       |
| Table S1 Significant Metabolites Identified                      | Page S5       |
| Hierarchical Clustering                                          | Pages S6      |
| Ortho PLS-DA                                                     | Pages S7      |
| PCA                                                              | Pages S8      |
| 3D sPLS-DA                                                       | Pages S9      |
| Volcano Plots                                                    | Pages S10-S11 |
| VIP Plots                                                        | Pages S12-S14 |
| Challenged Mutant versus Unchallenged Wild Type Tables S2 and S3 | Pages S15-S16 |
| Pattern Hunter Metabolite Correlations                           | Pages S17-S33 |
| Pathway Analysis Plots                                           | Pages S34-S40 |
| Box Plots                                                        | Page S40-S62  |
| References                                                       | Page S63      |

## Procedures

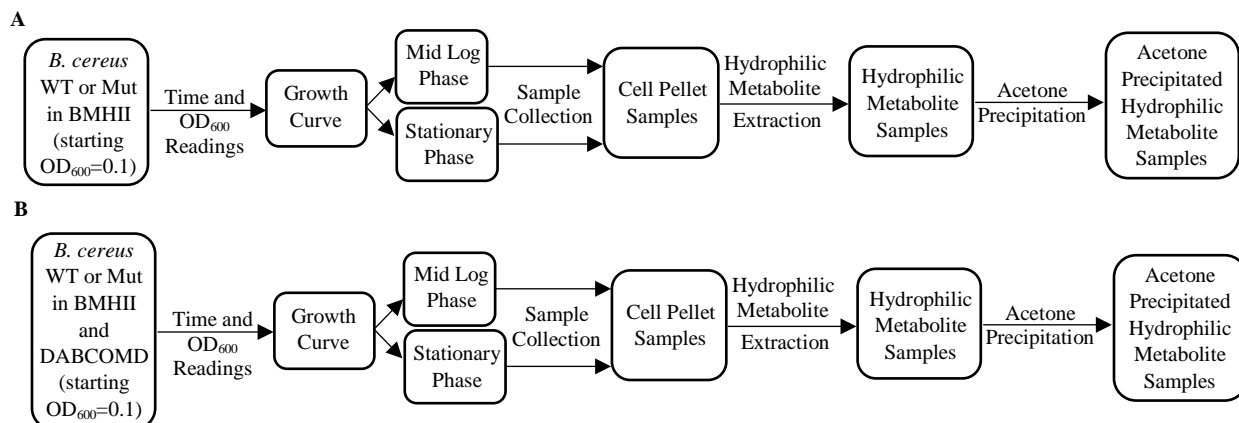

**Figure S1.** Procedure overview. Overview of the start of the cultures to the hydrophilic metabolite samples ready to be pelleted and frozen at  $-80^{\circ}\text{C}$  then put into NMR buffer. (a) unchallenged sample procedures (b) challenged sample procedures.

### Preparation and Sterilization of Media

Growth media (1 L) was prepared by adding 22 g of Brodo Mueller Hinton II Media (BMHII) and filling to 1 L with Millipore water in a 2 L Erlenmeyer flask, which was capped with aluminum foil with a strip of autoclave tape. The media was heated and stirred until homogeneous with a stir bar on a hot plate for 10-15 minutes, then autoclaved. Sterile methods were used whenever the aluminum foil lid was removed.

### Sterile Technique

The autoclave was used on all supplies and solutions that needed to be sterilized and could withstand the autoclave. The door in the hood was never raised more than a foot. The hood, all equipment and supplies, my gloves and lab coat sleeves were sprayed down with 70% ethanol. No lids were removed until after the ethanol dried, only when necessary and for as short of a time as possible. A Bunsen burner was lit, and the rim of each flask was passed through the flame before and after any pouring occurred.

### Overnight Culture Preparation

In a 250 mL Erlenmeyer flask, 80 mL of the already prepared and sterilized BMHII media was poured using sterile technique. Frozen stock and mutated *B. cereus* samples were kept on ice while separate sterile pipette tips were used to scrape the frozen bacterial stock. The pipette tips with frozen bacterial stock were ejected into separate media filled 250 mL Erlenmeyer flasks. These flasks were put in an incubator at  $37^{\circ}\text{C}$  with 250 revolutions per minute (rpms) overnight.

### Starting the Culture

The overnight cultures were cloudy and used to start the sample cultures. Sterile technique was used to add 500 mL of sterile BMHII media to each 1 L flask, and overnight culture was added until the optical density at 600 nm (OD<sub>600</sub>) reached 0.1. After each flask's OD<sub>600</sub> was brought up 0.1, they were placed back into the  $37^{\circ}\text{C}$  incubator at 250 rpms.

### **OD<sub>600</sub> Readings**

A blank was created by filling a capped cuvette with sterile media. Sterile media (0.20 mL) and 0.80 mL of sterile Millipore water was used to create a 1:5 dilution blank. The OD<sub>600</sub> readings were conducted on a SpectraMax plus<sup>®</sup> SoftMax Pro 5<sup>®</sup> Molecular Devices Spectrometer set to 600 nm wavelength. Before any cuvette was placed into the spectrometer, it was wiped down with a Kimwipe. A blank spectrum was acquired prior to running a sample cuvette filled with 1 mL of culture. The OD<sub>600</sub> was recorded and plotted versus time (min) to generate the sample growth plots.

### **Culture Growth**

All cultures were kept in the 37 °C incubator at 250 rpms, exception during sample collection. To generate the growth plot and track individual sample progress, the OD<sub>600</sub> was taken every half of an hour for the first few cultures and every hour for the last few cultures of every sample type grown. When the sample's OD<sub>600</sub> was going to be greater than 1, a 1:5 dilution of all samples was enacted in the OD cuvettes to keep them in the linear phase. Sample collection was conducted in the mid log (half of the ending OD<sub>600</sub>) and stationary phases. After the stationary phase samples were collected, the cultures were left overnight and the OD<sub>600</sub> was taken again, to ensure that the OD<sub>600</sub> did not increase and that the cultures were in stationary phase the night before.

### **Sample Collection**

Samples were collected in the mid log phase (half the ending OD<sub>600</sub>) and the stationary phase. Two 150 mL aliquots per culture were combined to form one sample. Screw-cap conical centrifuge tubes were used to centrifuge the samples at 2,500 rpms for 12 minutes. The supernatant was discarded, and the cell pellets were washed with 15 mL of cold sterile 1x PBS. The samples were transferred to glass centrifuge tubes. A 1:10 dilution was used to obtain OD<sub>600</sub> readings of for each sample. They were centrifuged at 2,500 rpms for 12 minutes for the wild type samples, and for 24 minutes for the mutant samples, since it took longer for the mutant samples to centrifuge down.

### **Dry Mass Measurements**

At an OD<sub>600</sub> of 1, 25 mL of sample culture was collected. They were centrifuged at 2500 rpms for 25 minutes and the supernatant was discarded. The cell pellets were rinsed with 5 mL of sterile 1x PBS and vortexed, then centrifuged at 2500 rpms for 25 minutes. The supernatant was discarded, and the cell pellet was scraped onto a sterile and pre-massed watch glass. The watch glasses were placed in the oven at 100 °C for 10 hours. The masses of the dried samples were obtained. (Aries and Cloninger 2020; Wang)

### **Colony Forming Units (CFUs)**

An YTP Agar solution was created from 4 g yeast extract, 8 g tryptone, 8 g glucose, 6.4 g agar and 400 mL Millipore water. After the solution was boiled, it was poured into petri dishes. A glass test tube labeled A contained 9.9 mL of sterile PBS and 100 µL of culture and was gently mixed with a pipette tip. A glass test tube labeled B contained 9 mL of sterile PBS and 1 mL from test tube A and was gently mixed with a pipette tip. A glass test tube labeled C contained 9 mL of sterile PBS and 1 mL from test tube B and was gently mixed with a pipette tip. A glass

test tube labeled D contained 9 mL of sterile PBS and 1 mL from test tube C and was gently mixed with a pipette tip. A 100  $\mu$ L aliquot was taken from test tube D and pipetted onto an agar plate and a bacterial spreader was used. This was repeated nine times per sample type. The agar plates were incubated at 37 °C for 24 hours. Each plate was divided into sections and the CFUs were counted. The number of CFUs per milliliter was calculated. (Aries and Cloninger 2020; Wang; Ammons et al. 2014 and references therein)

## Data

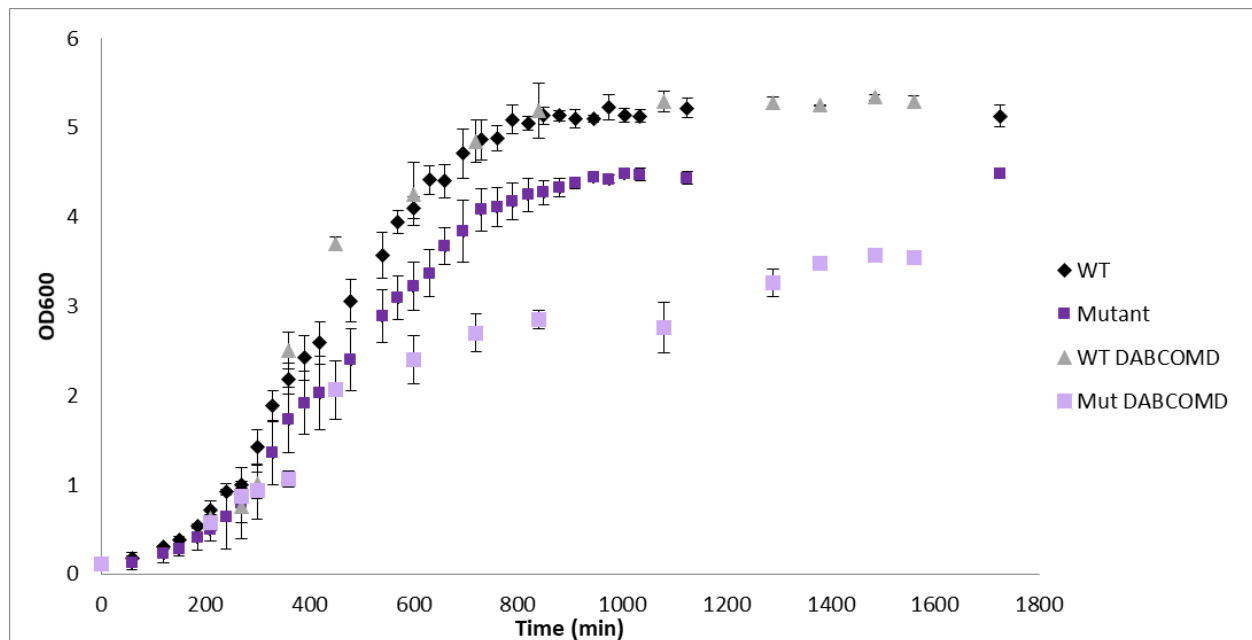

**Figure S2.** Growth Plot of Wild Type, DABCOMD Mutated *B. cereus*, DABCOMD challenged Wild Type and DABCOMD challenged DABCOMD Mutated *B. cereus*. The challenged groups are labeled with DABCOMD after the sample type.

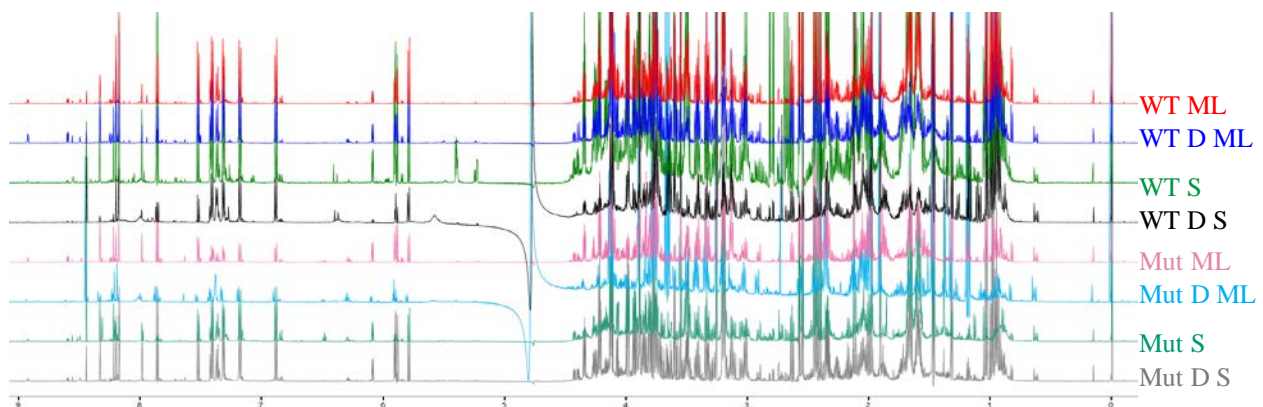

**Figure S3.** Spectra for each of the 8 sample types.

**Table S1.** All Metabolites Identified using the Chenomx NMR Suite 8.4 Software Profiling Program and Metabolite Library

| All Identified Metabolites | CAS #      |
|----------------------------|------------|
| Acetate                    | 71-50-1    |
| Acetoacetate               | 541-50-4   |
| Adenine                    | 73-24-5    |
| Adenosine                  | 58-61-7    |
| Alanine                    | 56-41-7    |
| AMP                        | 61-19-8    |
| Aspartate                  | 56-84-8    |
| Betaine                    | 107-43-7   |
| Cystathionine              | 56-88-2    |
| Cysteine                   | 54-90-4    |
| Formate                    | 141-53-7   |
| Fucose                     | 2438-80-4  |
| Fumarate                   | 142-42-7   |
| Glutamate                  | 56-86-0    |
| Glutamine                  | 56-85-9    |
| Glycine                    | 56-40-6    |
| Histidine                  | 71-00-1    |
| Homocysteine               | 6027-13-0  |
| Isocitrate                 | 320-77-4   |
| Isoleucine                 | 73-32-5    |
| Lactate                    | 50-21-5    |
| Leucine                    | 61-90-5    |
| Lysine                     | 56-87-1    |
| Methionine                 | 59-51-8    |
| N-Acetylglucosamine        | 7512-17-6  |
| NAD+                       | 53-84-9    |
| Phenylalanine              | 63-91-2    |
| Proline                    | 609-36-9   |
| Pyroglutamate              | 28874-51-3 |
| Pyruvate                   | 127-17-3   |
| Serine                     | 302-84-1   |
| Succinate                  | 110-15-6   |
| Tyrosine                   | 60-18-4    |
| UDP-glucose                | 133-89-1   |
| Uracil                     | 66-22-8    |
| Uridine                    | 58-96-8    |
| Valine                     | 72-18-4    |

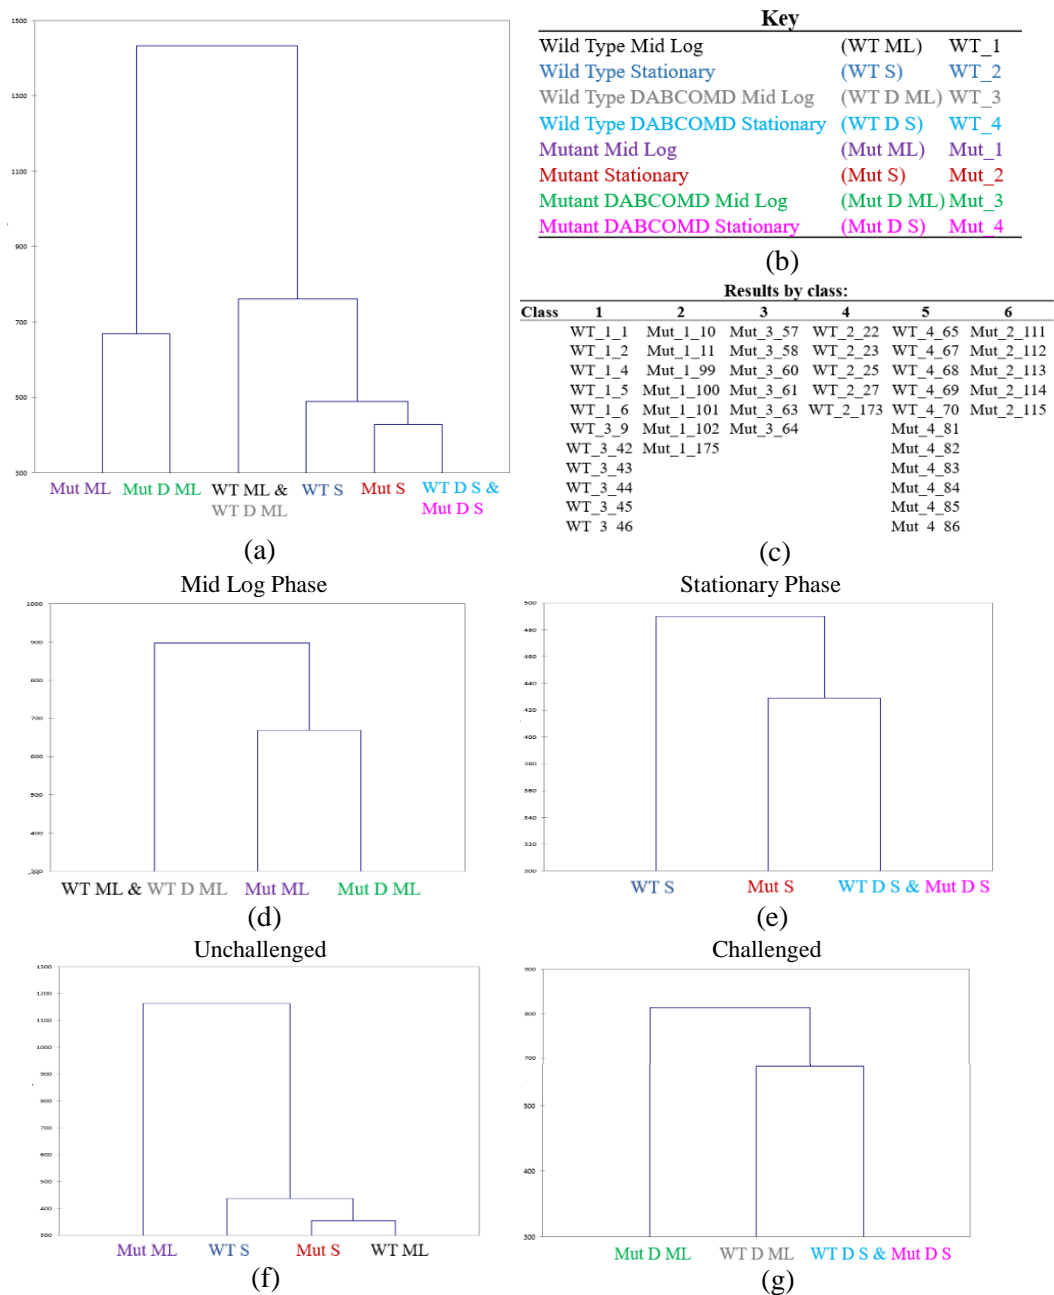

**Figure S4.** (a) Hierarchical Clustering of all sample types showing that WT ML and WT D ML cluster together, WT D S and Mut D S cluster together and all other sample types separate. (b) Sample abbreviation key. (c) Resulting classification of all input data showing the clustering of each individual sample. (d) Hierarchical Clustering of mid log phase samples showing that WT ML and WT D ML cluster together, and all other sample types separate. (e) Hierarchical Clustering of stationary phase samples showing that WT D S and Mut D S cluster together, and all other sample types separate. (f) Hierarchical Clustering of unchallenged sample types showing complete separation of sample types. (g) Hierarchical Clustering of DABCOMD challenged samples showing that the stationary phases cluster together, while the mid log phases separate.

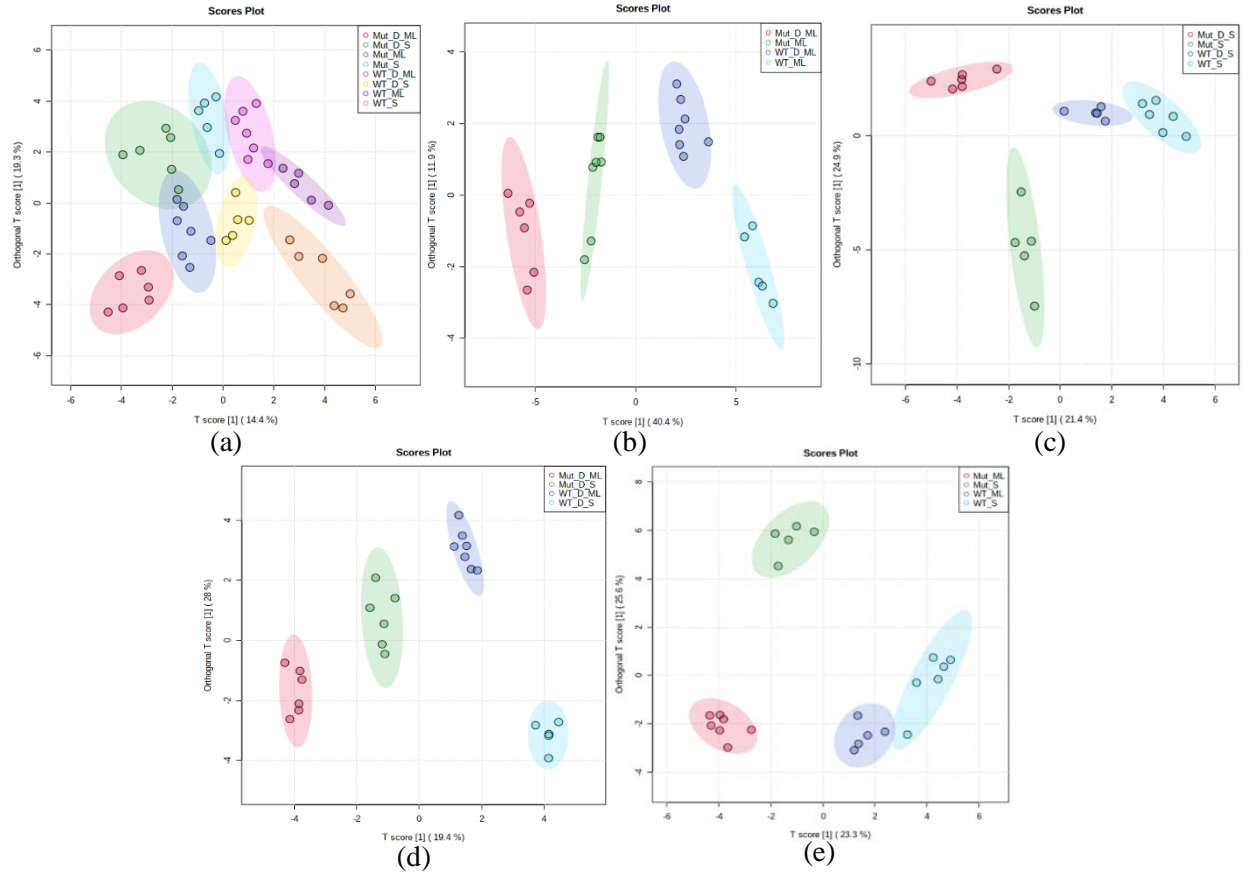

**Figure S5.** 2D ortho PLS-DA (a) Contains all sample types: demonstrates the greatest degree of separation with all sample types together, with only an overlap of the oval of WT ML with the oval of WT D ML, and a overlap of the oval of Mut D S with the ovals of WT S and Mut ML. (b-e) demonstrates complete separation of all sample types: (b) mid log phase samples. (c) stationary phase samples. (d) DABCOMD challenged samples. (e) unchallenged samples.

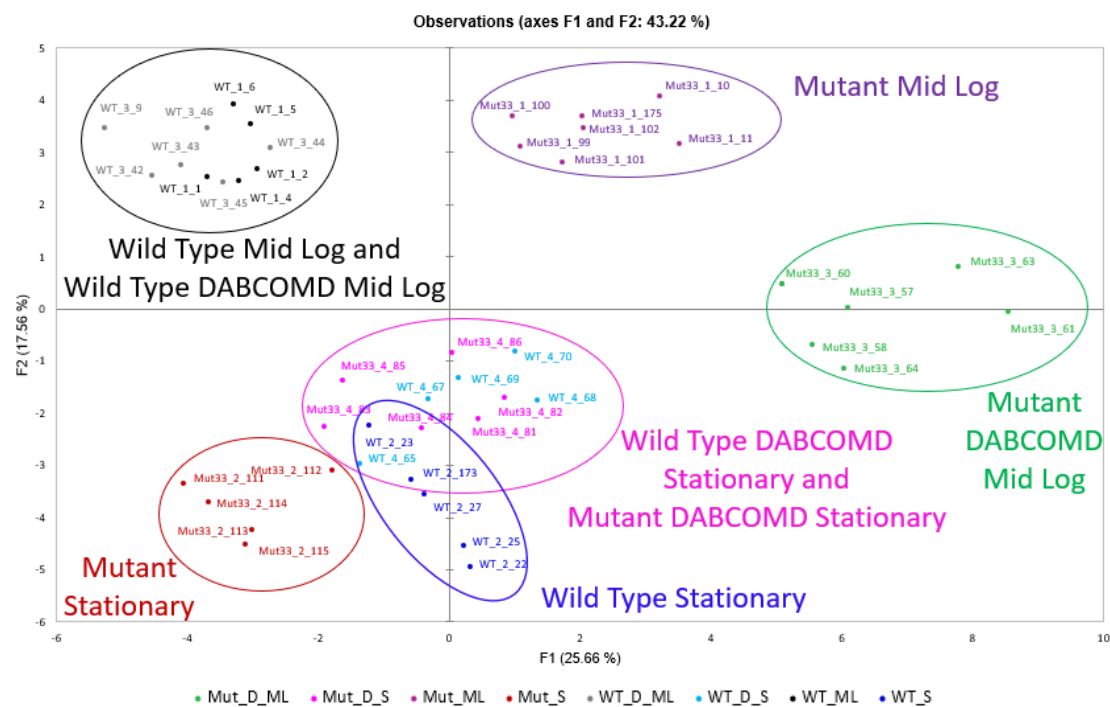

**Figure S6.** PCA plot showing the distribution of all sample types with sample labels corresponding to those listed in Figure S4c.



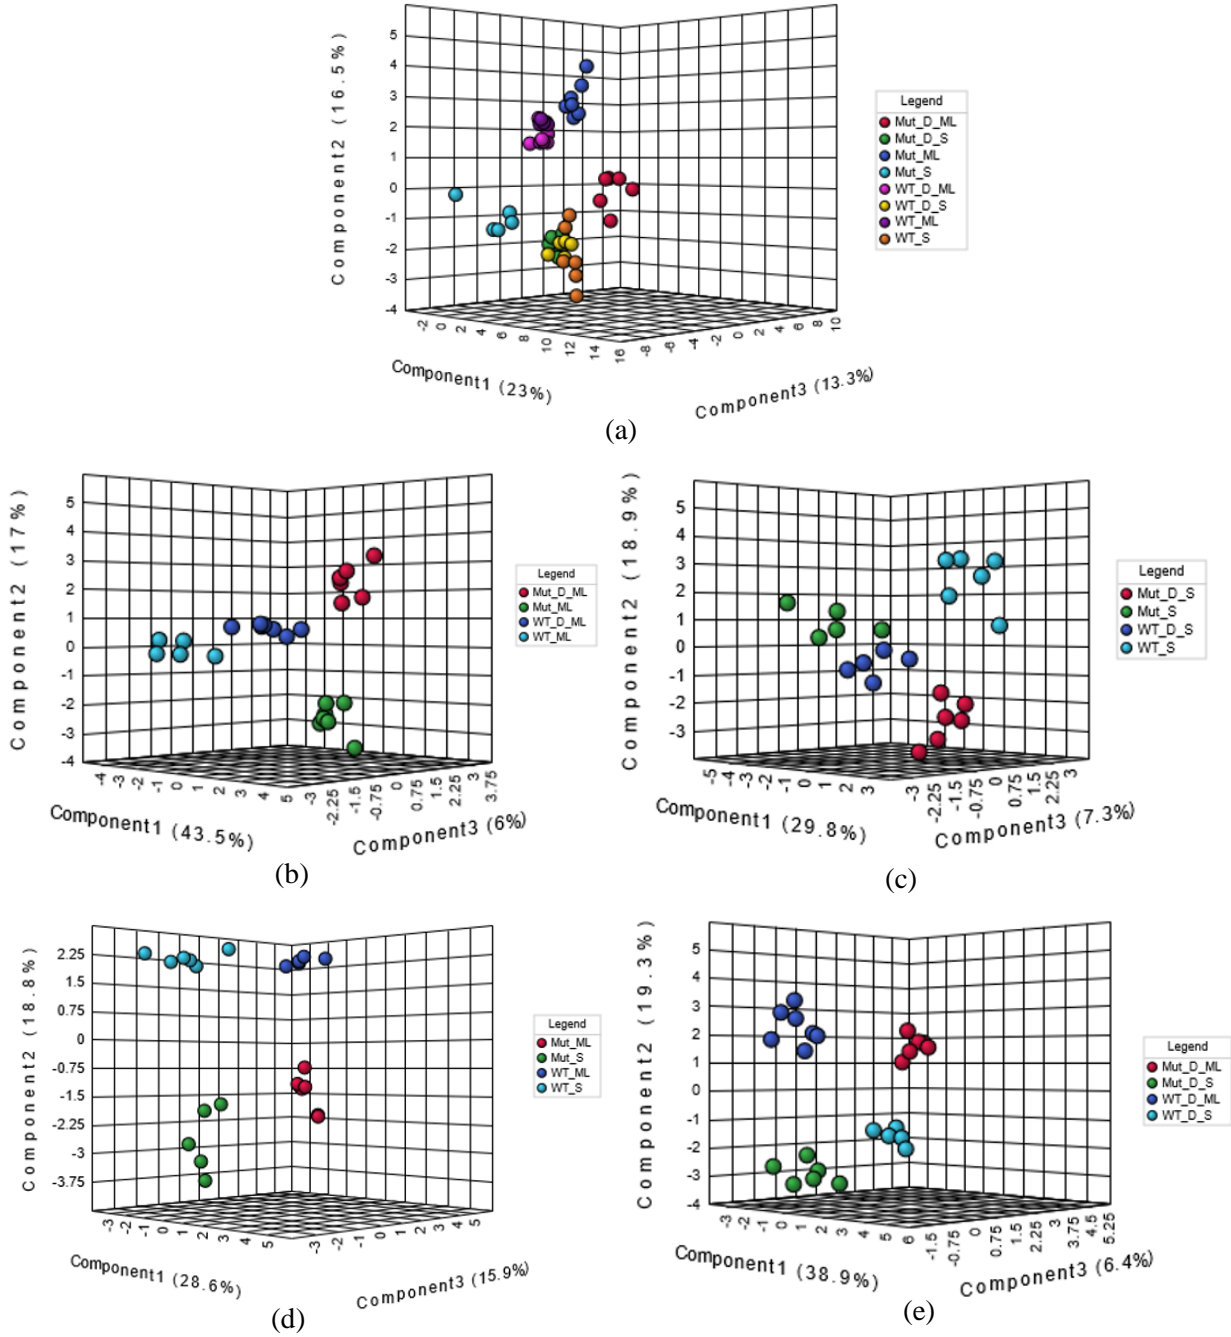

**Figure S7.** 3D sPLS-DA **a** Contains all sample types: showing a slight overlap of WT ML with WT D ML, Mut ML separated, Mut D ML separated, Mut S separated, while WT S, WT D S and Mut D S clustered. **b** Contains only mid log samples: showing WT ML clustering near WT D ML and complete separation of Mut ML and Mut D ML. **c** Contains only stationary phase samples: showing WT D S clustering between Mut D S and Mut S, WT S being the most distinct group. **d** Contains only unchallenged samples: showing a complete separation of sample types. **e** Contains only DABCOMD challenged samples: showing complete separation of all sample types.

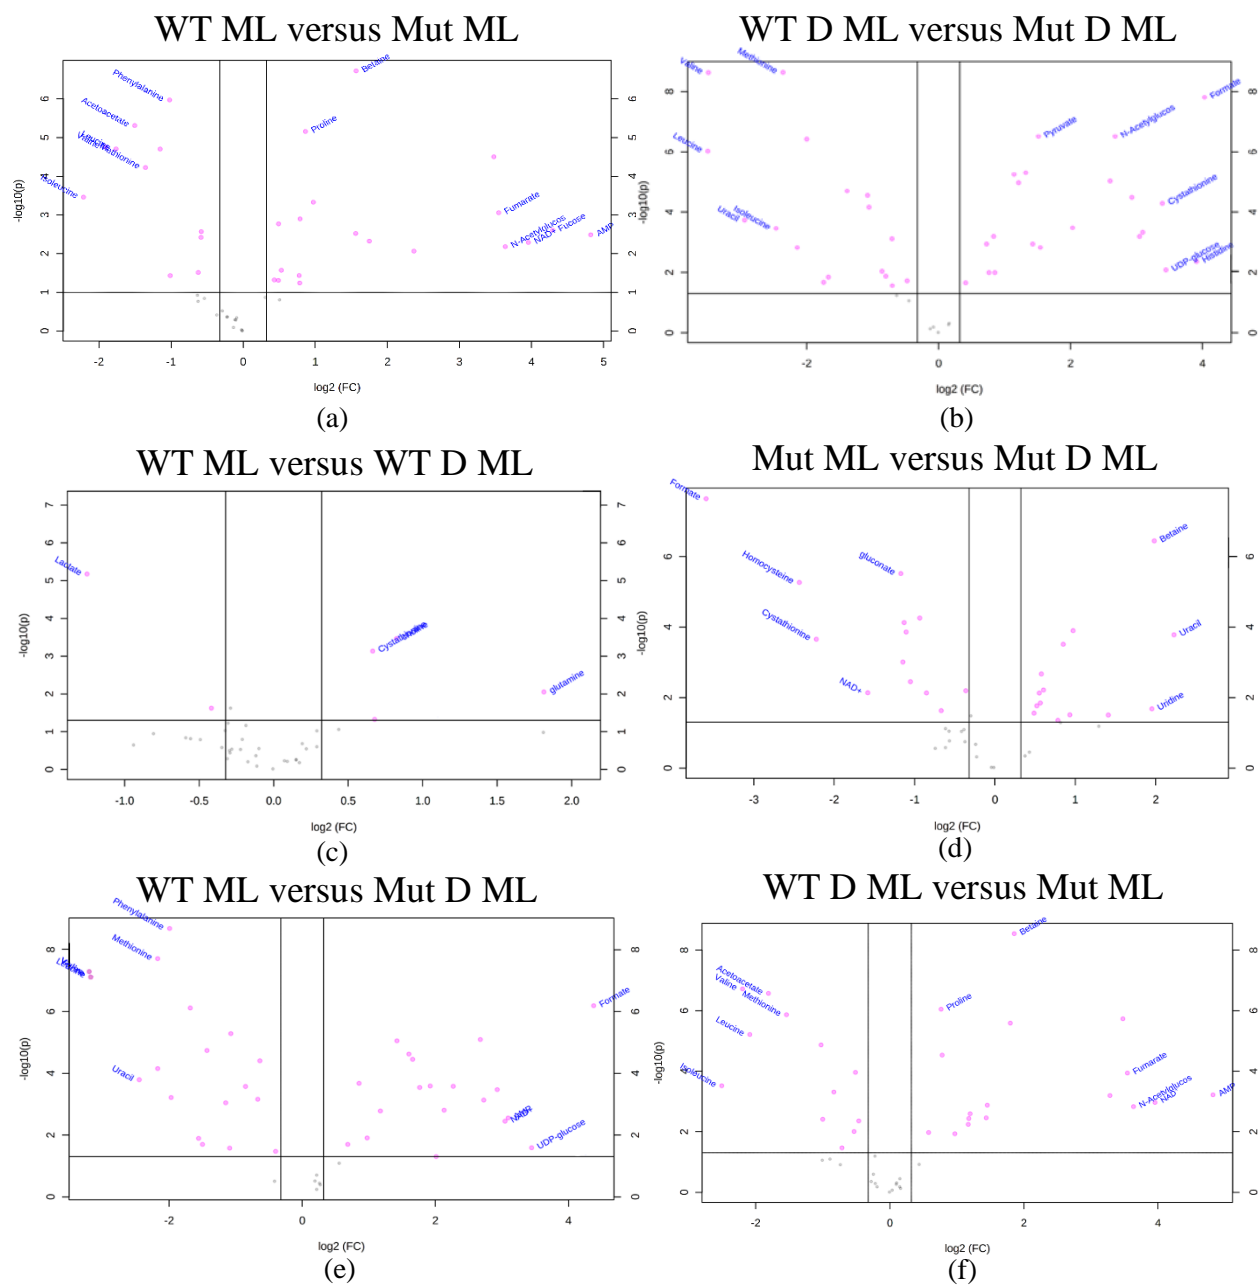

**Figure S8.** Volcano Plot showing significant p-values and fold changes for metabolites in the mid log phase paired up **a** WT and Mut **b** WT D and Mut D **c** WT and WT D **d** Mut and Mut D **e** WT and Mut D **f** WT D and Mut.

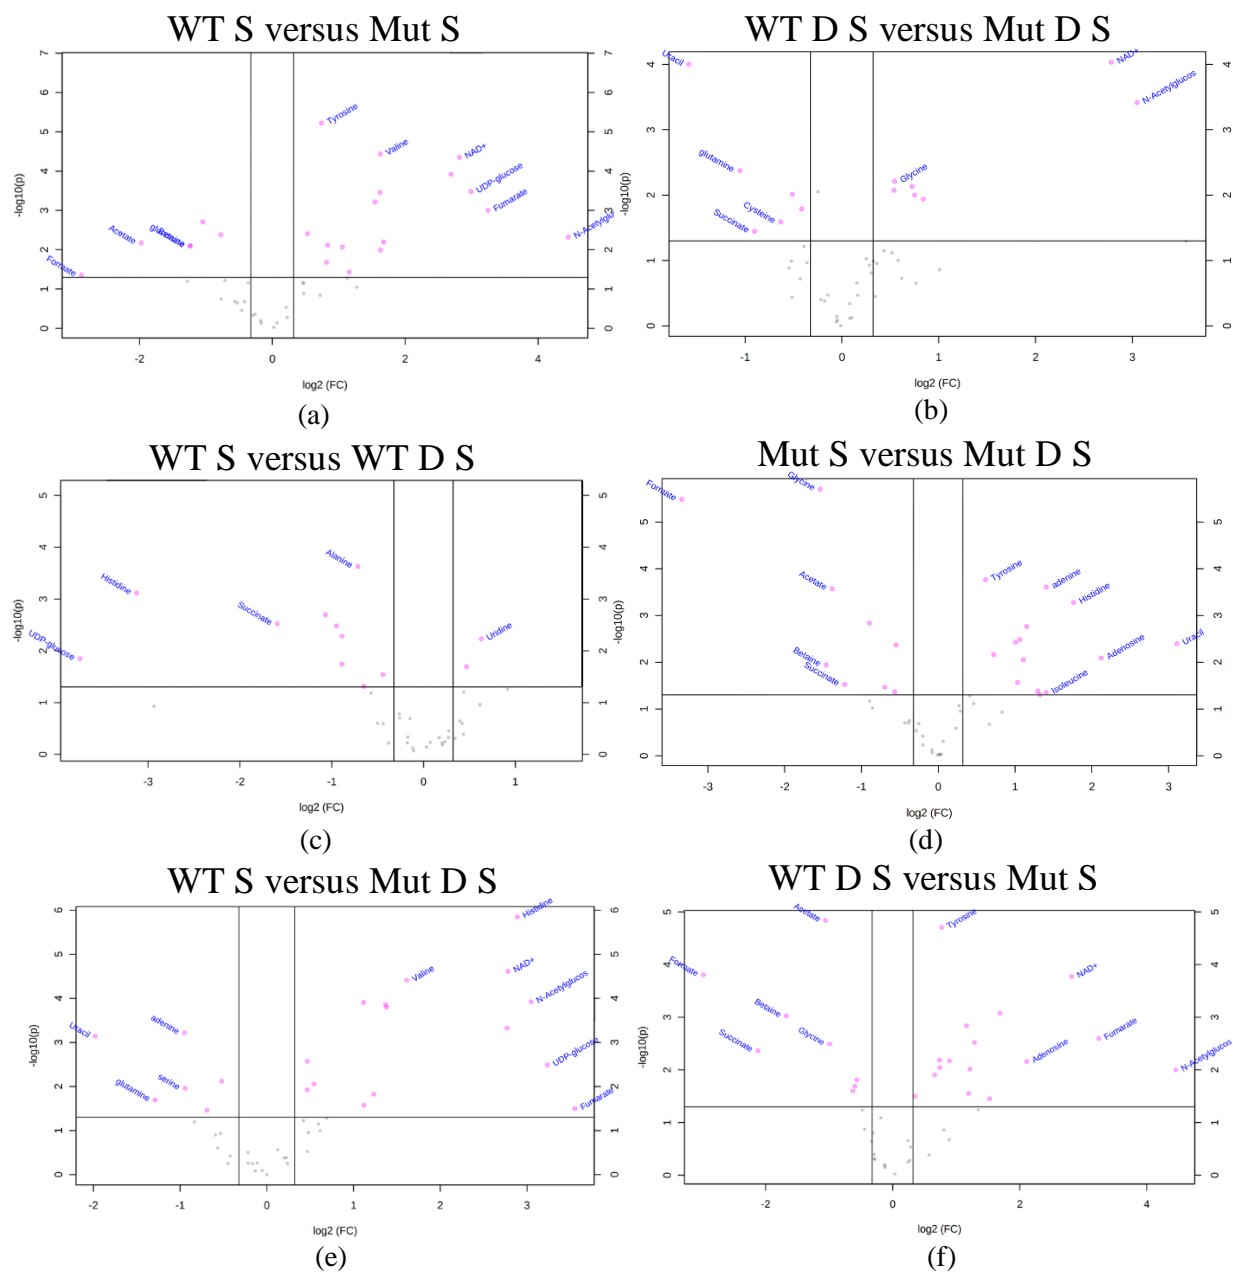

**Figure S9.** Volcano Plot showing significant p-values and fold changes for metabolites in the stationary phase paired up **a** WT and Mut **b** WT D and Mut D **c** WT and WT D **d** Mut and Mut D **e** WT and Mut D **f** WT D and Mut.

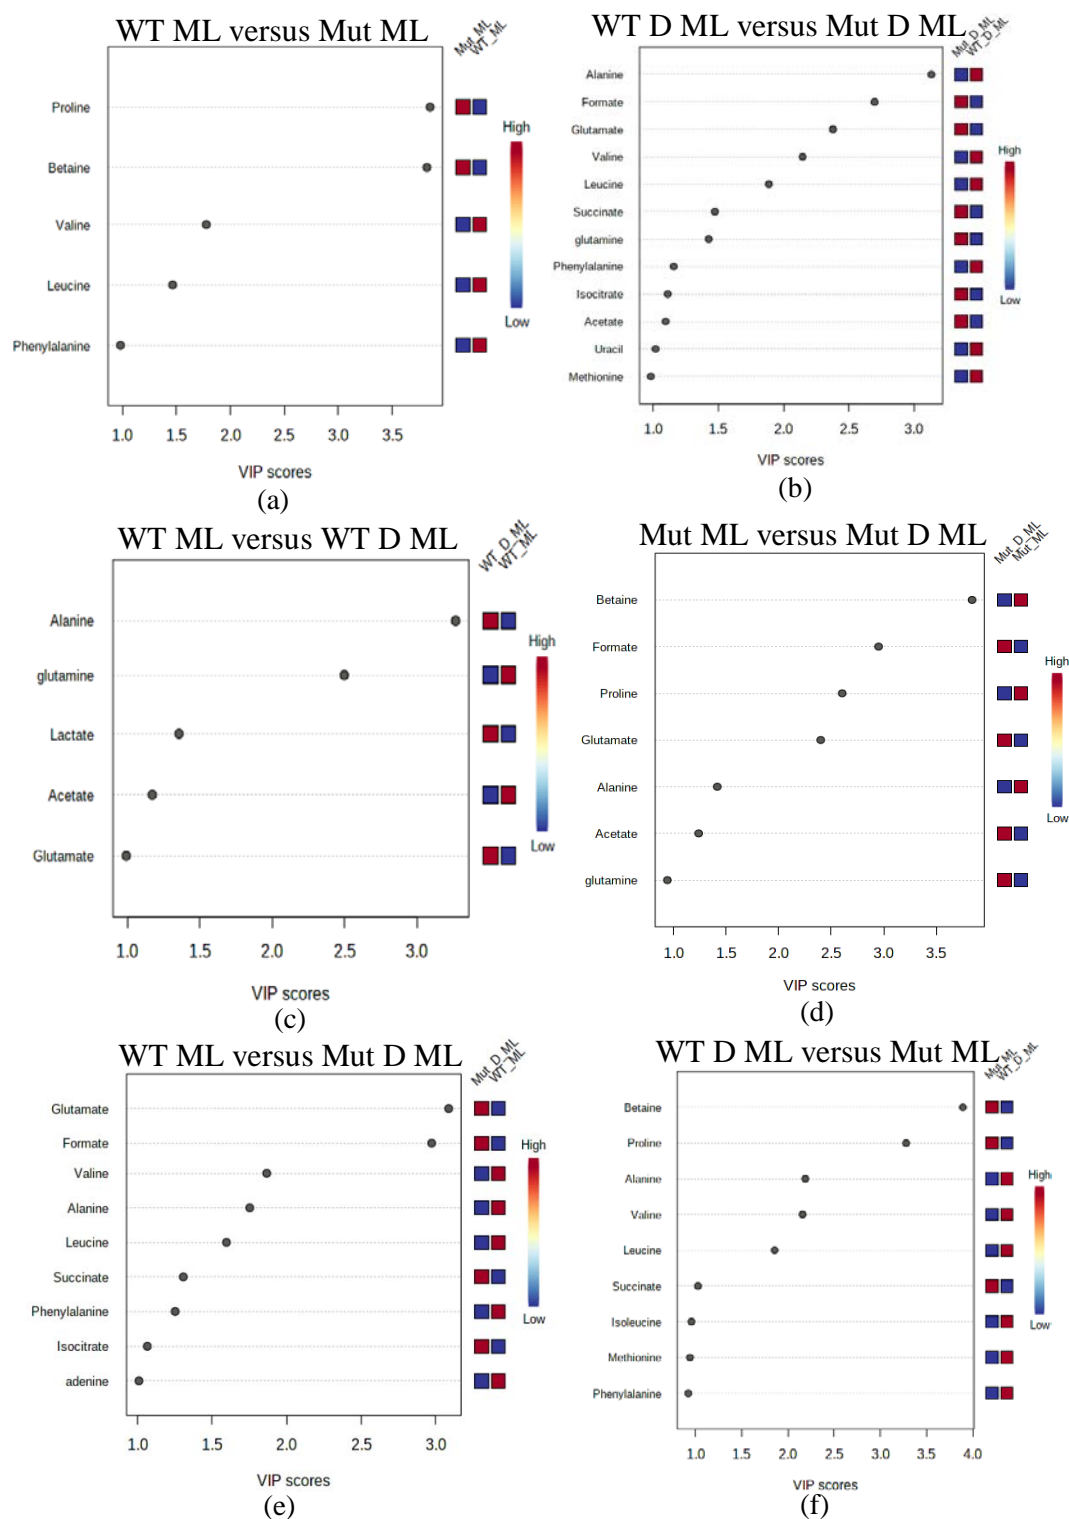

**Figure S10.** Very Important Features (VIP) scores obtained from the sPLS-DA which shows important metabolites in paired mid log phase samples **a** WT and Mut **b** WT D and Mut D **c** WT and WT D **d** Mut and Mut D **e** WT and Mut D **f** WT D and Mut.

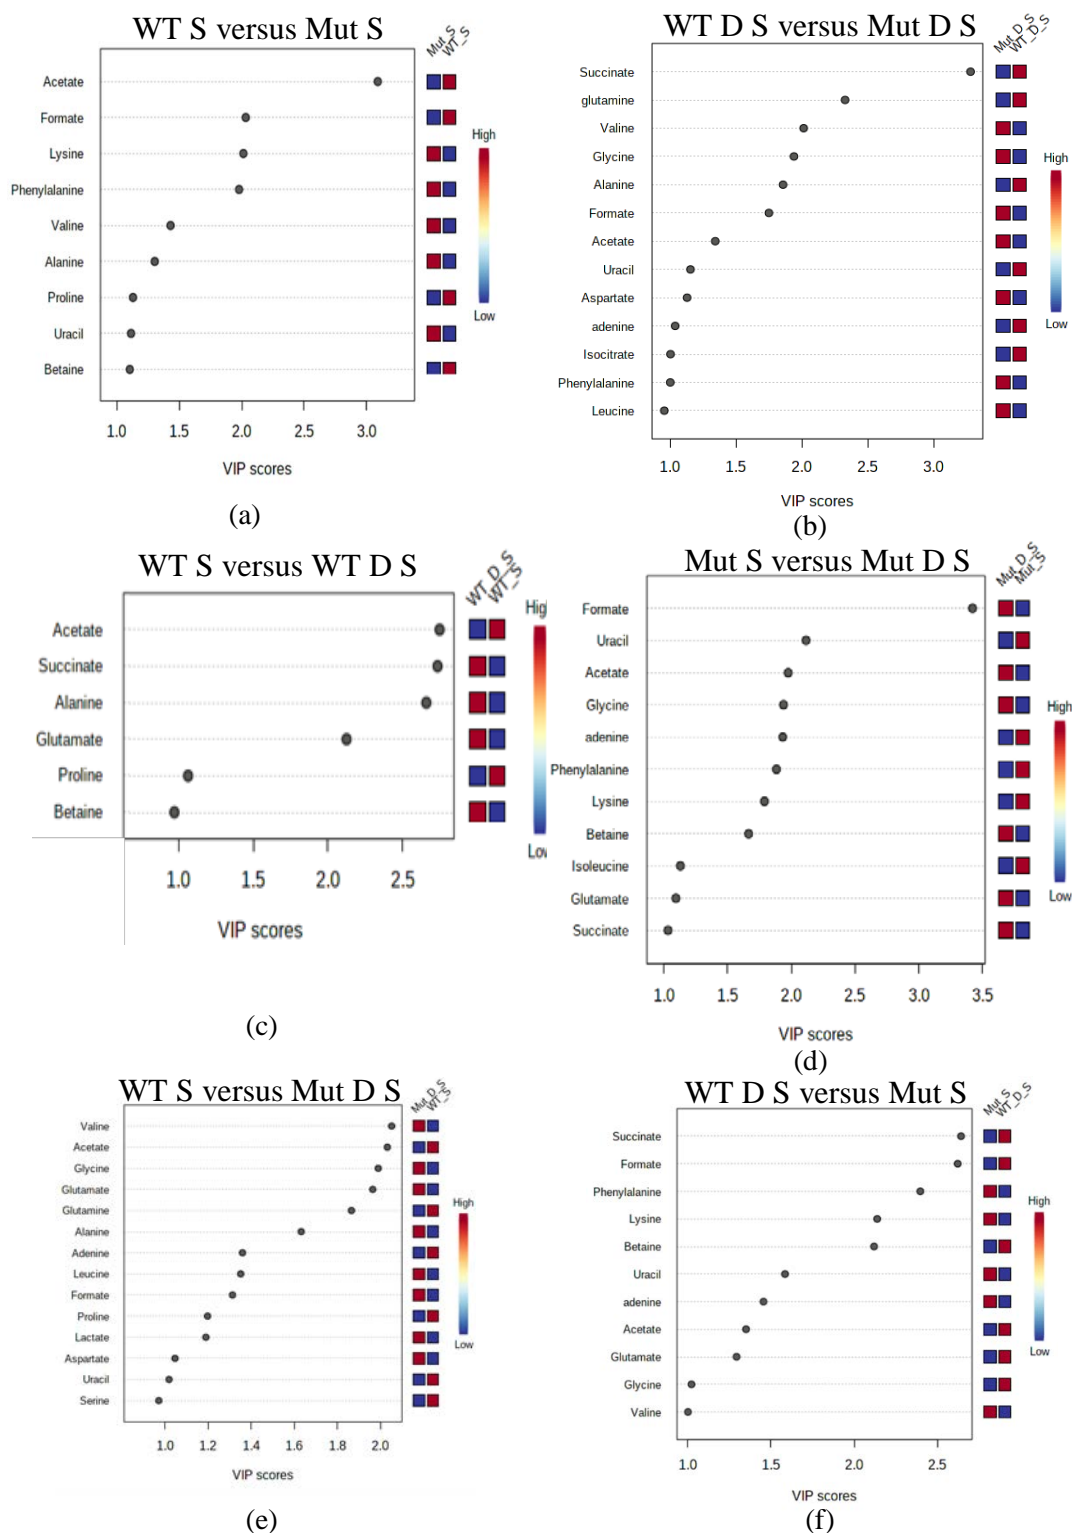

**Figure S11.** Very Important Features (VIP) scores obtained from the sPLS-DA which shows important metabolites in paired stationary phase samples **a** WT and Mut **b** WT D and Mut D **c** WT and WT D **d** Mut and Mut D **e** WT and Mut D **f** WT D and Mut.

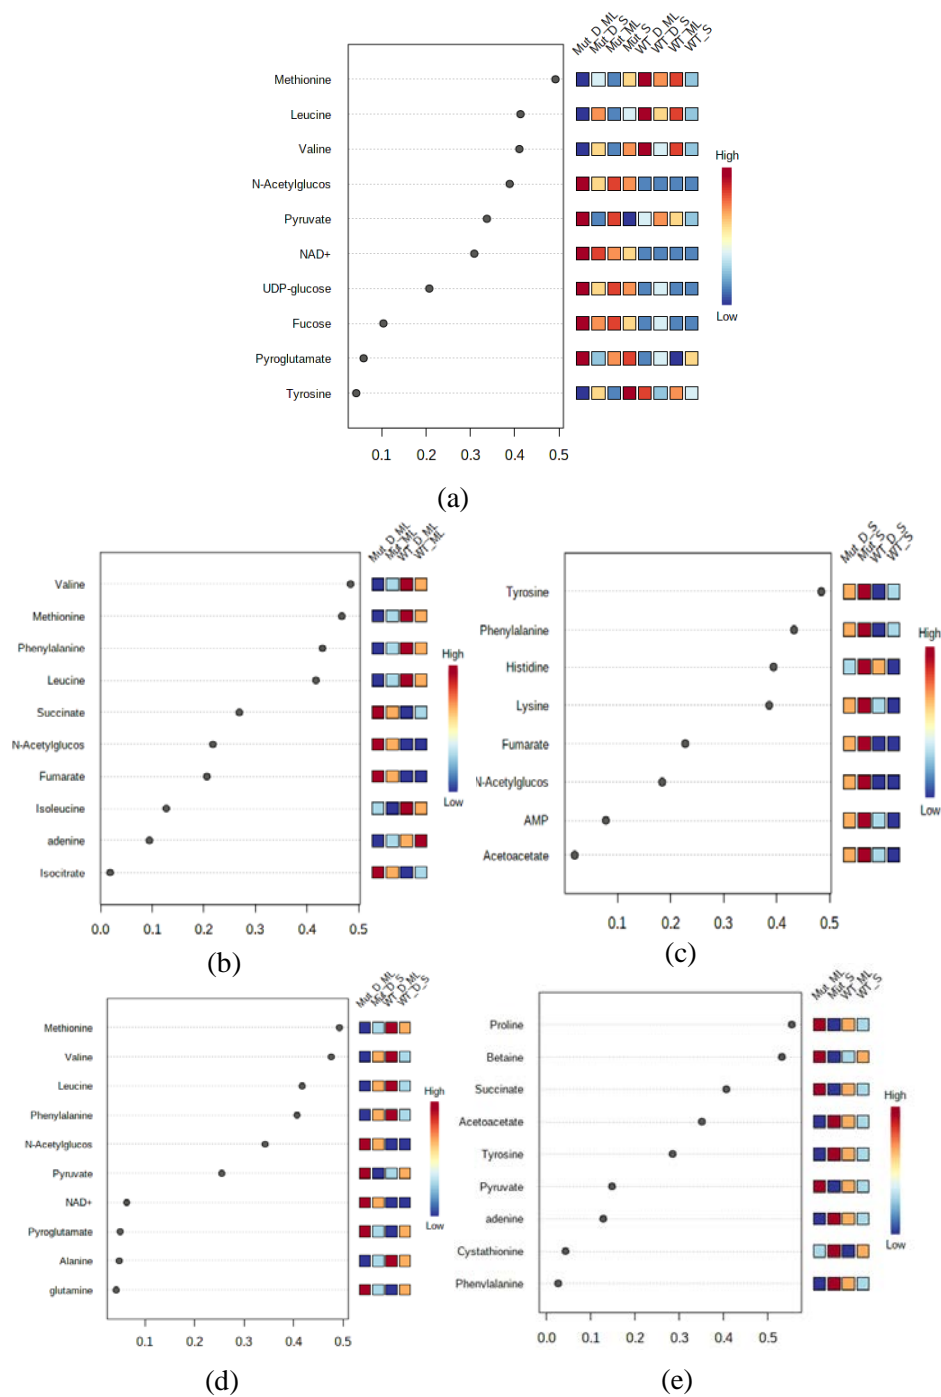

**Figure S12.** Very Important Features (VIP) scores obtained from the sPLS-DA which shows important metabolites in **a** all samples types **b** mid log samples **c** stationary phase samples **d** DABCOMD challenged samples **e** unchallenged samples

**Table S2.** Fold change of statistically significant metabolites in their corresponding metabolic pathways for the mid log phase of DABCOMD challenged mutant versus unchallenged wild type.

| <b>Mut D ML versus WT ML</b> |                                  |                                  |                          |                        |                    |
|------------------------------|----------------------------------|----------------------------------|--------------------------|------------------------|--------------------|
| <b>Indicated Pathway</b>     | <b>Metabolite</b>                | <b>Fold Change<sup>1,2</sup></b> | <b>Indicated Pathway</b> | <b>Metabolite</b>      | <b>Fold Change</b> |
| Citric Acid Cycle            | Acetoacetate                     | - 1.3                            | Alanine Metabolism       | Uracil <sup>4</sup>    | - 5.5 (VIP)        |
|                              | Fumarate <sup>3</sup>            | + 5.8                            |                          |                        |                    |
|                              | Isocitrate                       | + 3.8                            | Nucleotide Metabolism    | Adenine                | - 2.2 (VIP)        |
|                              | NAD <sup>+</sup> <sup>3</sup>    | + 37.0 (VIP)                     |                          | Uracil <sup>4</sup>    | - 5.5 (VIP)        |
|                              | Succinate                        | + 1.8 (VIP)                      |                          | Uridine                | - 3.9              |
| Pyruvate Metabolism          | Formate                          | + 20.8 (VIP)                     |                          | Alanine <sup>4</sup>   | - 1.6 (VIP)        |
|                              | Pyruvate                         | + 2.7                            |                          | AMP <sup>3</sup>       | + 6.8              |
| Peptidoglycan Synthesis      | Alanine <sup>4</sup>             | - 1.6 (VIP)                      |                          | Aspartate <sup>4</sup> | + 1.6              |
|                              | Cystathionine                    | + 6.6                            |                          | Glutamate <sup>4</sup> | + 2.0 (VIP)        |
|                              | Glutamate <sup>4</sup>           | + 2.0 (VIP)                      | Aminoacyl-tRNA           | Glycine <sup>4</sup>   | - 1.8              |
|                              | Glycine <sup>4</sup>             | - 1.8                            |                          | Histidine              | + 4.8              |
|                              | Lactate                          | + 2.2                            | Biosynthesis             | Isoleucine             | - 4.5              |
|                              | N-Acetylglucosamine <sup>3</sup> | + 94.2                           |                          | Leucine                | - 9.0 (VIP)        |
|                              | Aspartate <sup>4</sup>           | + 1.6                            |                          | Phenylalanine          | - 4.0 (VIP)        |
| Methionine Metabolism        | Cysteine                         | + 3.2                            |                          | Tyrosine               | - 2.7              |
|                              | Homocysteine                     | + 5.1                            |                          | Valine                 | - 9.2 (VIP)        |
|                              | Methionine                       | - 4.5                            |                          |                        |                    |

<sup>1</sup>A positive fold change is indicative of a higher concentration in the mutant. <sup>2</sup>The metabolites with VIP next to them were determined to be very important features by the PSL-DA. <sup>3</sup>These metabolites had concentrations lower than 0.01 for the sample with the lowest concentration. <sup>4</sup>These metabolites are shown in multiple pathways where a correlation was shown by Pattern Hunter.

**Table S3.** Fold change of statistically significant metabolites in their corresponding metabolic pathways for the stationary phase of DABCOMD challenged mutant versus unchallenged wild type.

| <b>Mut D S versus WT S</b> |                                  |                                  |                             |                          |                    |
|----------------------------|----------------------------------|----------------------------------|-----------------------------|--------------------------|--------------------|
| <b>Indicated Pathway</b>   | <b>Metabolite</b>                | <b>Fold Change<sup>1,2</sup></b> | <b>Indicated Pathway</b>    | <b>Metabolite</b>        | <b>Fold Change</b> |
| Citric Acid Cycle          | Fumarate <sup>3</sup>            | + 3.6                            | Alanine Metabolism          | Uracil <sup>4</sup>      | - 3.9 (VIP)        |
|                            | NAD <sup>+</sup> <sup>3</sup>    | + 13.5                           |                             |                          |                    |
|                            | Isocitrate <sup>5</sup>          | - 1.2                            | Nucleotide Metabolism       | Adenine                  | - 1.9 (VIP)        |
|                            | Succinate <sup>5</sup>           | + 1.6                            |                             | Uracil <sup>4</sup>      | - 3.9 (VIP)        |
| Pyruvate Metabolism        | Formate                          | + 1.4 (VIP)                      |                             | Alanine <sup>4</sup>     | + 1.4 (VIP)        |
|                            |                                  |                                  |                             | Aspartate <sup>4</sup>   | + 2.2 (VIP)        |
| Peptidoglycan Synthesis    | Alanine <sup>4</sup>             | + 1.4 (VIP)                      | Aminoacyl-tRNA Biosynthesis | Glutamate <sup>4,5</sup> | + 1.5 (VIP)        |
|                            | Glutamate <sup>4,5</sup>         | + 1.5 (VIP)                      |                             | Glycine <sup>4</sup>     | + 2.2              |
|                            | Glycine <sup>4</sup>             | + 2.2 (VIP)                      |                             | Histidine <sup>3</sup>   | + 6.4              |
|                            | Lactate                          | + 2.6 (VIP)                      |                             | Leucine                  | + 2.6 (VIP)        |
|                            | Lysine                           | + 1.5                            |                             | Phenylalanine            | + 1.4 (VIP)        |
|                            | N-Acetylglucosamine <sup>3</sup> | + 19.4                           |                             | Proline                  | - 1.4 (VIP)        |
| Methionine Metabolism      | Aspartate <sup>4</sup>           | + 2.2 (VIP)                      |                             | Valine                   | + 3.1 (VIP)        |
|                            | Serine                           | - 1.9 (VIP)                      |                             |                          |                    |

<sup>1</sup>A positive fold change is indicative of a higher concentration in the mutant. <sup>2</sup>The metabolites with VIP next to them were determined to be very important features by the PSL-DA. <sup>3</sup>These metabolites had concentrations lower than 0.01 for the sample with the lowest concentration. <sup>4</sup>These metabolites are shown in multiple pathways where a correlation was shown by Pattern Hunter. <sup>5</sup>These metabolites do not have significant p-values, but they are VIPs.

#### Challenged Mutant versus Unchallenged Wild Types Comparisons for Tables S2 and S3

When comparing challenged mutant mid log (Mut D ML) to unchallenged wild type (WT) ML, comparisons of Mut to WT and challenged to unchallenged are effectively being concurrently evaluated. This unsurprisingly leads to many observable differences in the concentrations of metabolites in energy production, aminoacyl-tRNA biosynthesis, peptidoglycan synthesis and related pathways. For example, the challenged mutant samples had higher concentrations of energy related metabolites, except for acetoacetate which was lower. It is particularly interesting that isocitrate was 3.8-fold higher and formate was 20.8-fold higher in the mutant samples. The challenged Mut samples had a 37-fold increase in NAD<sup>+</sup> and a 6.8-fold increase in AMP when compared to the unchallenged WT. N-acetylglucosamine had a 94.2-fold increase in the challenged Mut samples when compared to the unchallenged WT samples. Aspartate correlated to cysteine, homocysteine, methionine, and cystathionine. Nucleotide metabolism components in the mid log phase had a decreased concentration in the challenged mutant samples, and multiple components of aminoacyl-tRNA biosynthesis changed. When comparing Mut D S to WT S, the same types of pathways changed as with the mid log phase, although the fold change differences were not as large. N-acetylglucosamine, lysine, lactate, glycine, glutamate (VIP) and alanine (VIP), all components of peptidoglycan synthesis, were in higher concentration in the challenged mutant stationary phase, in comparison to the unchallenged wild type stationary phase.



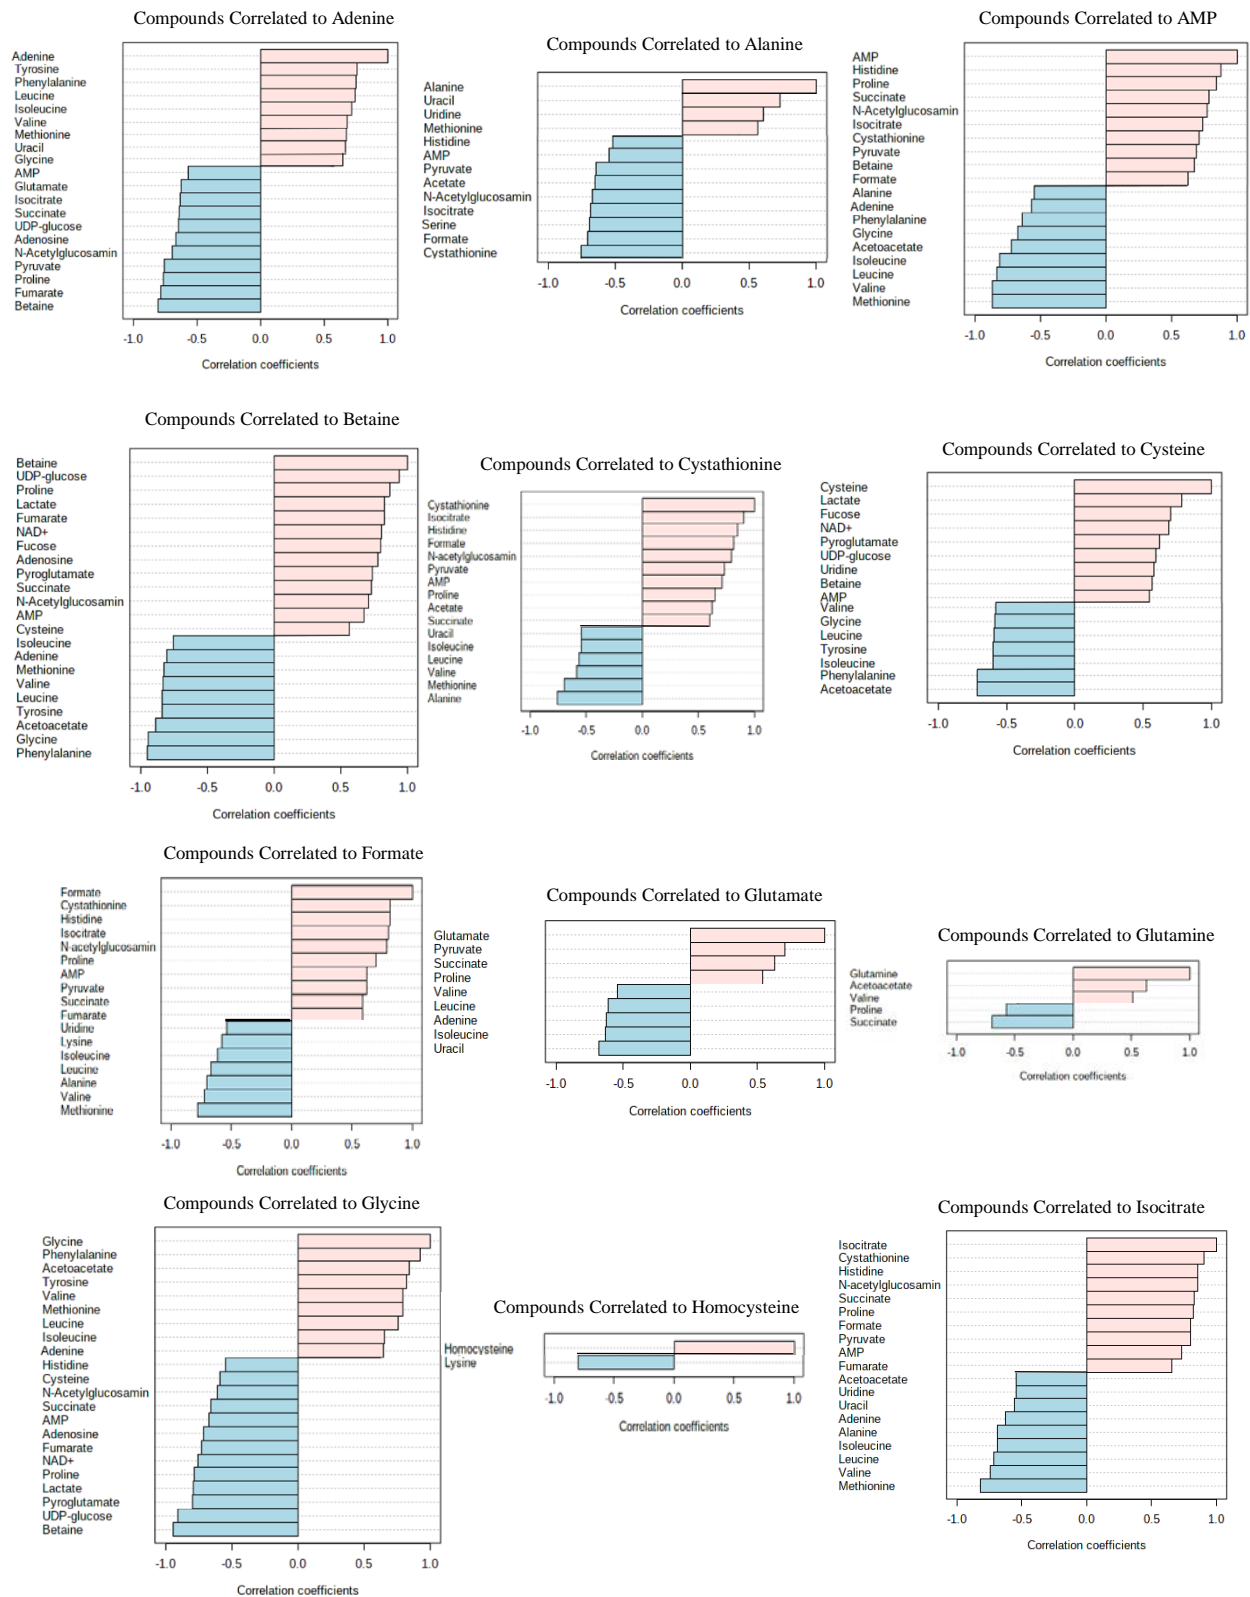

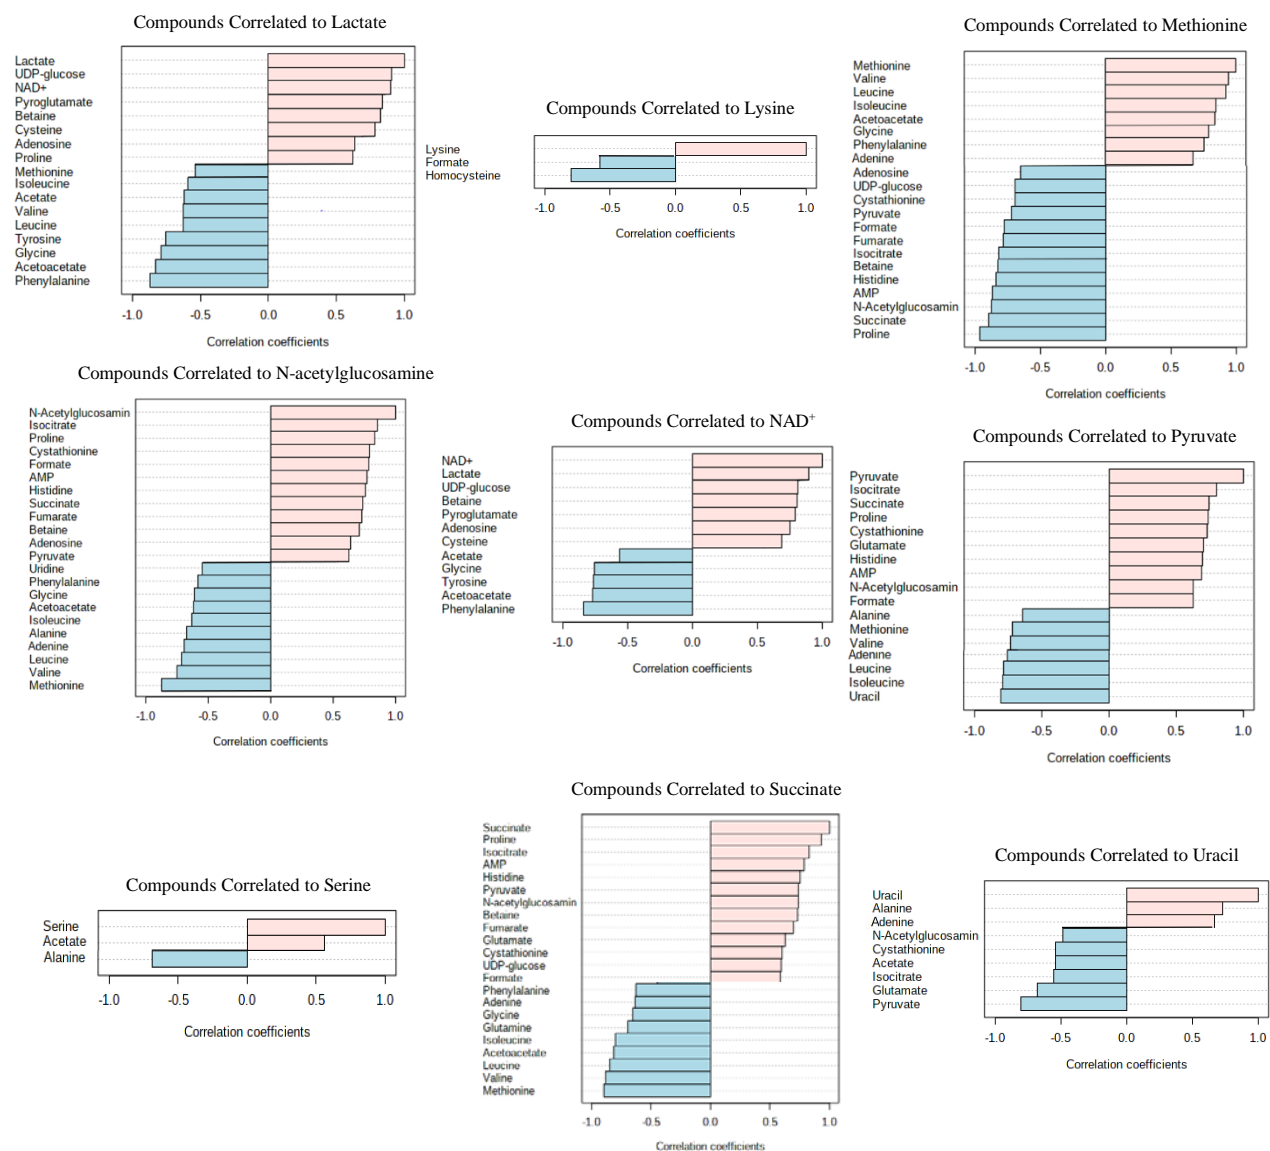

**Figure S13.** Pattern Hunter Correlations between Metabolites Observed in the Mid Log Phase Comparison of Unchallenged Mutant and Unchallenged Wild Type Samples.

Compounds Correlated to Adenine

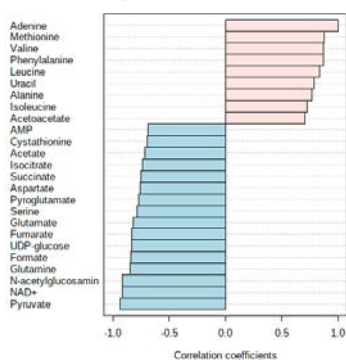

Compounds Correlated to Alanine

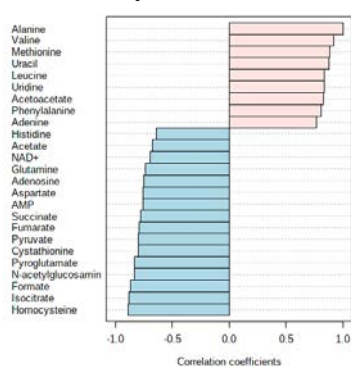

Compounds Correlated to AMP

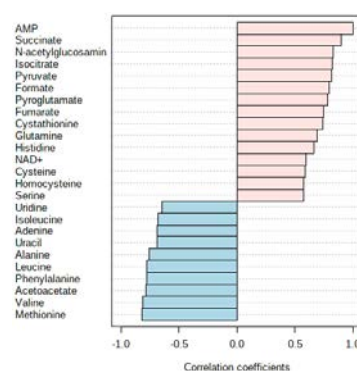

Compounds Correlated to Aspartate

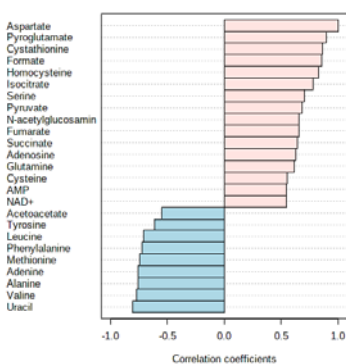

Compounds Correlated to Cystathionine

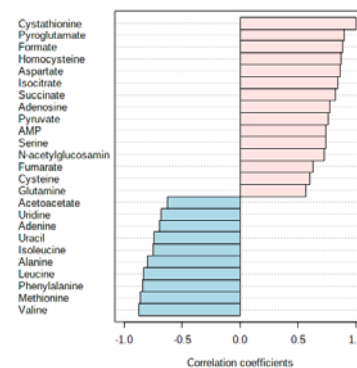

Compounds Correlated to Betaine

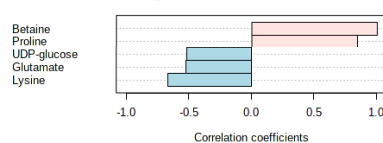

Compounds Correlated to Cysteine

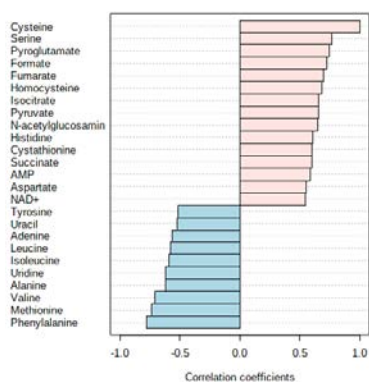

Compounds Correlated to Formate

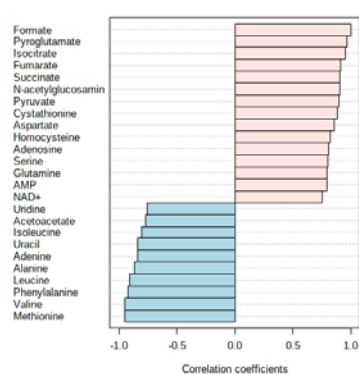

Compounds Correlated to Glutamate

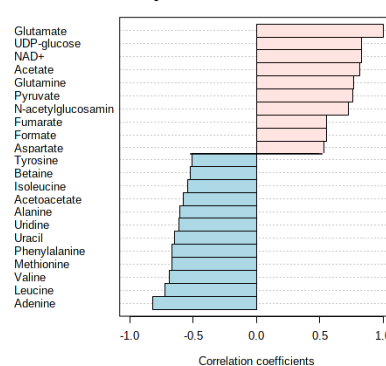

Compounds Correlated to Glutamine

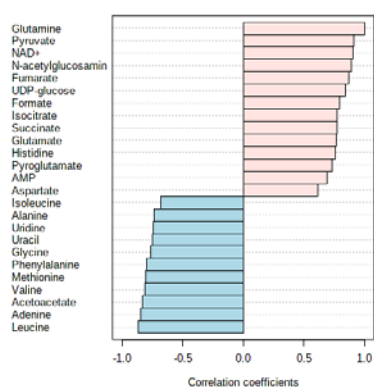

Compounds Correlated to Glycine

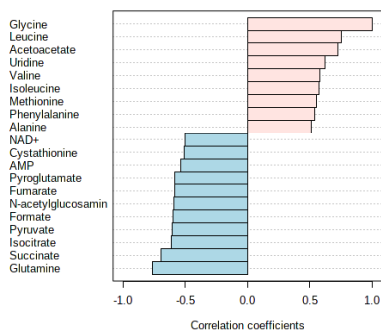

Compounds Correlated to Homocysteine

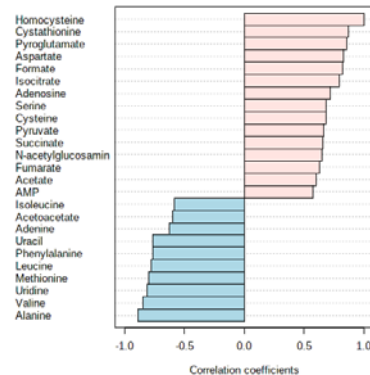

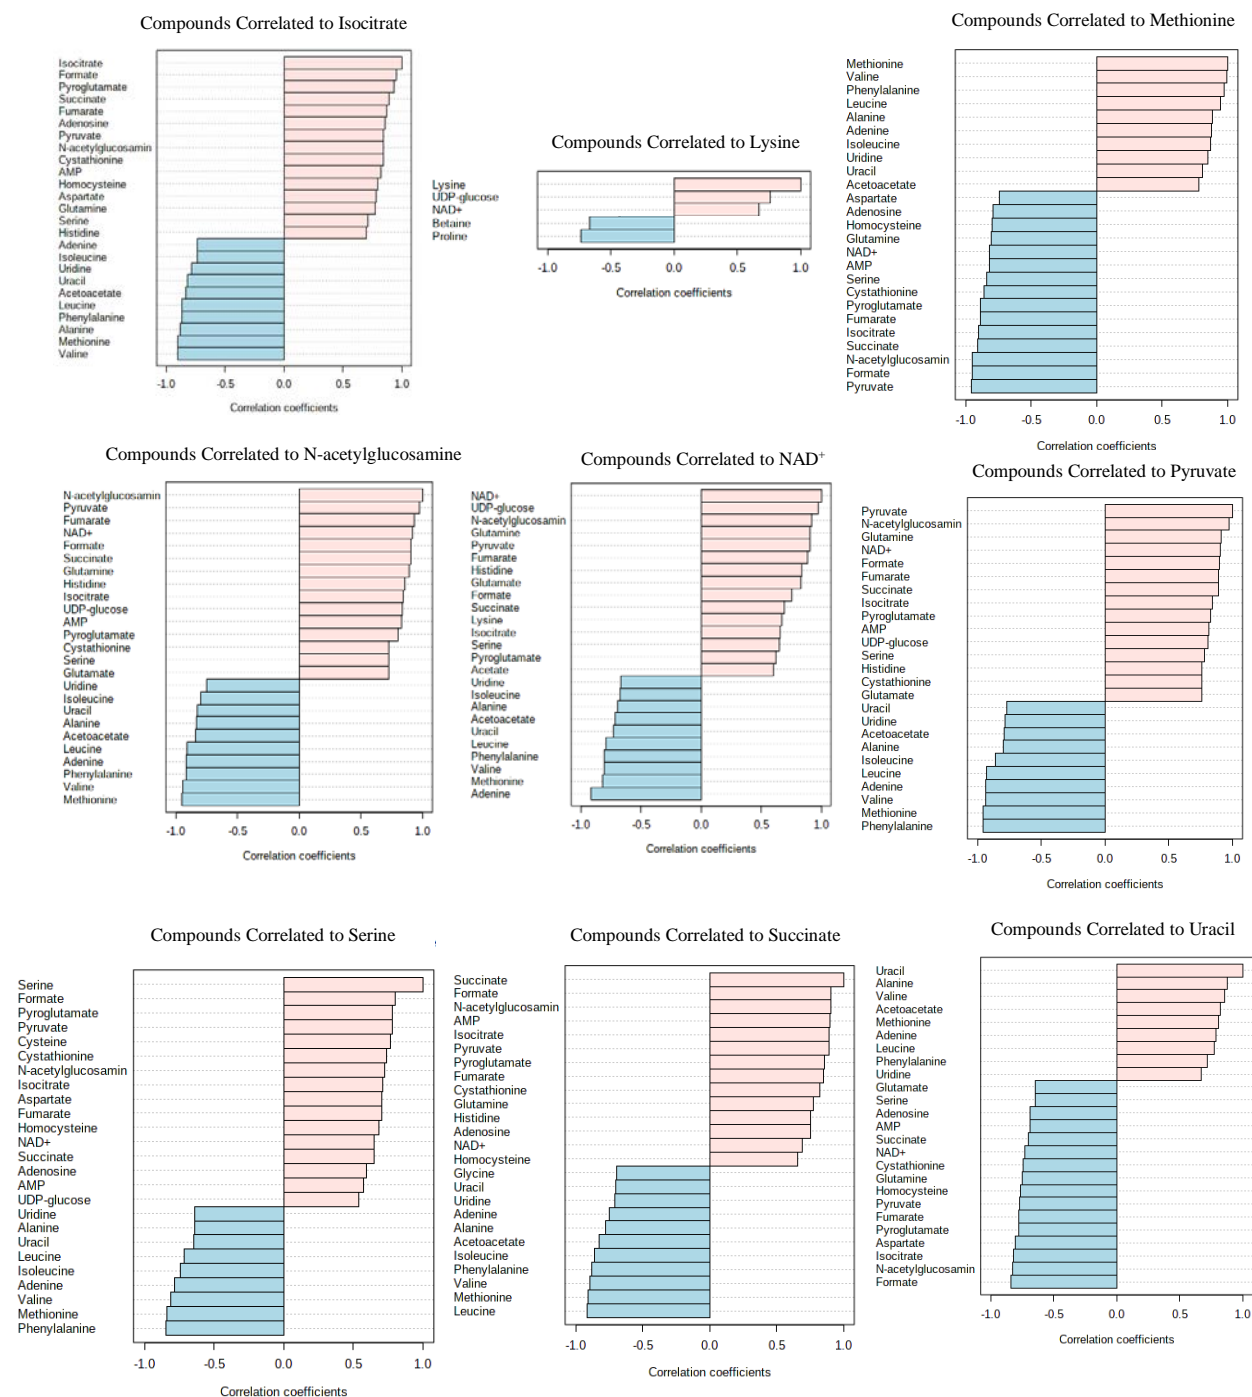

**Figure S14.** Pattern Hunter Correlations between Metabolites Observed in the Mid Log Phase Comparison of Challenged Mutant and Challenged Wild Type Samples.

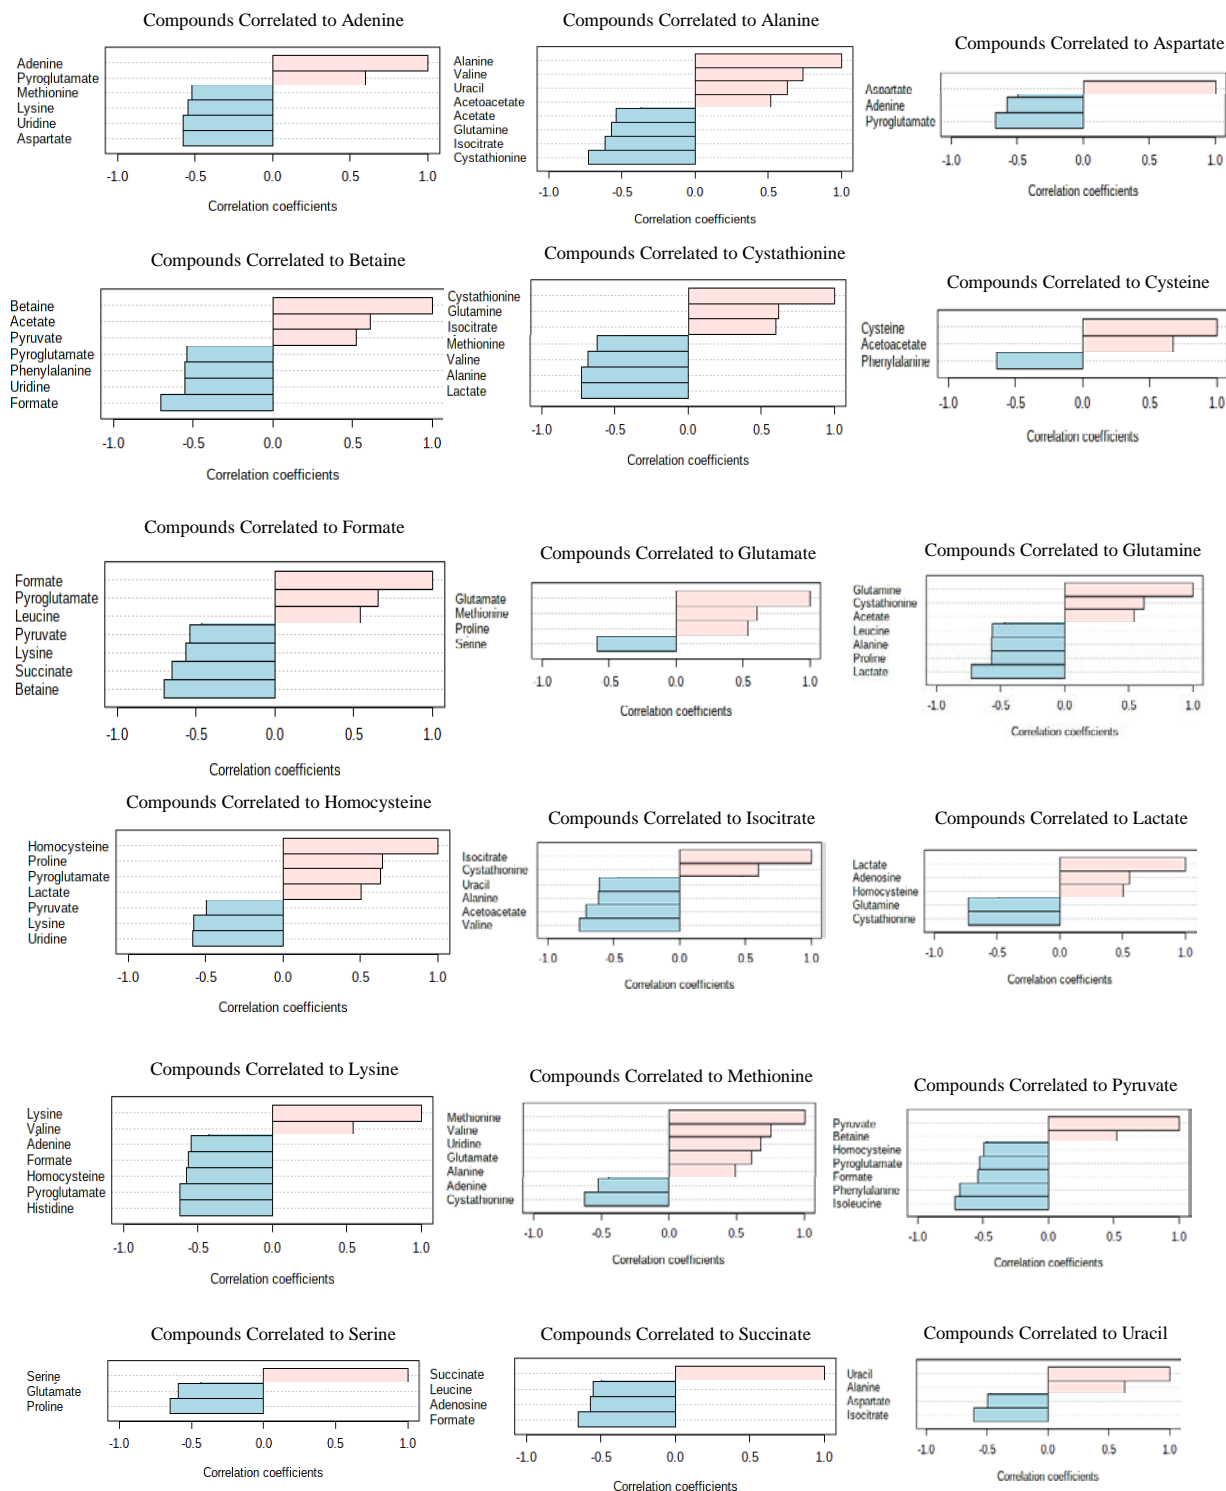

**Figure S15.** Pattern Hunter Correlations between Metabolites Observed in the Mid Log Phase Comparison of Challenged Wild Type and Unchallenged Wild Type Samples.

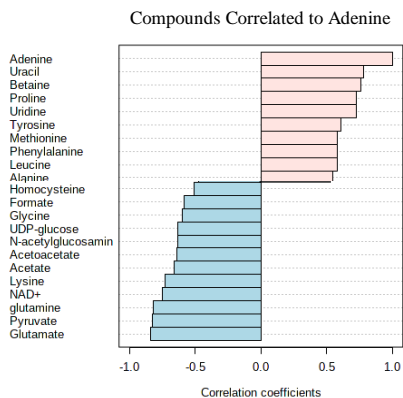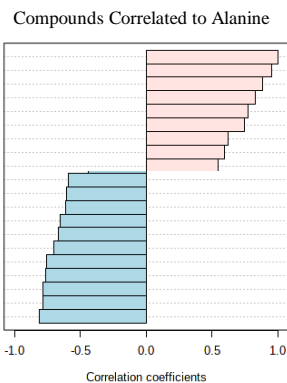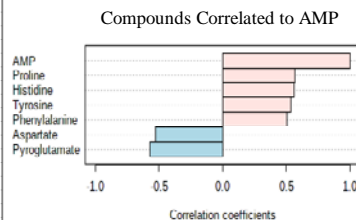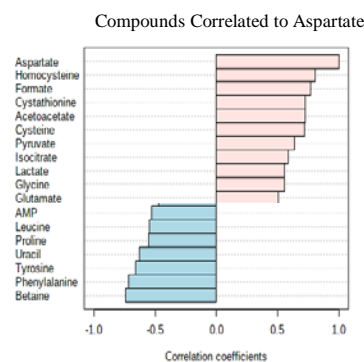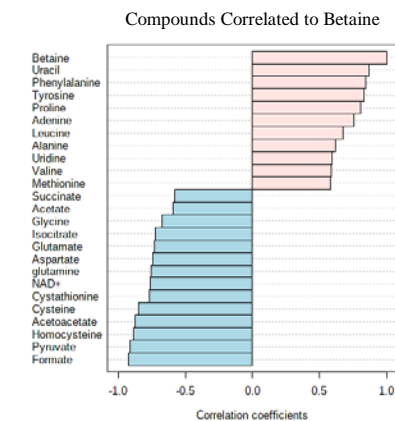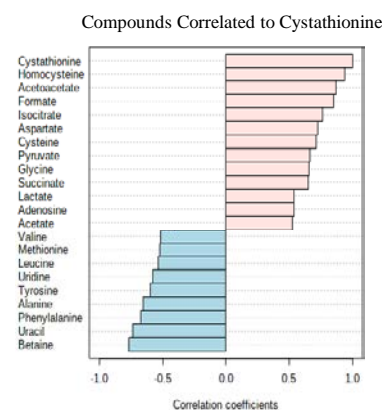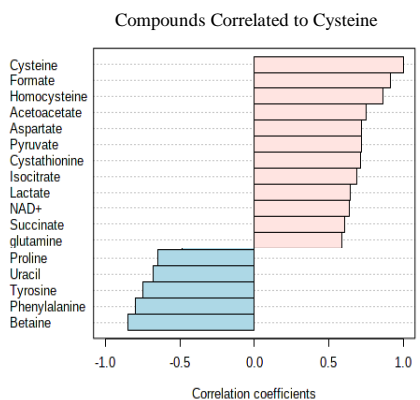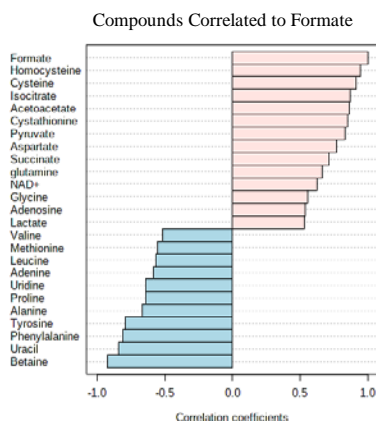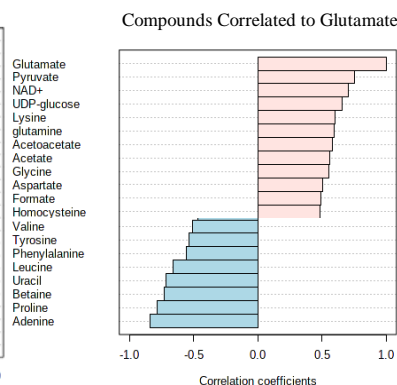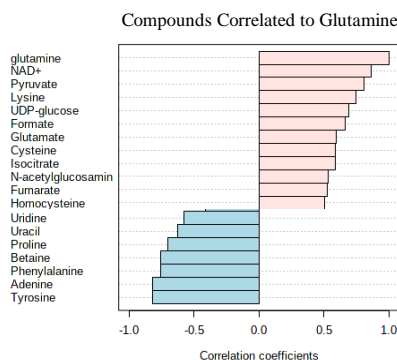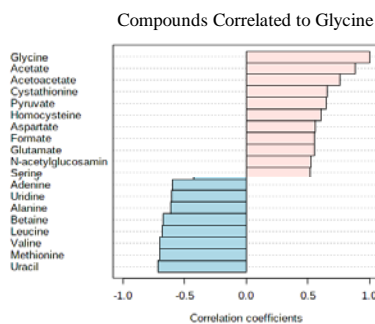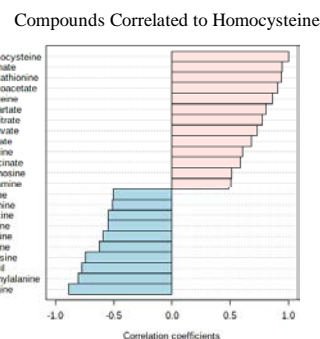



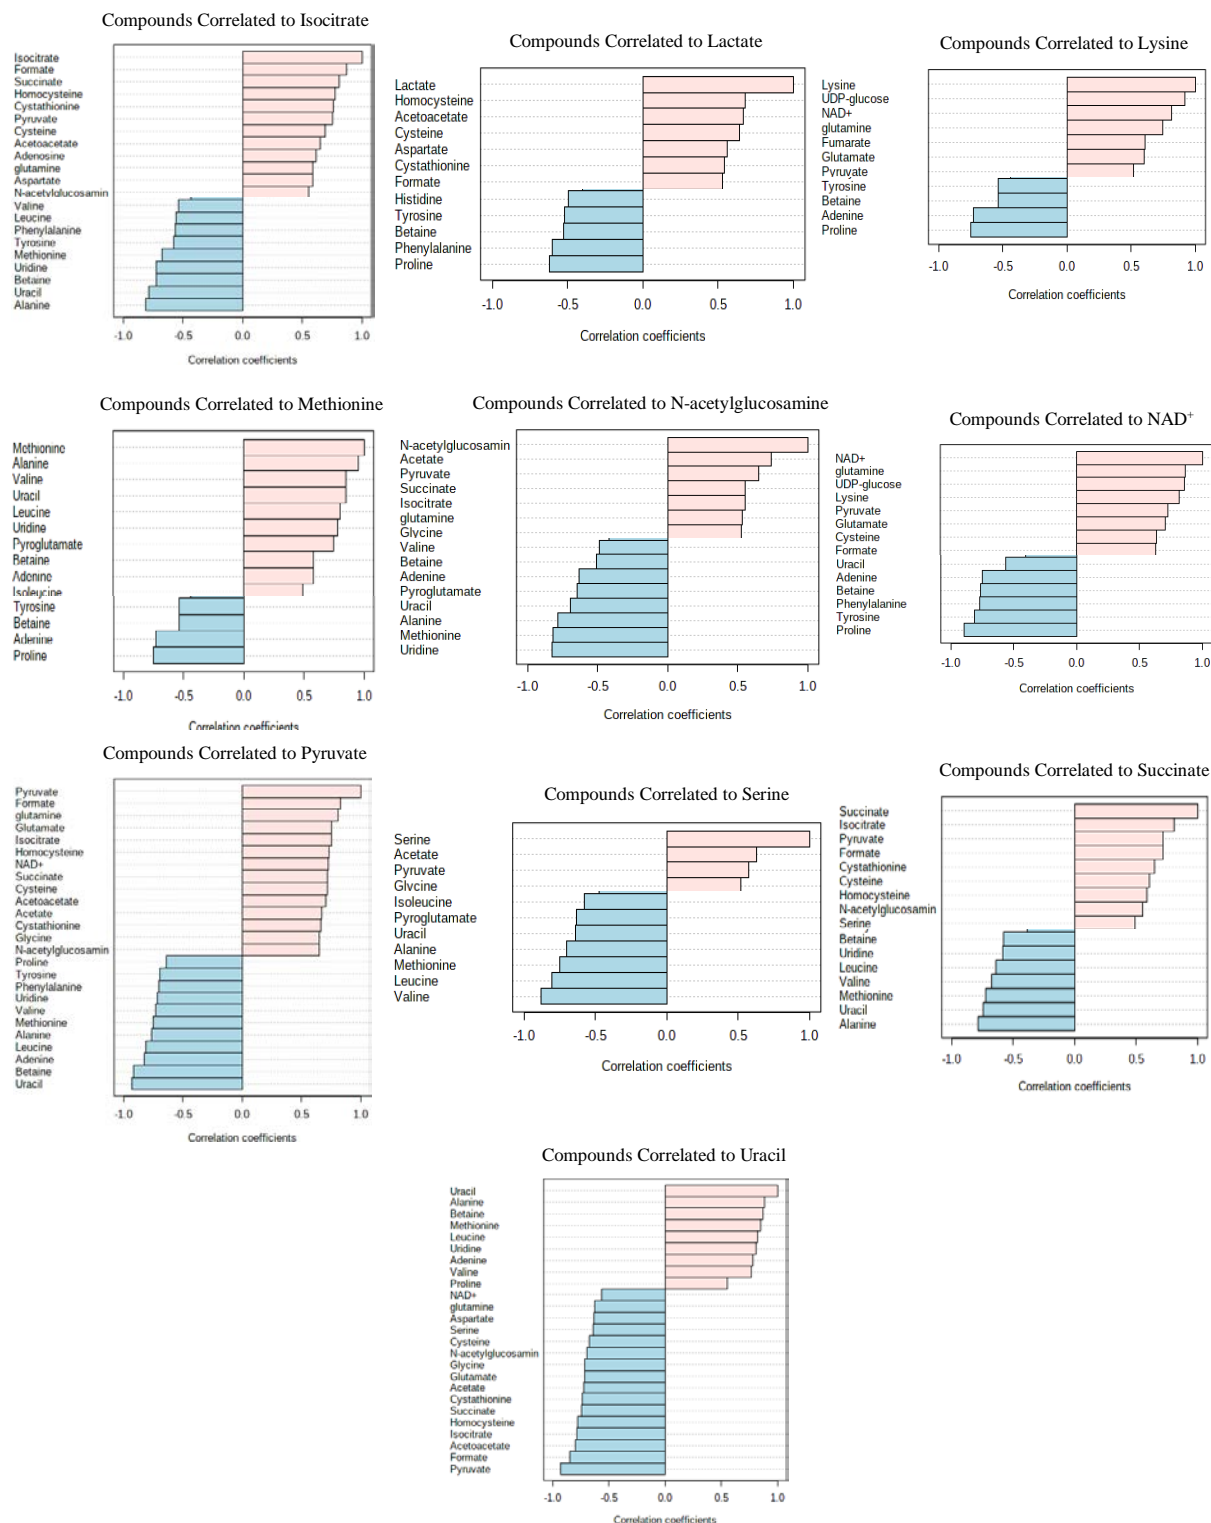

**Figure S16.** Pattern Hunter Correlations between Metabolites Observed in the Mid Log Phase Comparison of Challenged Mutant and Unchallenged Mutant Samples.

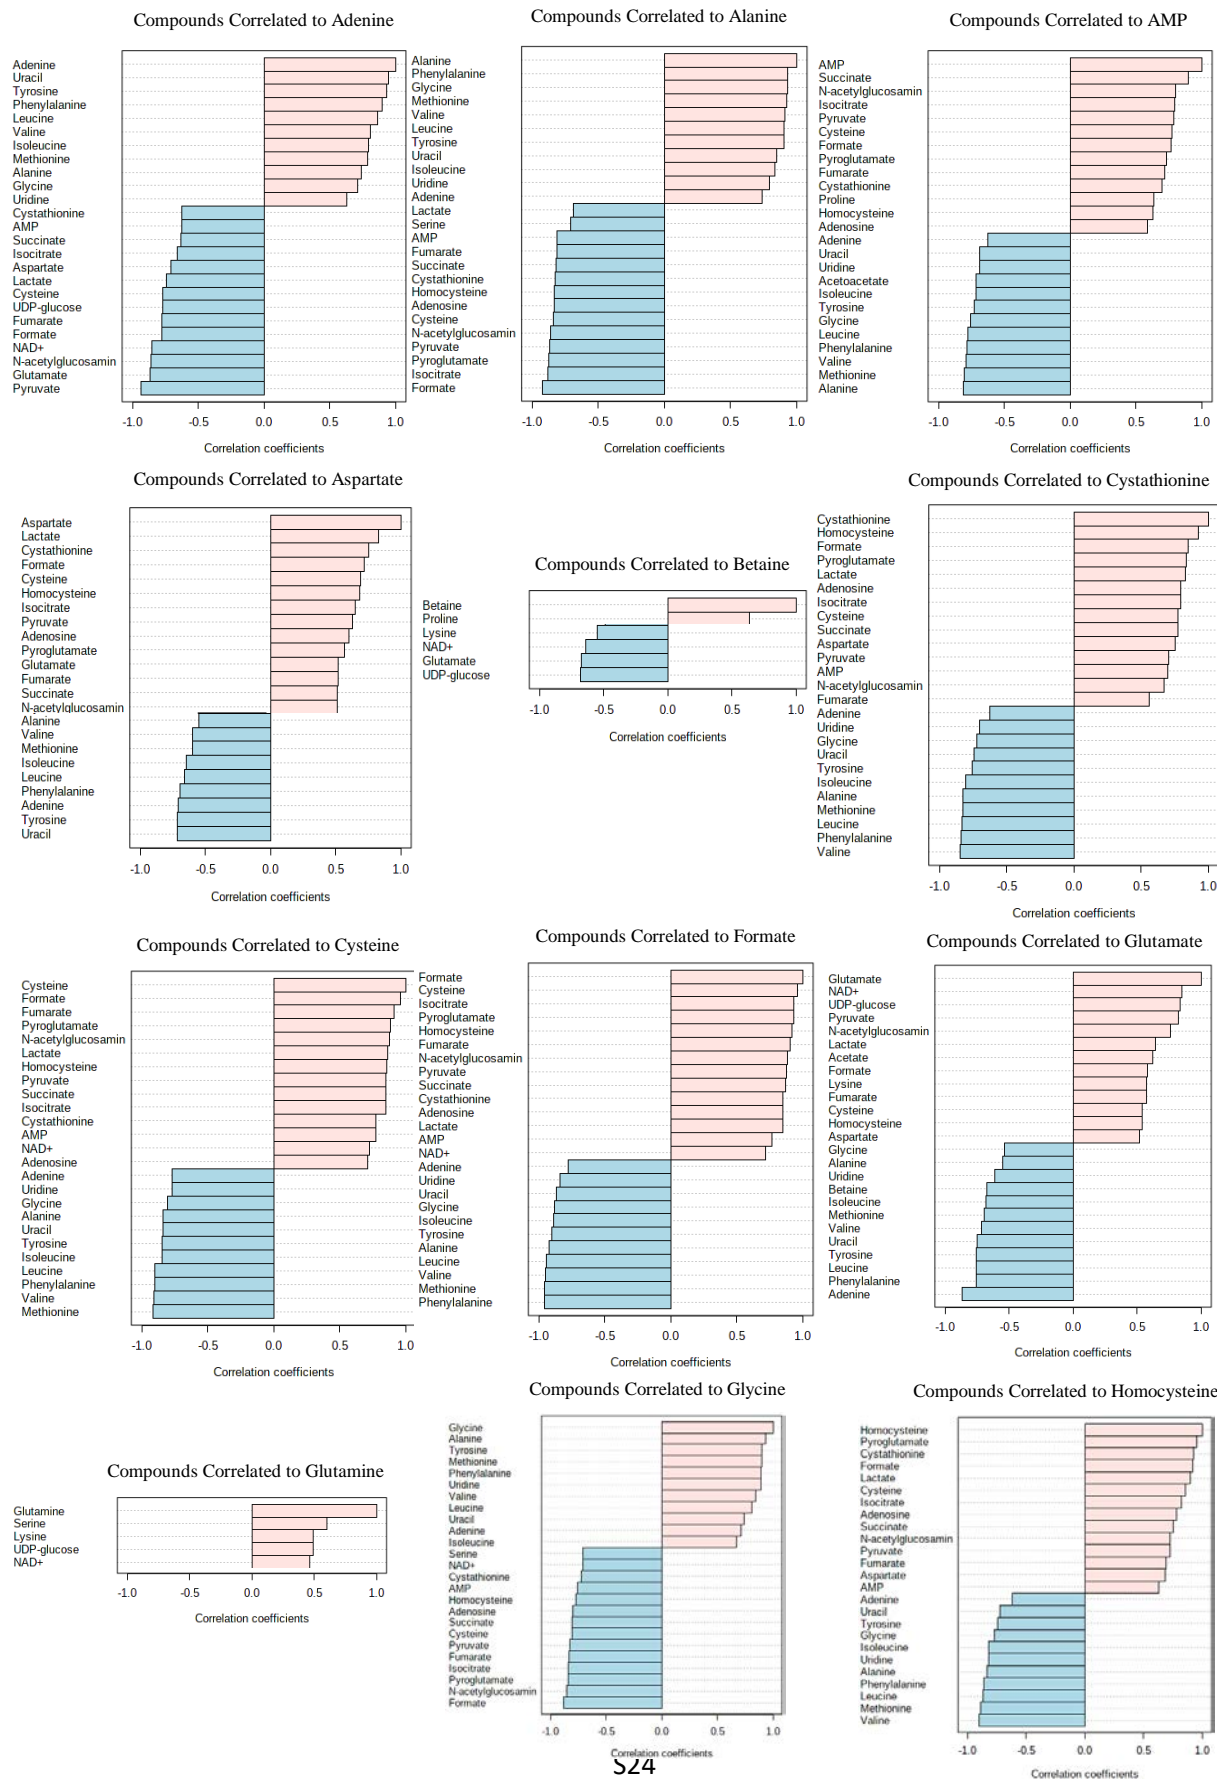



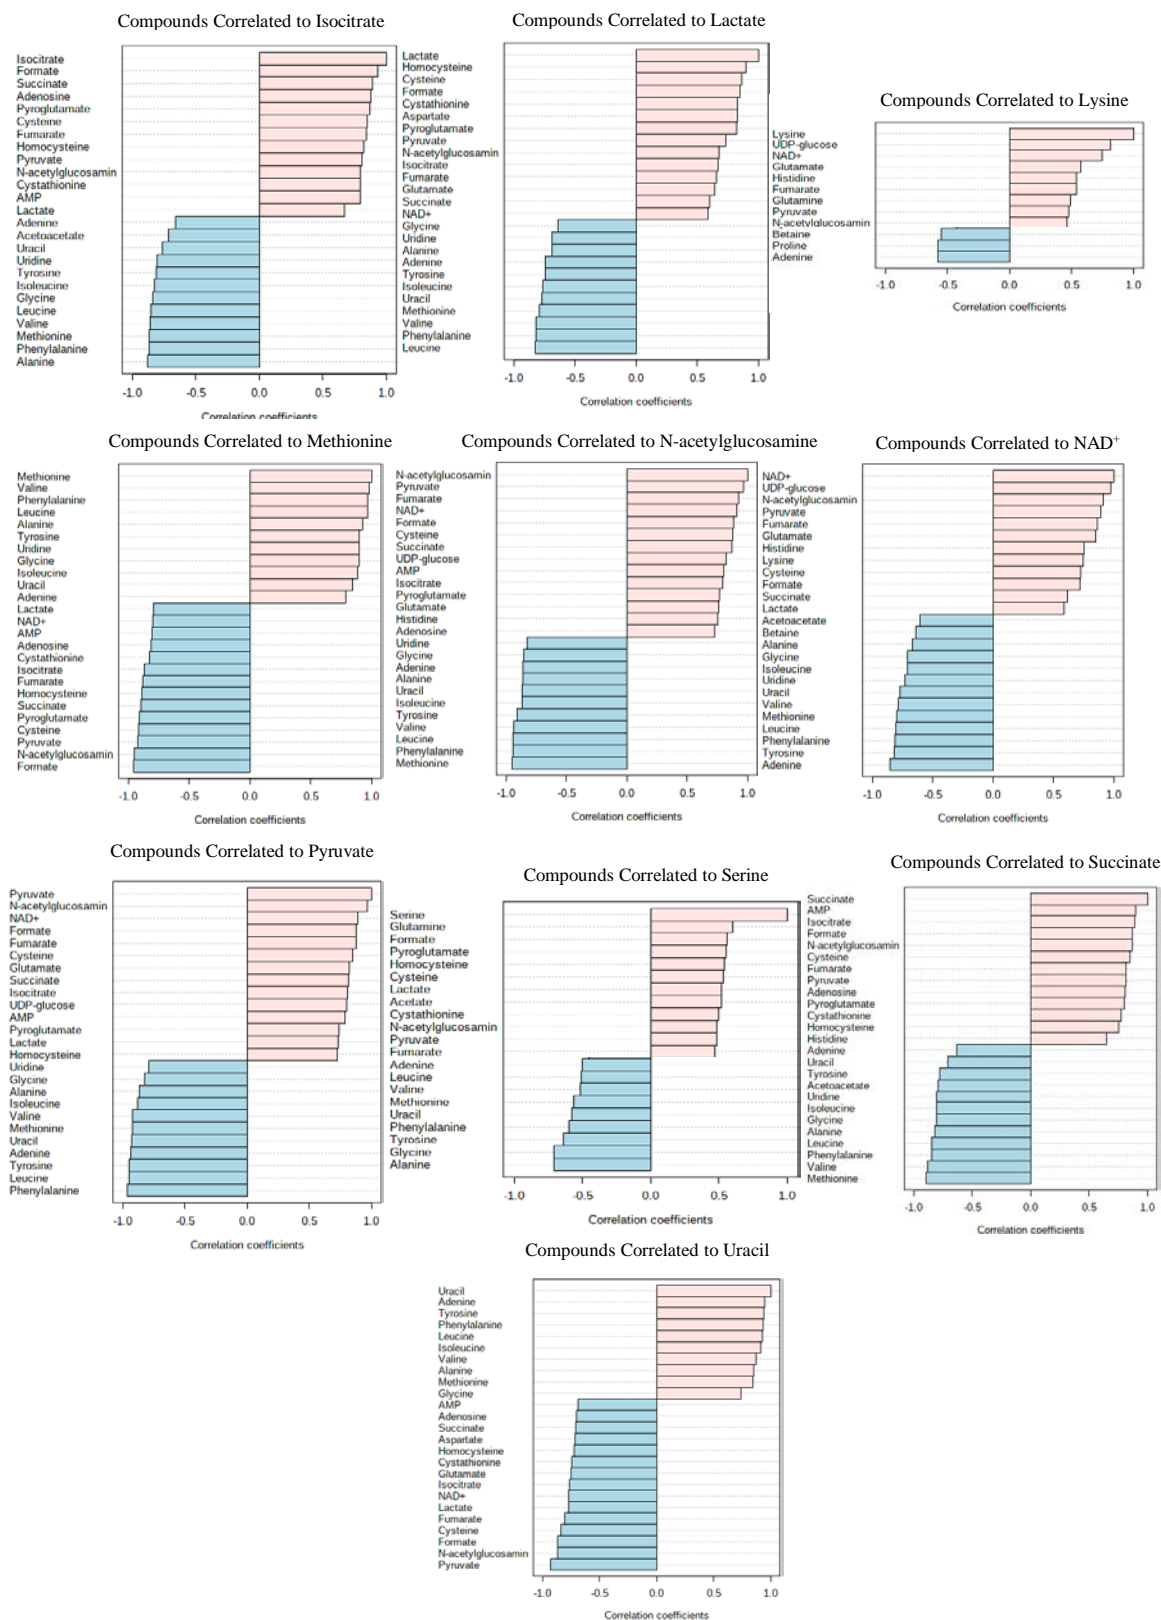

**Figure S17.** Pattern Hunter Correlations between Metabolites Observed in the Mid Log Phase Comparison of Challenged Mutant and Unchallenged Wild Type Samples.

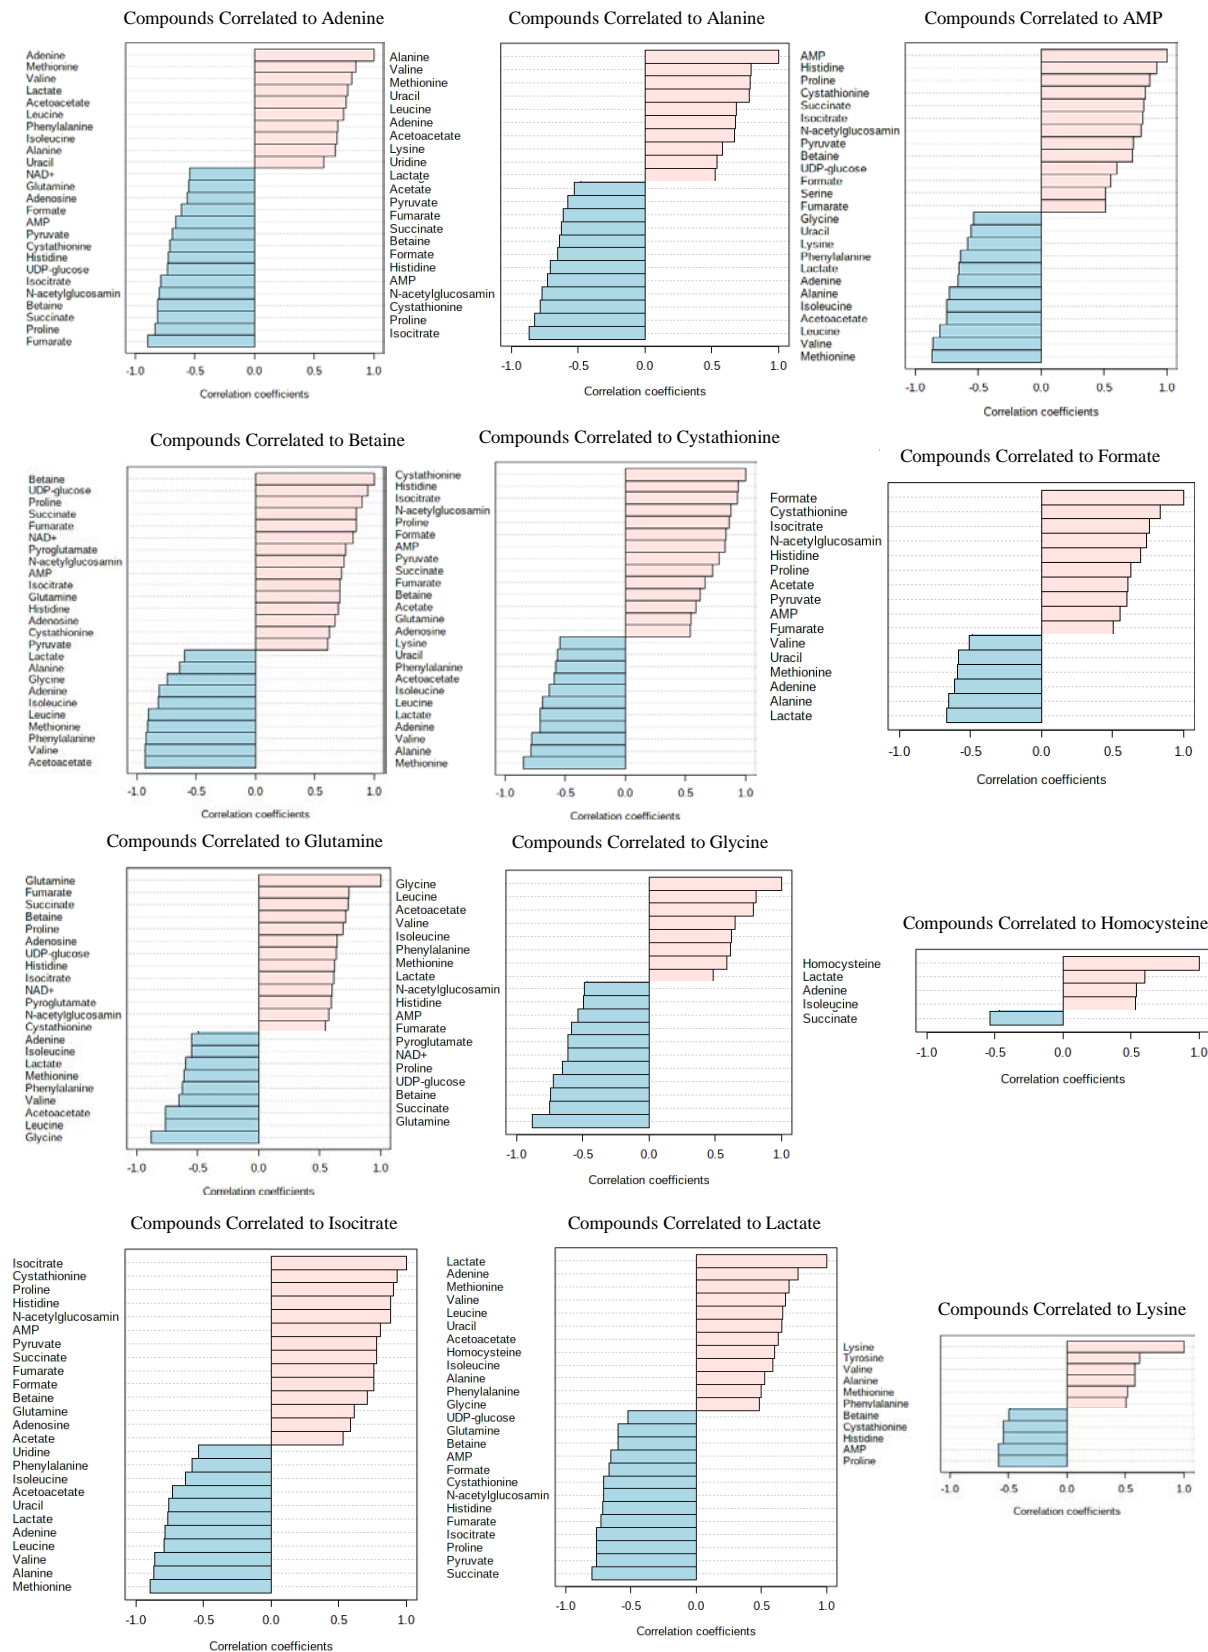

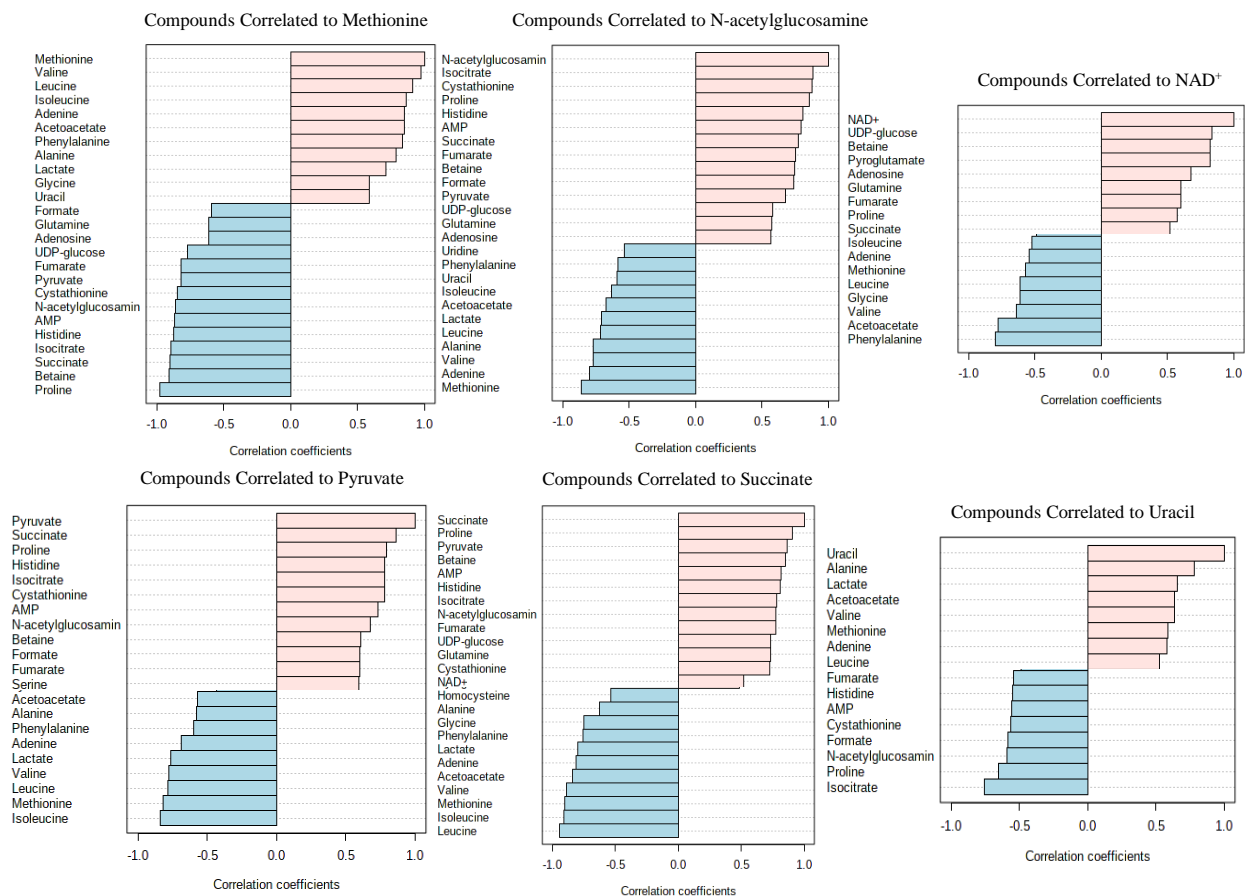

**Figure S18.** Pattern Hunter Correlations between Metabolites Observed in the Mid Log Phase Comparison of Unchallenged Mutant and Challenged Wild Type Samples.

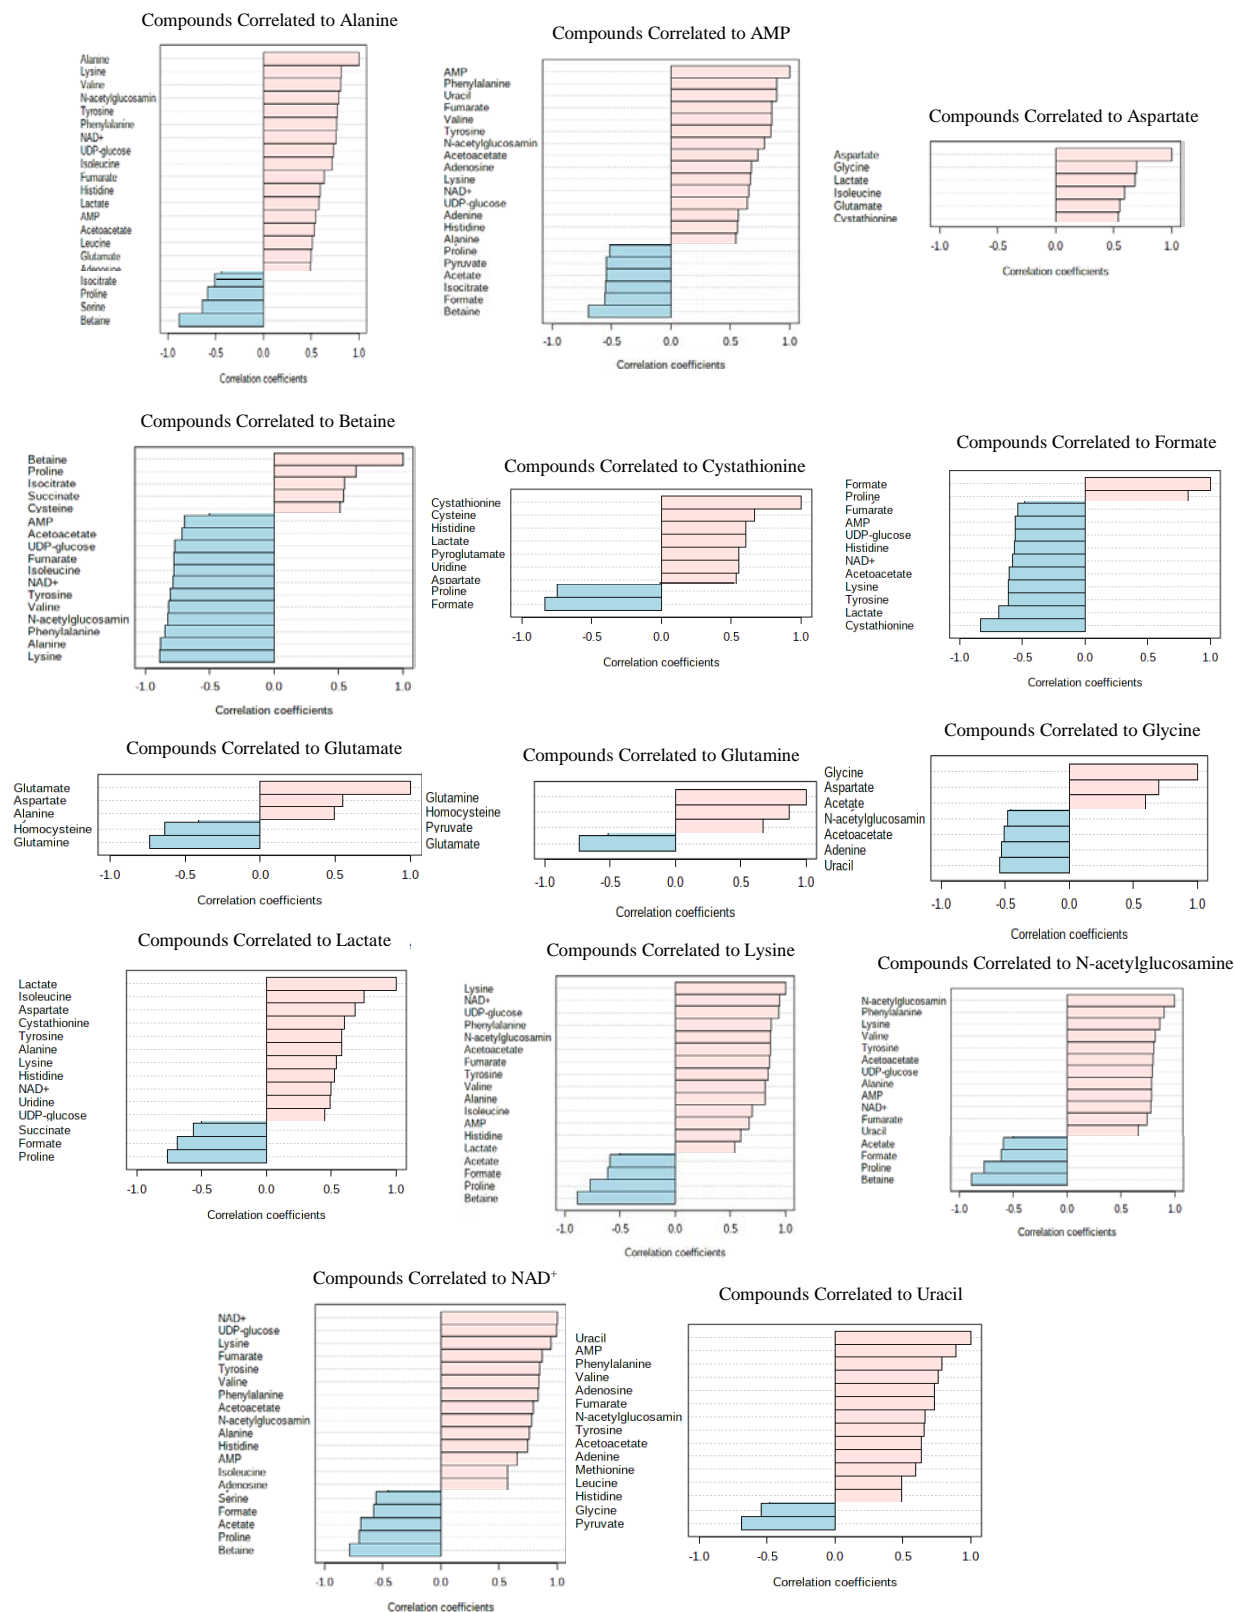

**Figure S19.** Pattern Hunter Correlations between Metabolites Observed in the Stationary Phase Comparison of Unchallenged Mutant and Unchallenged Wild Type Samples.

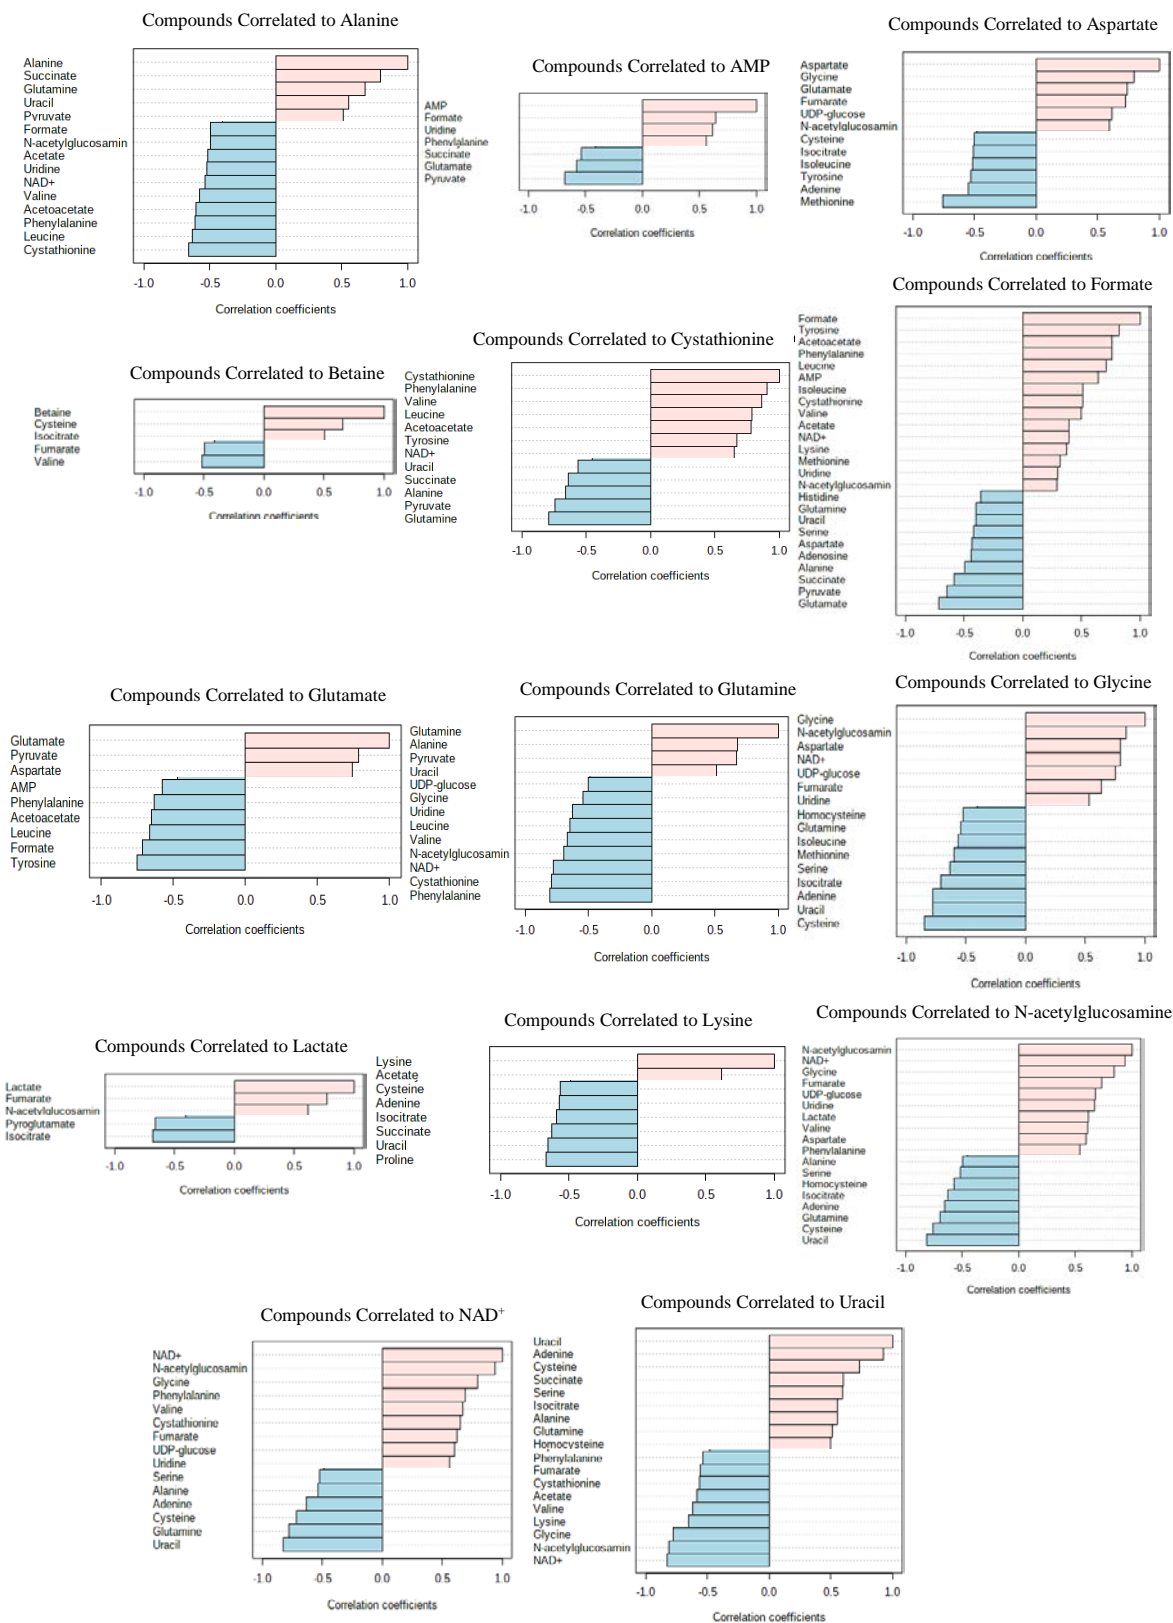

**Figure S20.** Pattern Hunter Correlations between Metabolites Observed in the Stationary Phase Comparison of Challenged Mutant and Challenged Wild Type Samples.

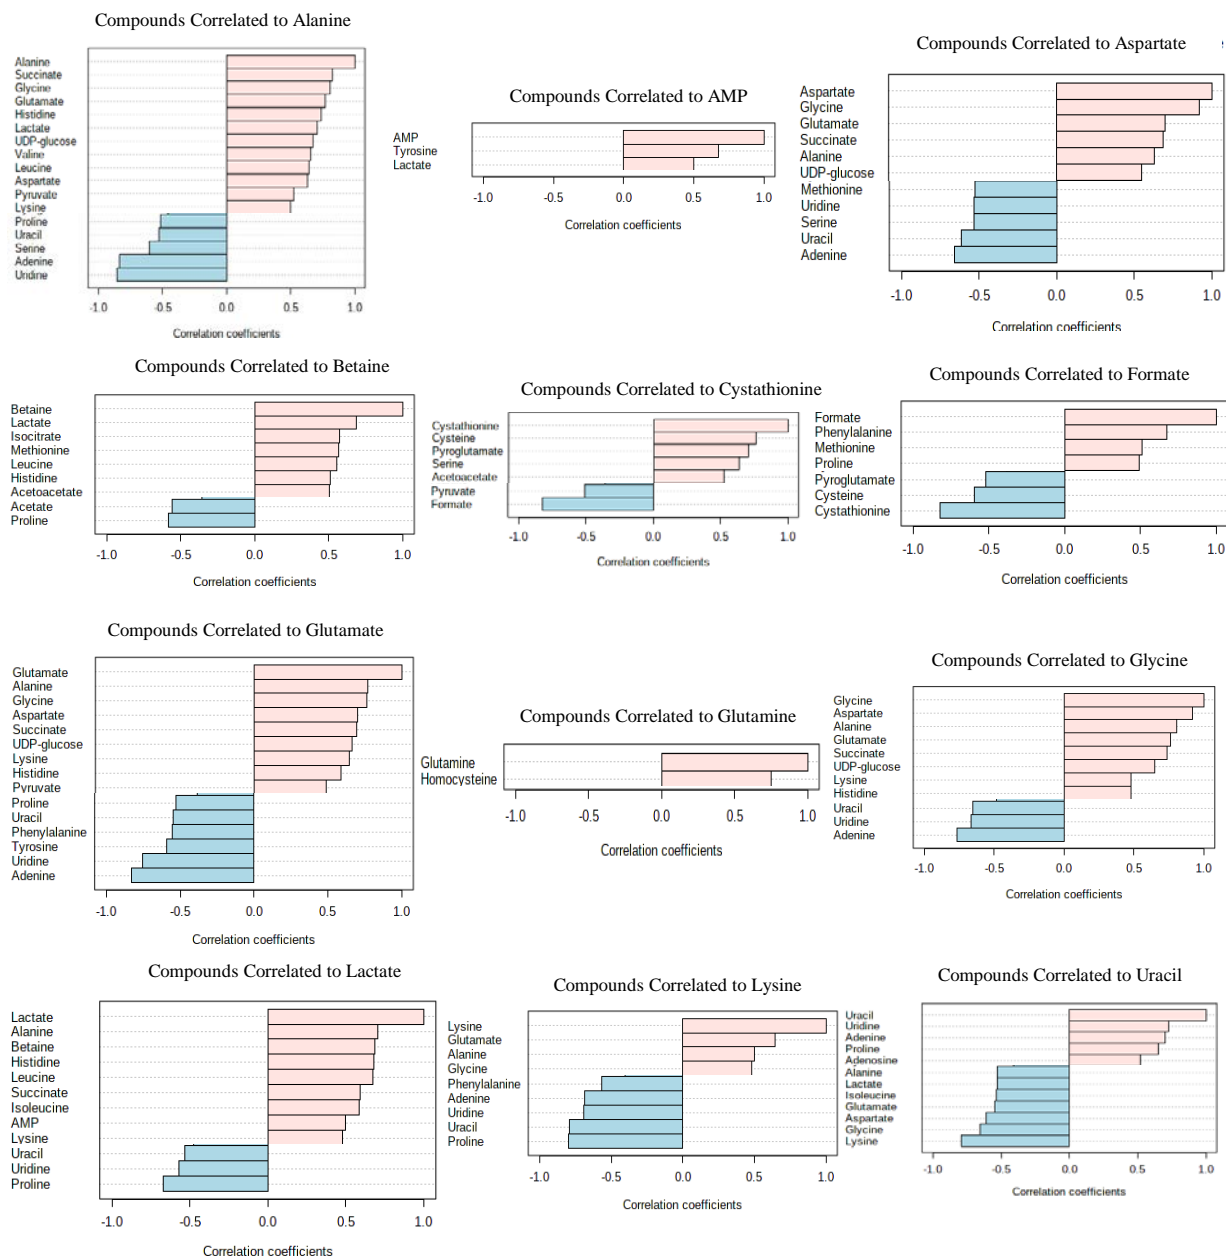

**Figure S21.** Pattern Hunter Correlations between Metabolites Observed in the Stationary Phase Comparison of Challenged and Unchallenged Wild Type Samples.



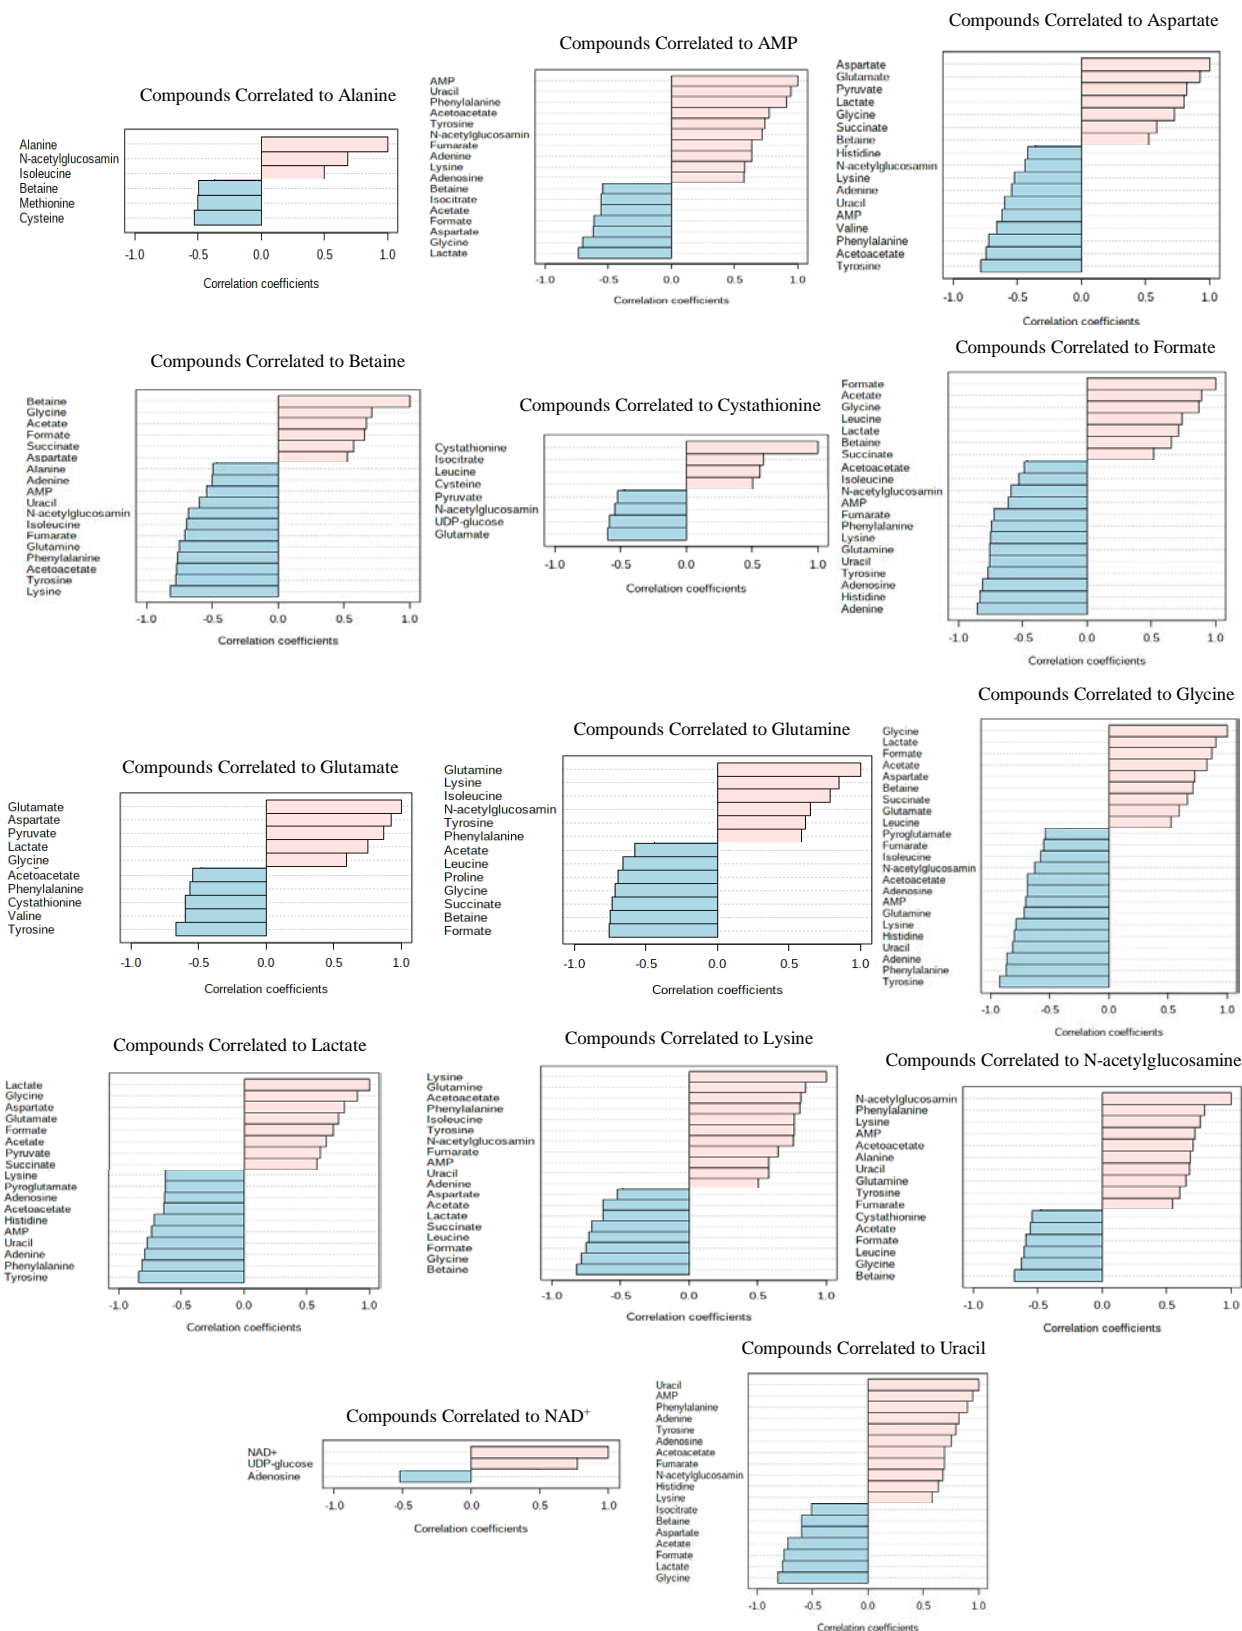

**Figure S22.** Pattern Hunter Correlations between Metabolites Observed in the Stationary Phase Comparison of Challenged and Unchallenged Mutant Samples.

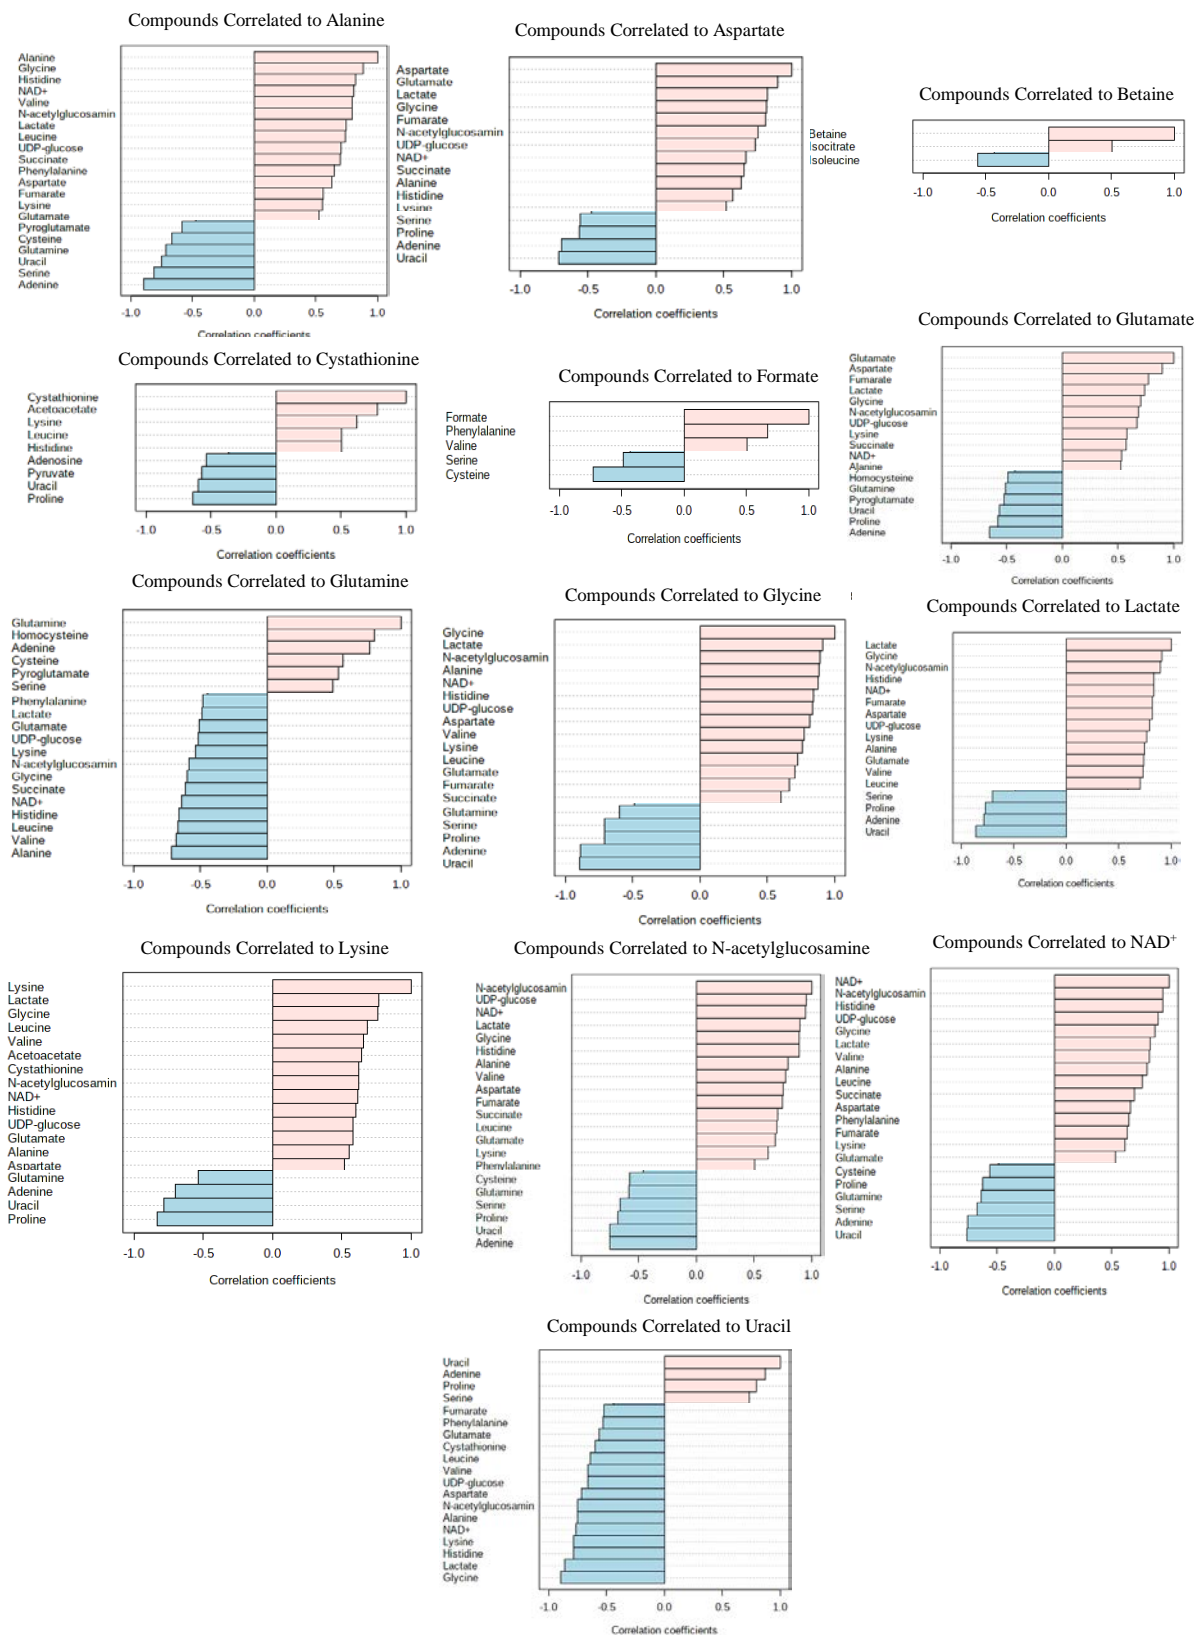

**Figure S23.** Pattern Hunter Correlations between Metabolites Observed in the Stationary Phase Comparison of Challenged Mutant and Unchallenged Wild Type Samples.



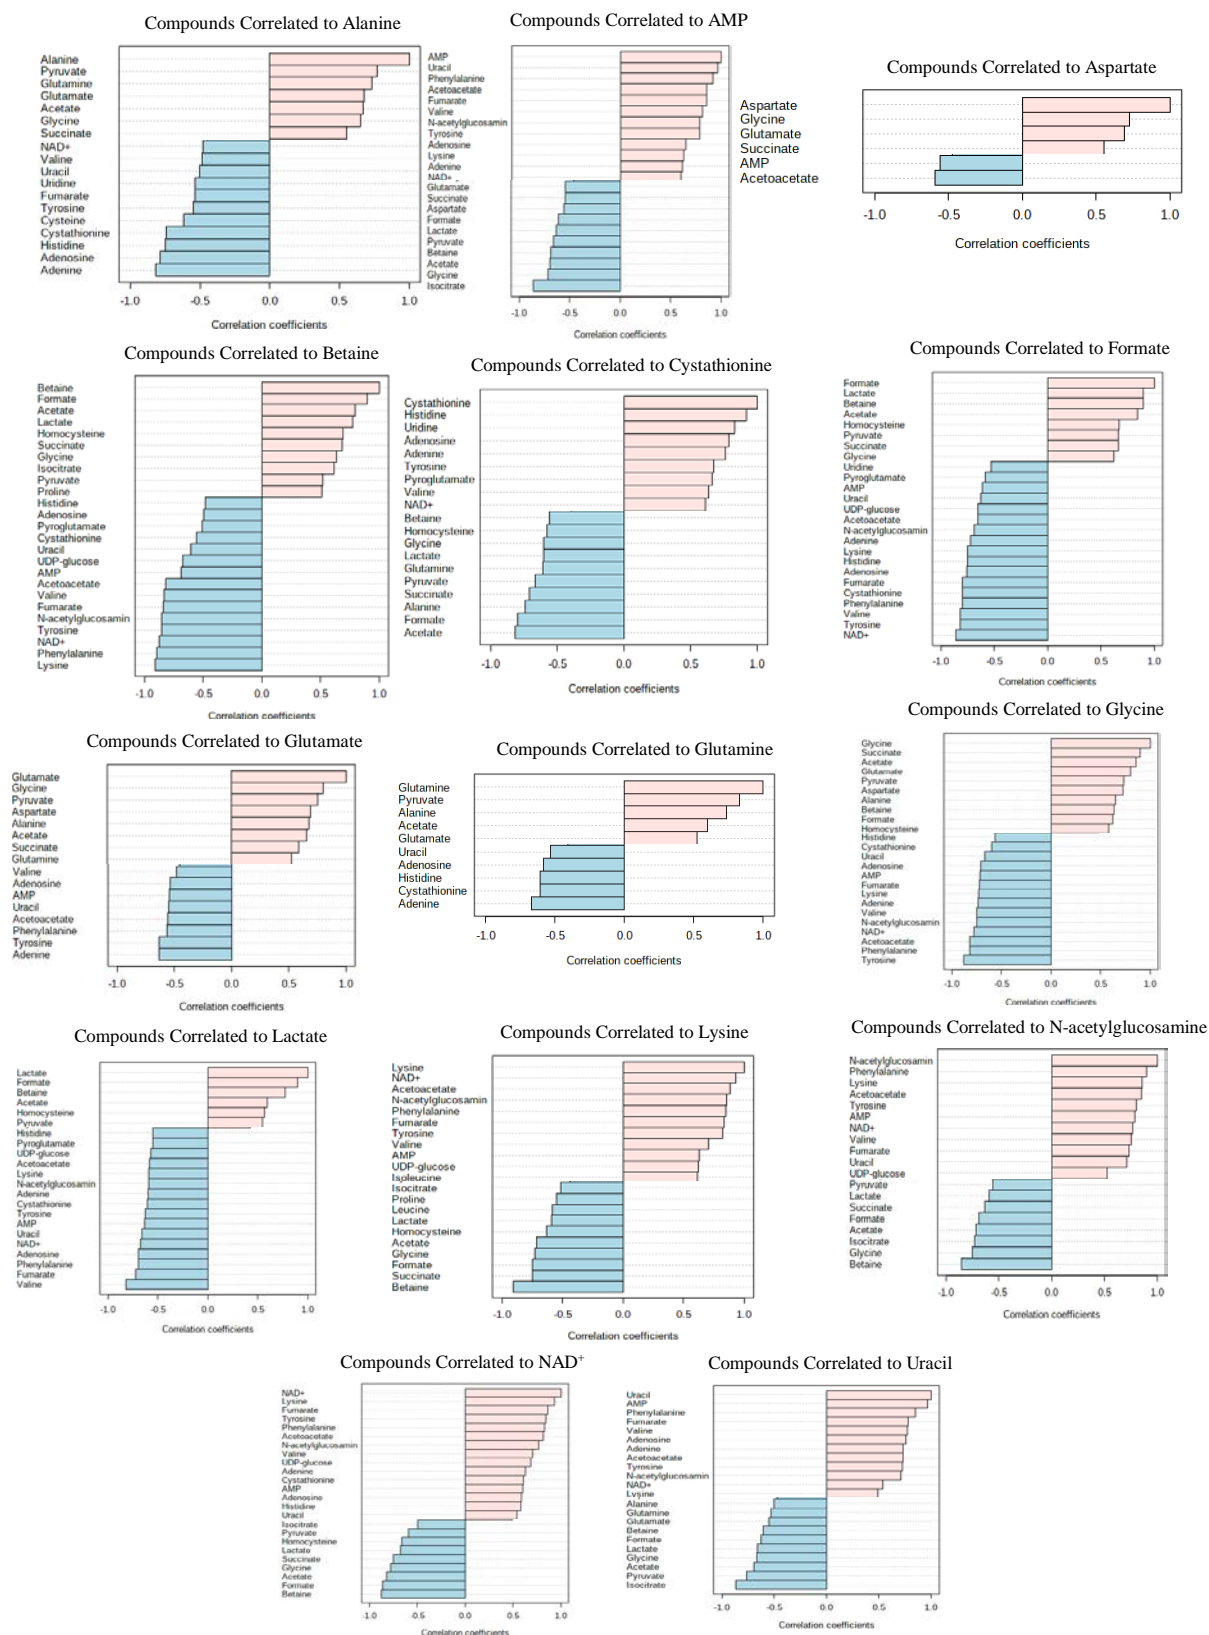

**Figure S24.** Pattern Hunter Correlations between Metabolites Observed in the Stationary Phase Comparison of Challenged Wild Type and Unchallenged Mutant Samples.

**Table S4.** The Identification Number Corresponding to Pathways Found in Pathway Analysis for Figures S25 – S36.

| Identity Number | Pathways                                     |
|-----------------|----------------------------------------------|
| 1               | Aminoacyl-tRNA Biosynthesis                  |
| 2               | Alanine Metabolism                           |
| 3               | Methionine Metabolism                        |
| 4               | Glycine Metabolism                           |
| 5               | Nucleotide Metabolism                        |
| 6               | Glutamine and Glutamate Metabolism           |
| 7               | Valine, Leucine, and Isoleucine Biosynthesis |
| 8               | Acetyl-CoA Biosynthesis                      |
| 9               | Pyruvate Metabolism                          |
| 10              | Citric Acid Cycle                            |

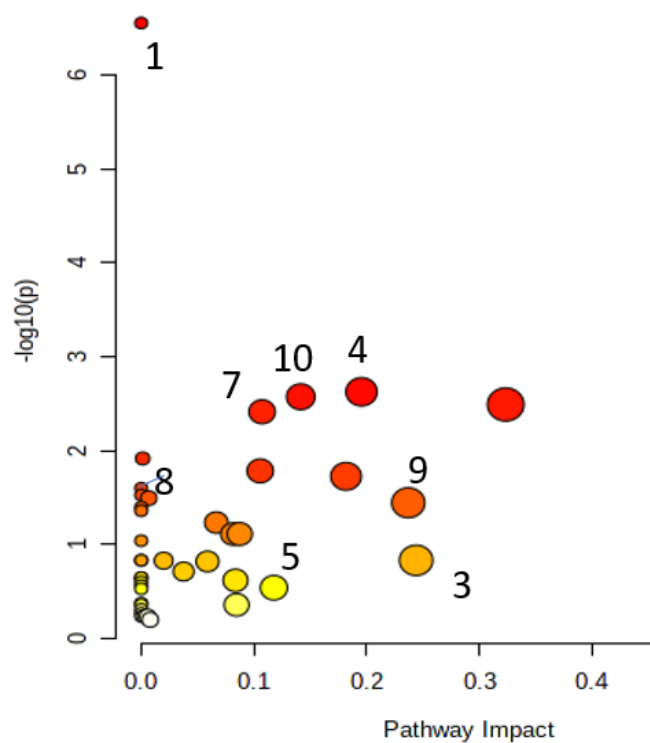

**Figure S25.** Top Impacted Pathways for Mid Log Phase Comparison of Unchallenged Mutant and Unchallenged Wild Type Samples. The larger and darker the circles are, the larger the impact the significant metabolites have on the listed pathway.

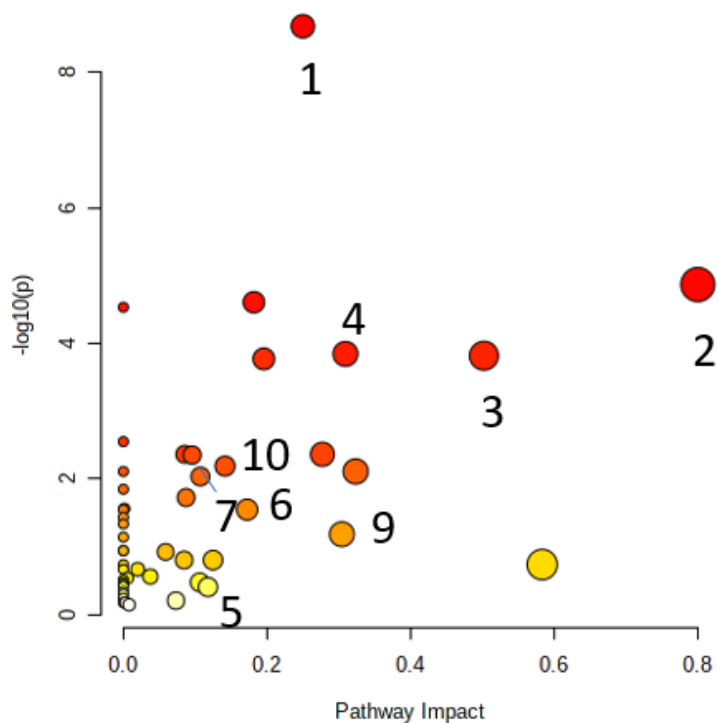

**Figure S26.** Top Impacted Pathways for Mid Log Phase Comparison of Challenged Mutant and Challenged Wild Type Samples. The larger and darker the circles are, the larger the impact the significant metabolites have on the listed pathway.

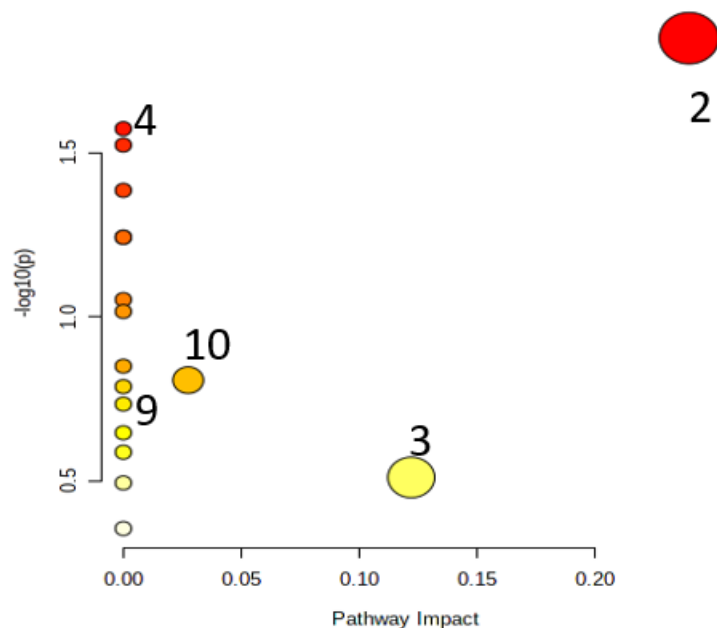

**Figure S27.** Top Impacted Pathways for Mid Log Phase Comparison of Challenged and Unchallenged Wild Type Samples. The larger and darker the circles are, the larger the impact the significant metabolites have on the listed pathway.

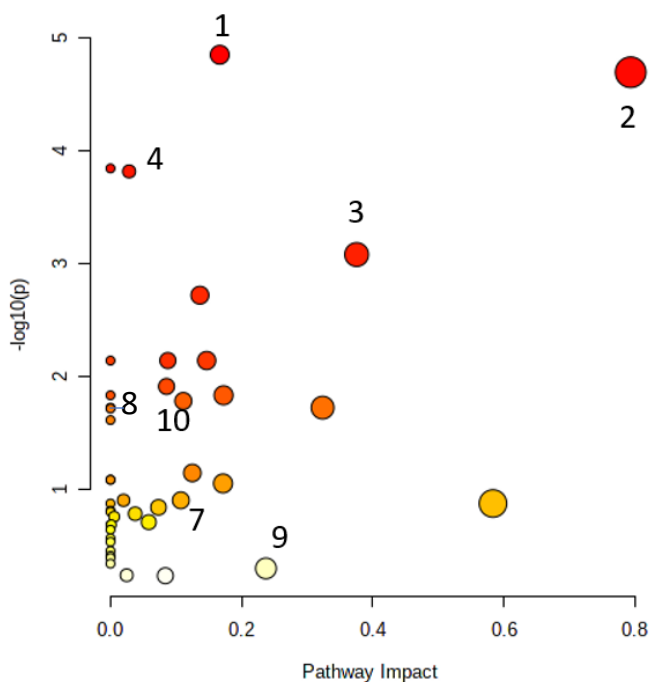

**Figure S28.** Top Impacted Pathways for Mid Log Phase Comparison of Challenged and Unchallenged Mutant Samples. The larger and darker the circles are, the larger the impact the significant metabolites have on the listed pathway.

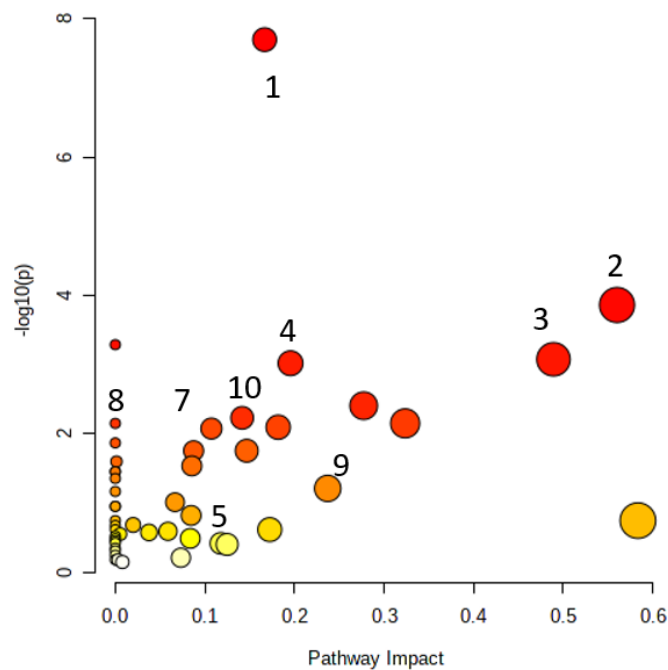

**Figure S29.** Top Impacted Pathways for Mid Log Phase Comparison of Challenged Mutant and Unchallenged Wild Type Samples. The larger and darker the circles are, the larger the impact the significant metabolites have on the listed pathway.

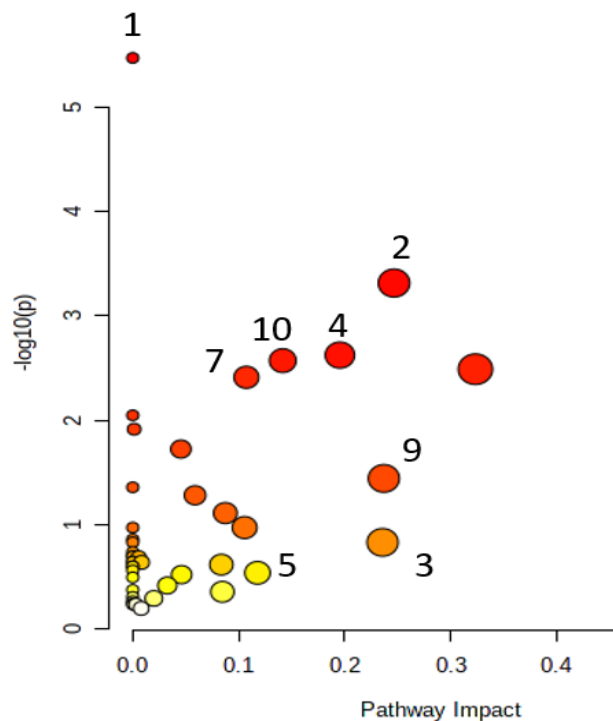

**Figure S30.** Top Impacted Pathways for Mid Log Phase Comparison of Challenged Wild Type and Unchallenged Mutant Samples. The larger and darker the circles are, the larger the impact the significant metabolites have on the listed pathway.

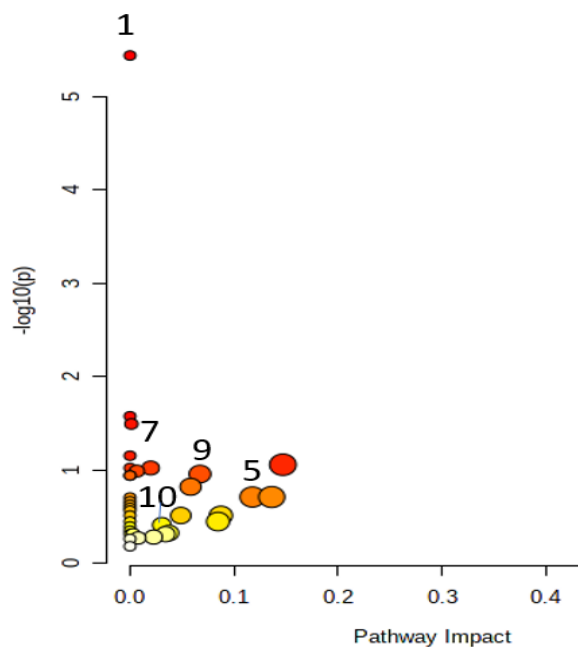

**Figure S31.** Top Impacted Pathways for Stationary Phase Comparison of Unchallenged Mutant and Unchallenged Wild Type Samples. The larger and darker the circles are, the larger the impact the significant metabolites have on the listed pathway.

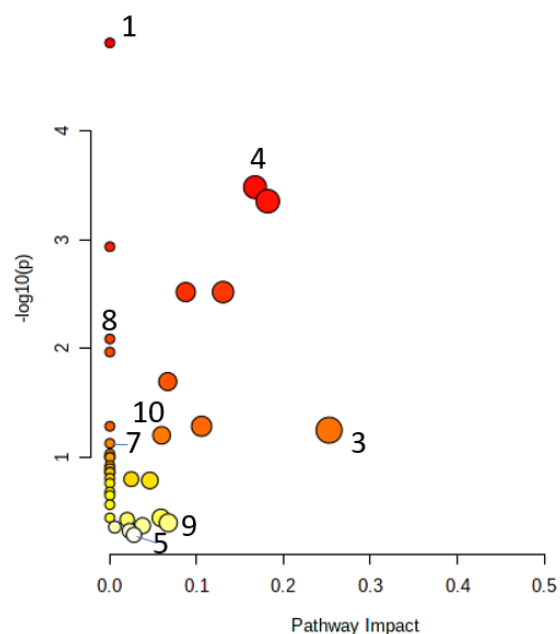

**Figure S32.** Top Impacted Pathways for Stationary Phase Comparison of Challenged Mutant and Challenged Wild Type Samples. The larger and darker the circles are, the larger the impact the significant metabolites have on the listed pathway.

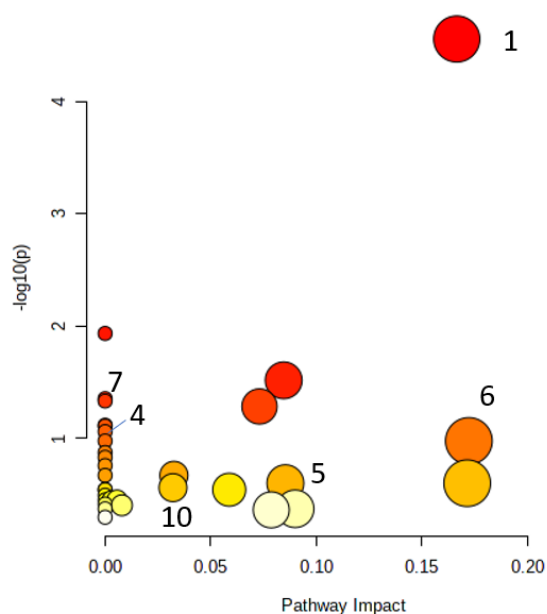

**Figure S33.** Top Impacted Pathways for Stationary Phase Comparison of Challenged and Unchallenged Wild Type Samples. The larger and darker the circles are, the larger the impact the significant metabolites have on the listed pathway.

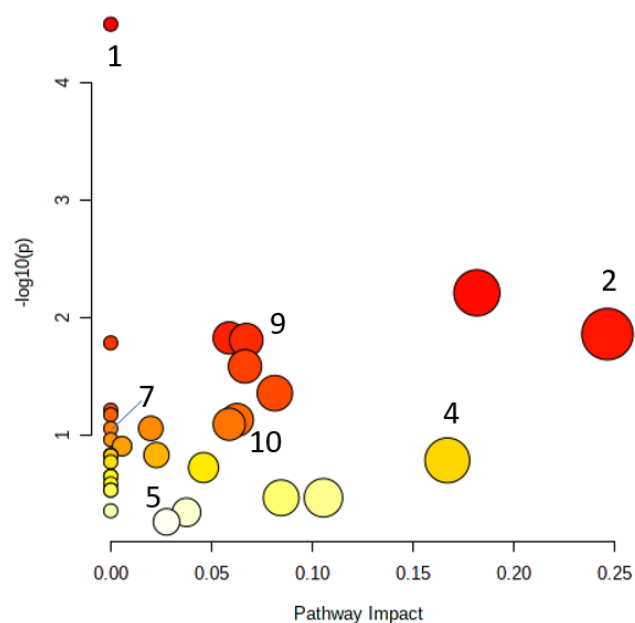

**Figure S34.** Top Impacted Pathways for Stationary Phase Comparison of Challenged and Unchallenged Mutant Samples. The larger and darker the circles are, the larger the impact the significant metabolites have on the listed pathway.

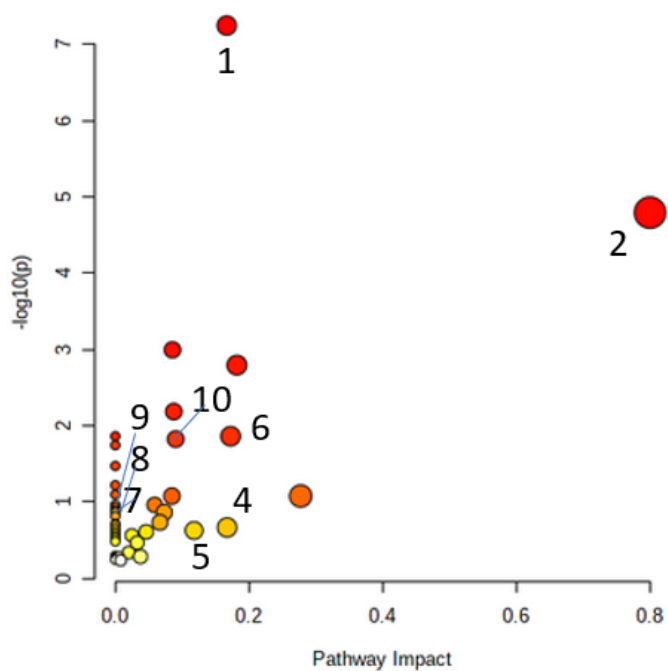

**Figure S35.** Top Impacted Pathways for Stationary Phase Comparison of Challenged Mutant and Unchallenged Wild Type Samples. The larger and darker the circles are, the larger the impact the significant metabolites have on the listed pathway.

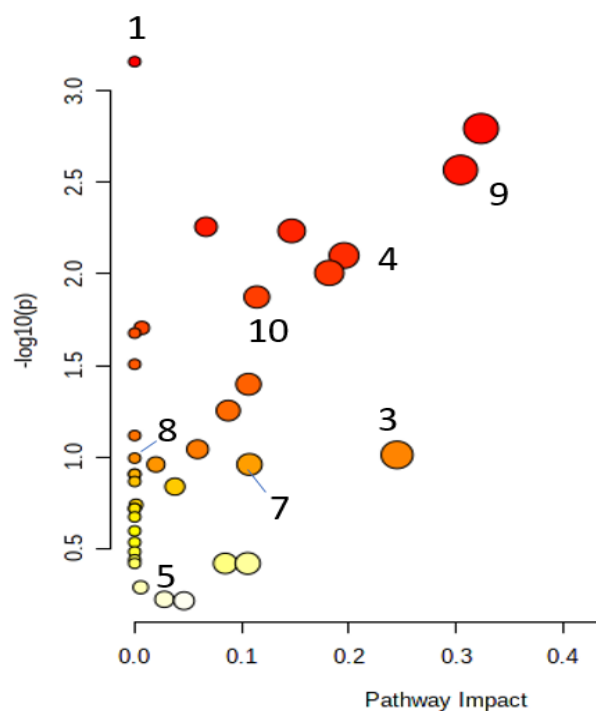

**Figure S36.** Top Impacted Pathways for Stationary Phase Comparison of Challenged Wild Type and Unchallenged Mutant Samples. The larger and darker the circles are, the larger the impact the significant metabolites have on the listed pathway.

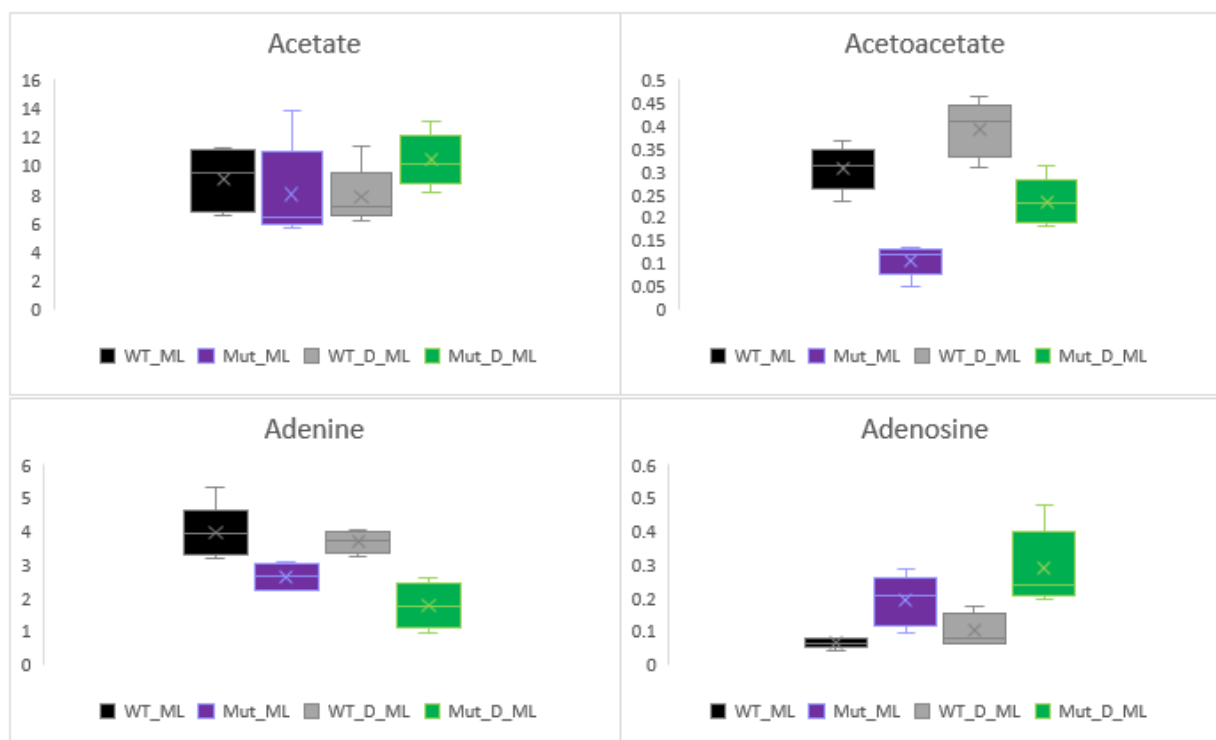



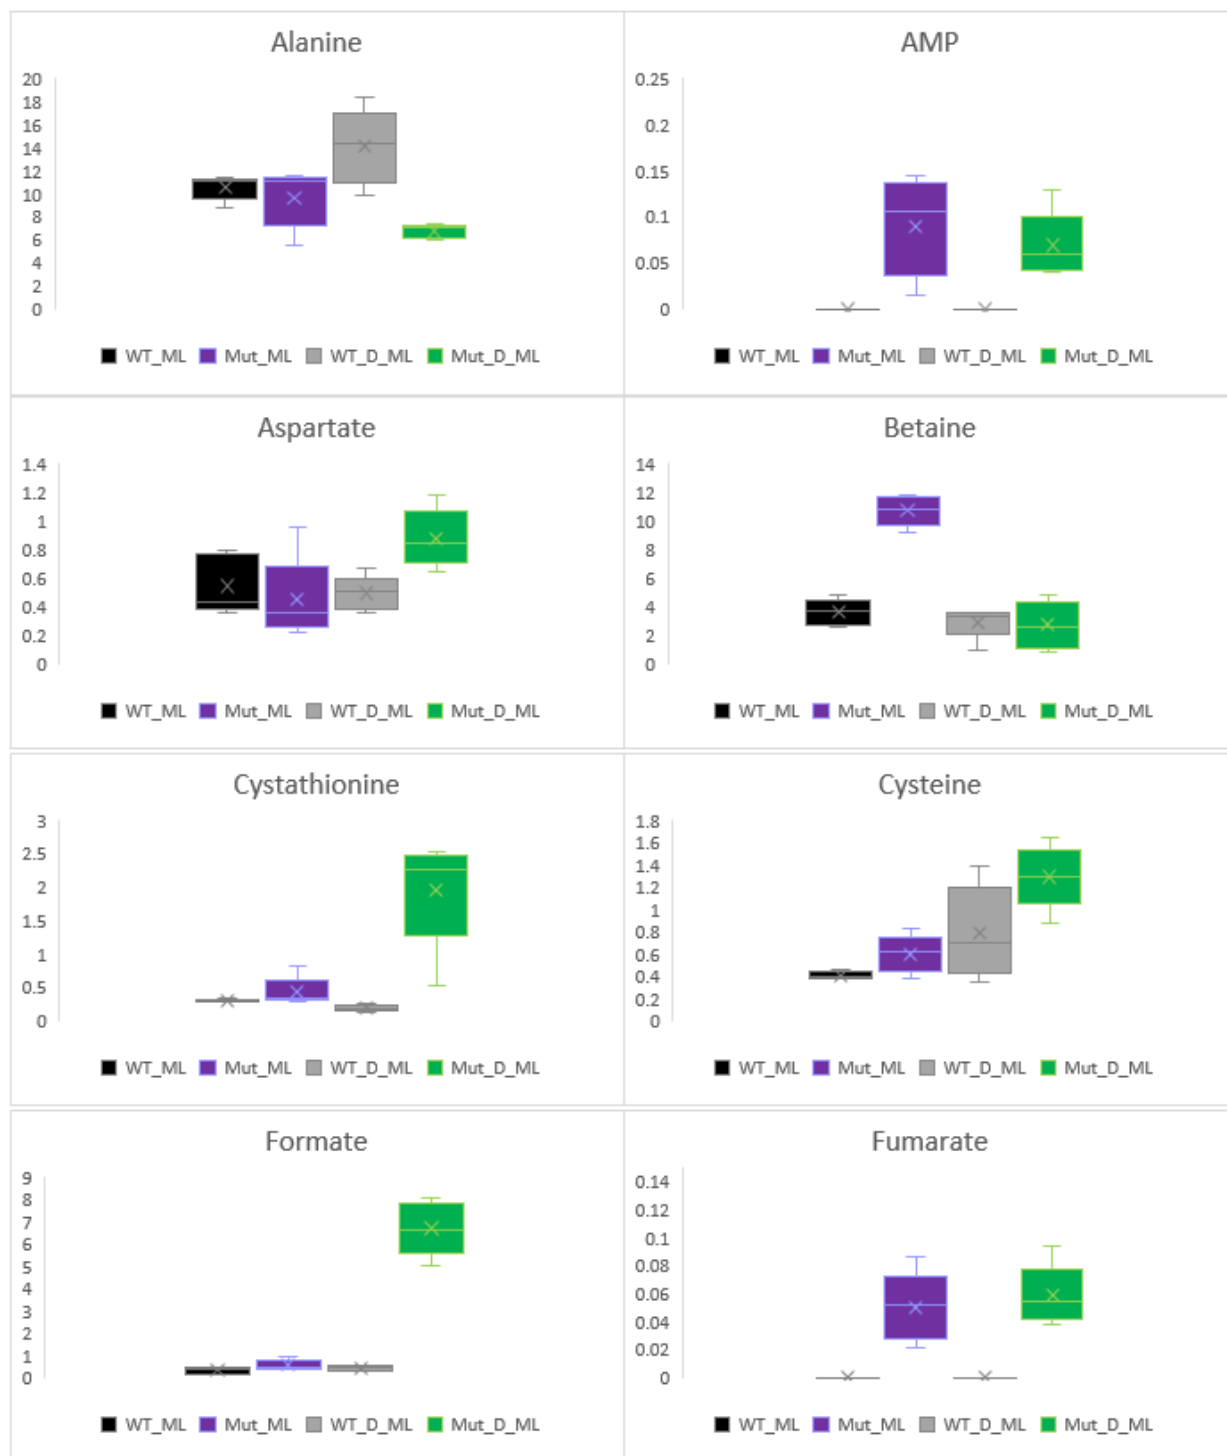

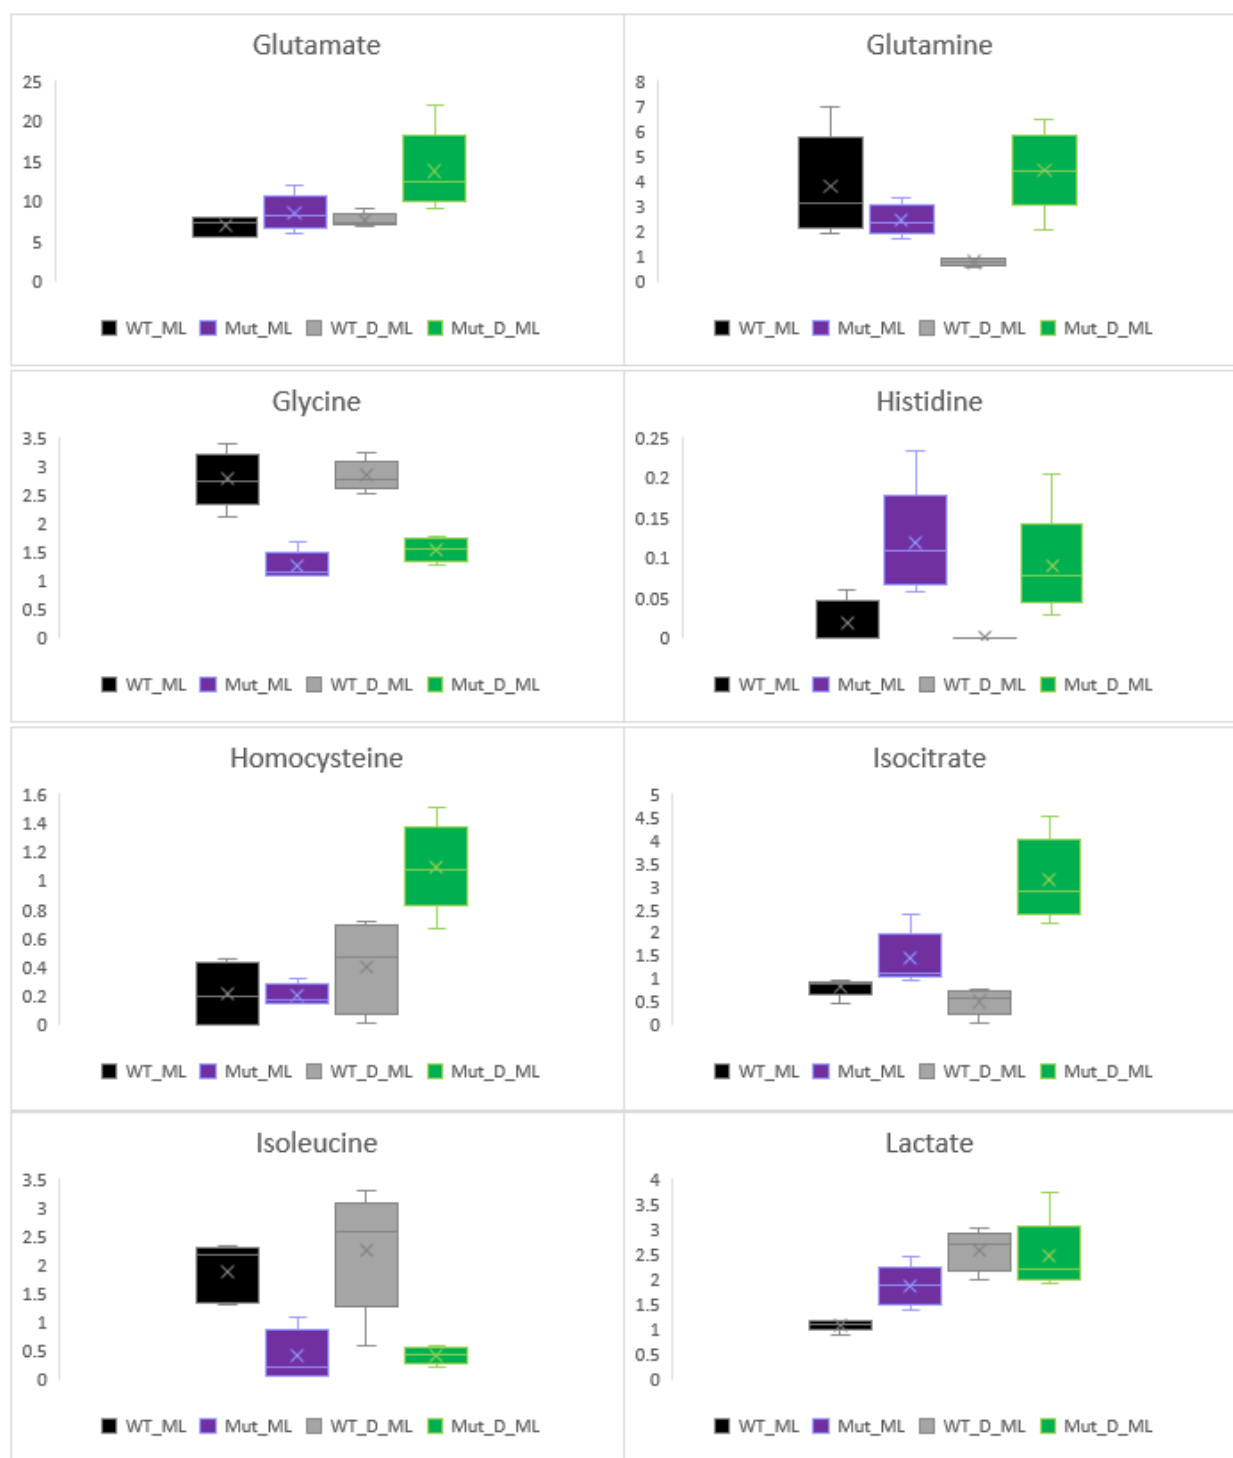

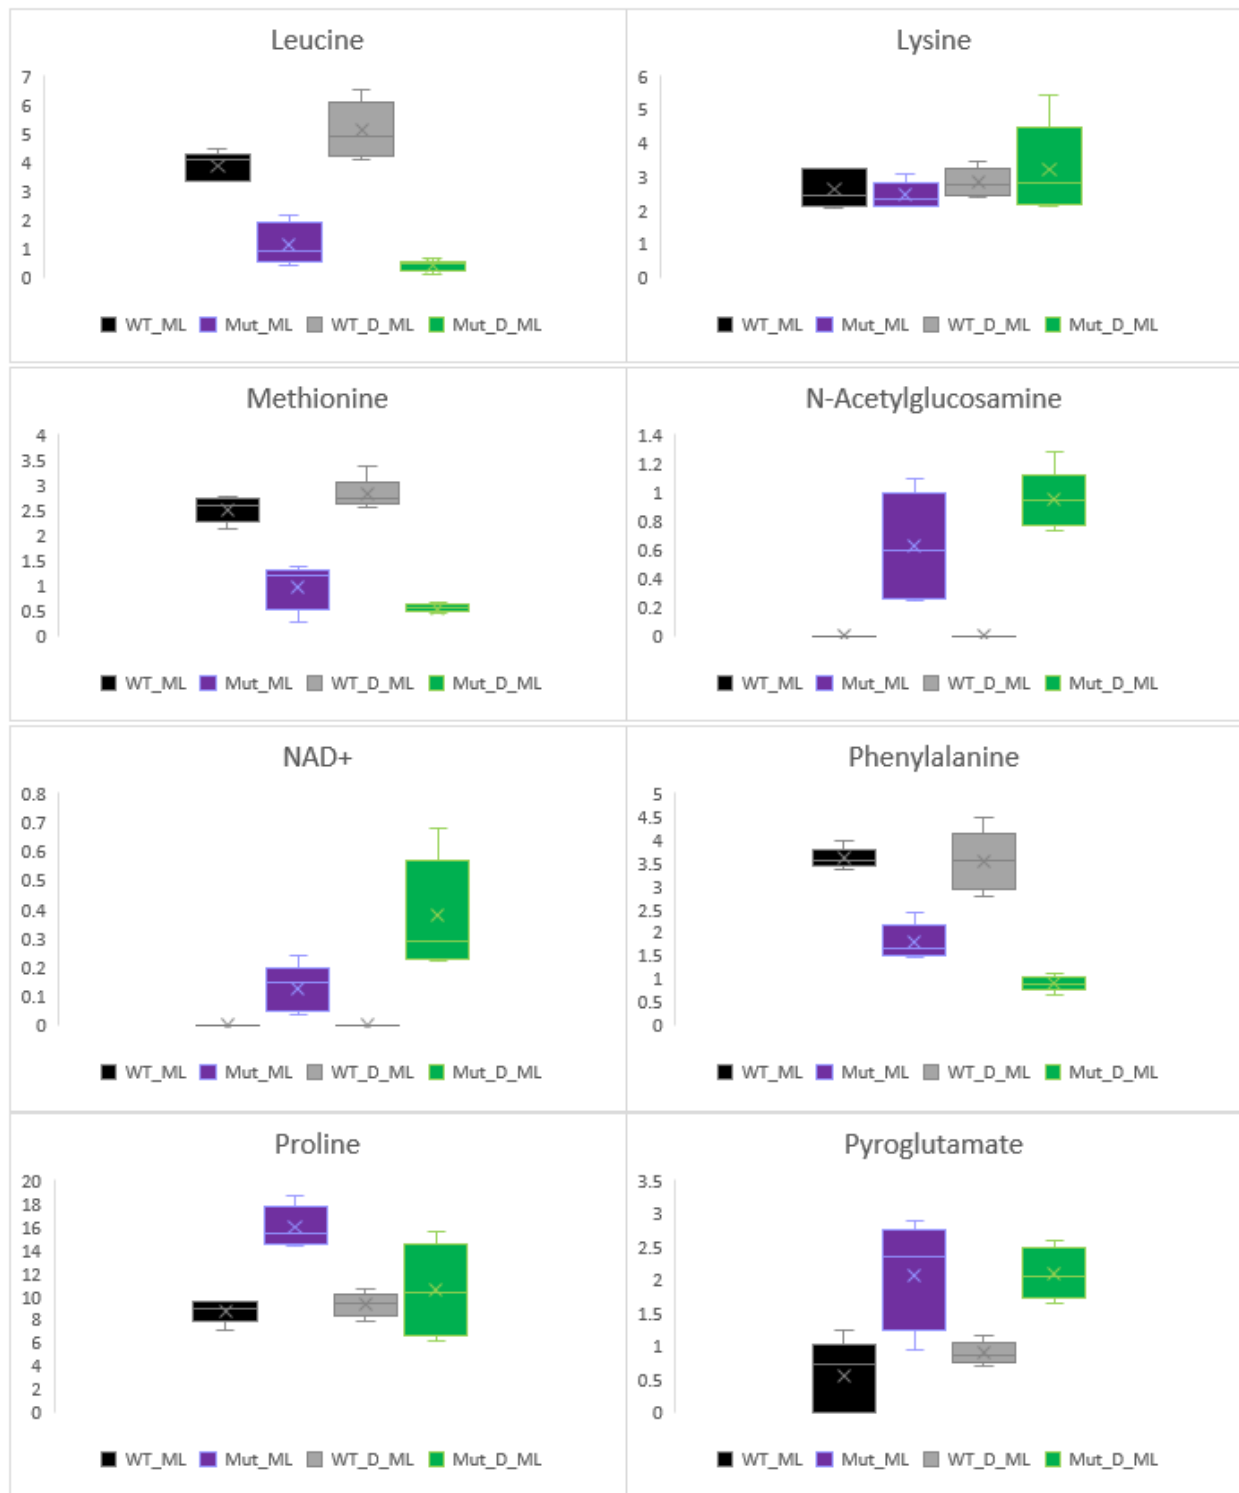

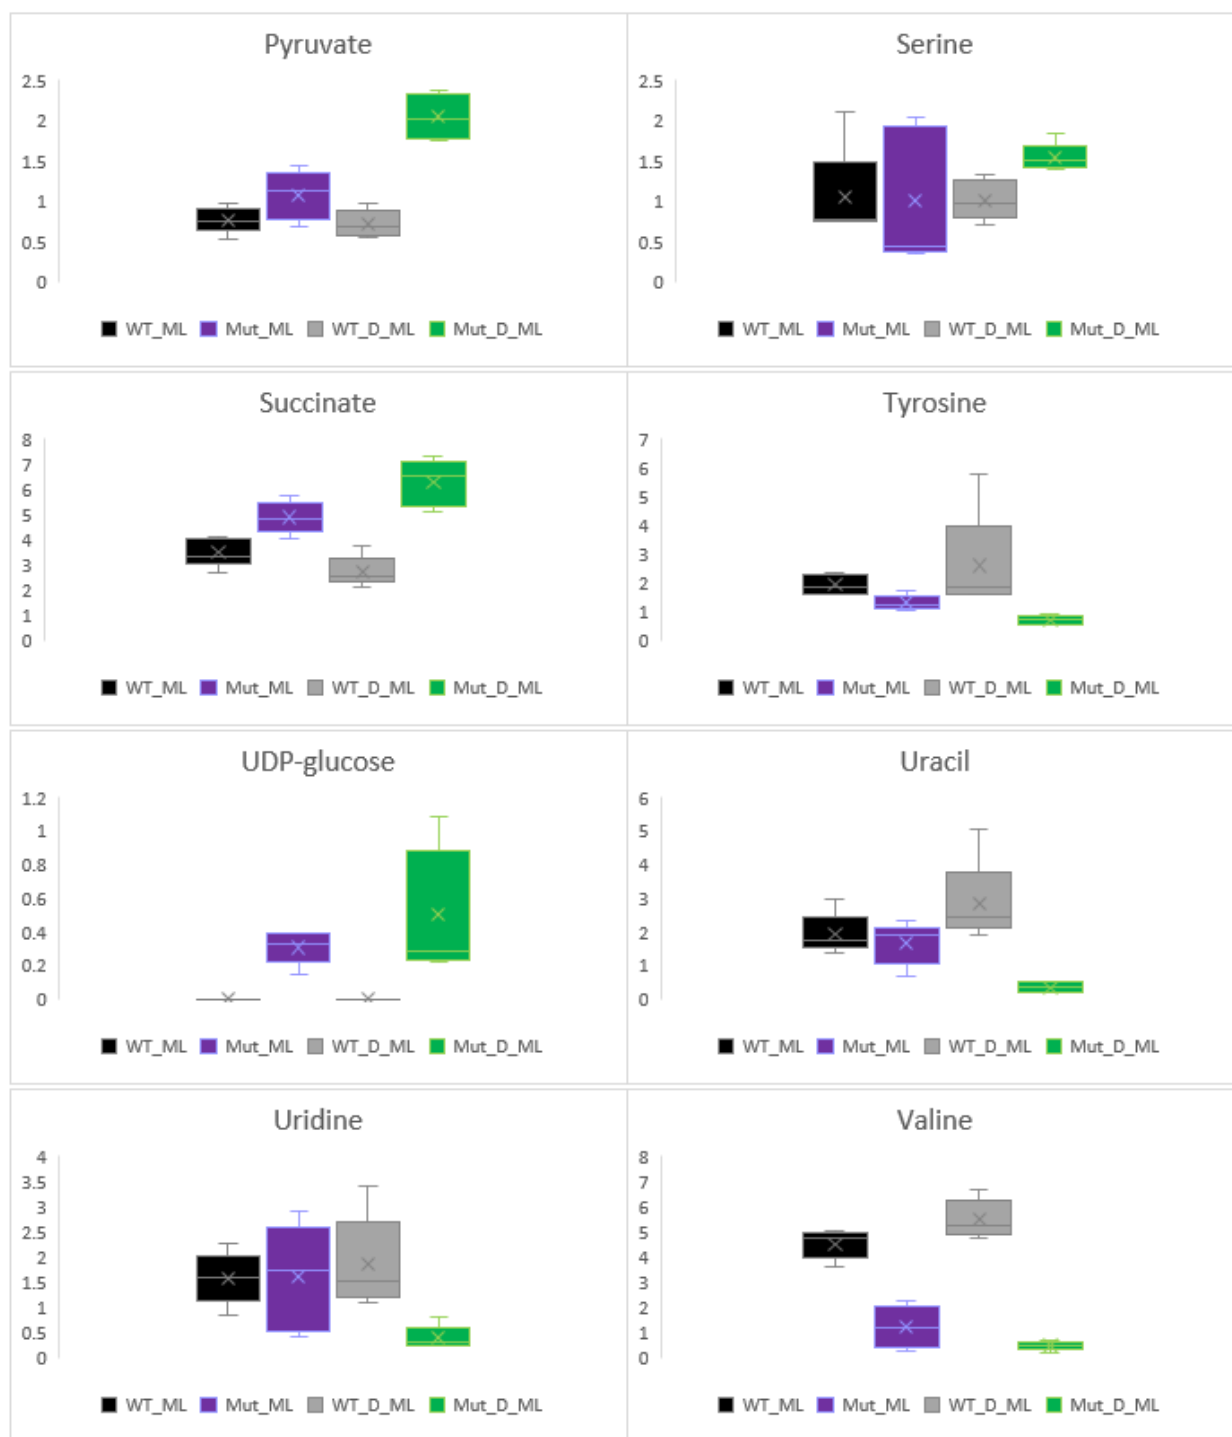

**Figure S37.** Mid Log Phase Metabolite Box and Whisker Plots. The ends of the whiskers are the minimum and maximum values, the center line is the median, the x is the mean, and the colored middle “box” encompasses the middle 50% of scores for the group.

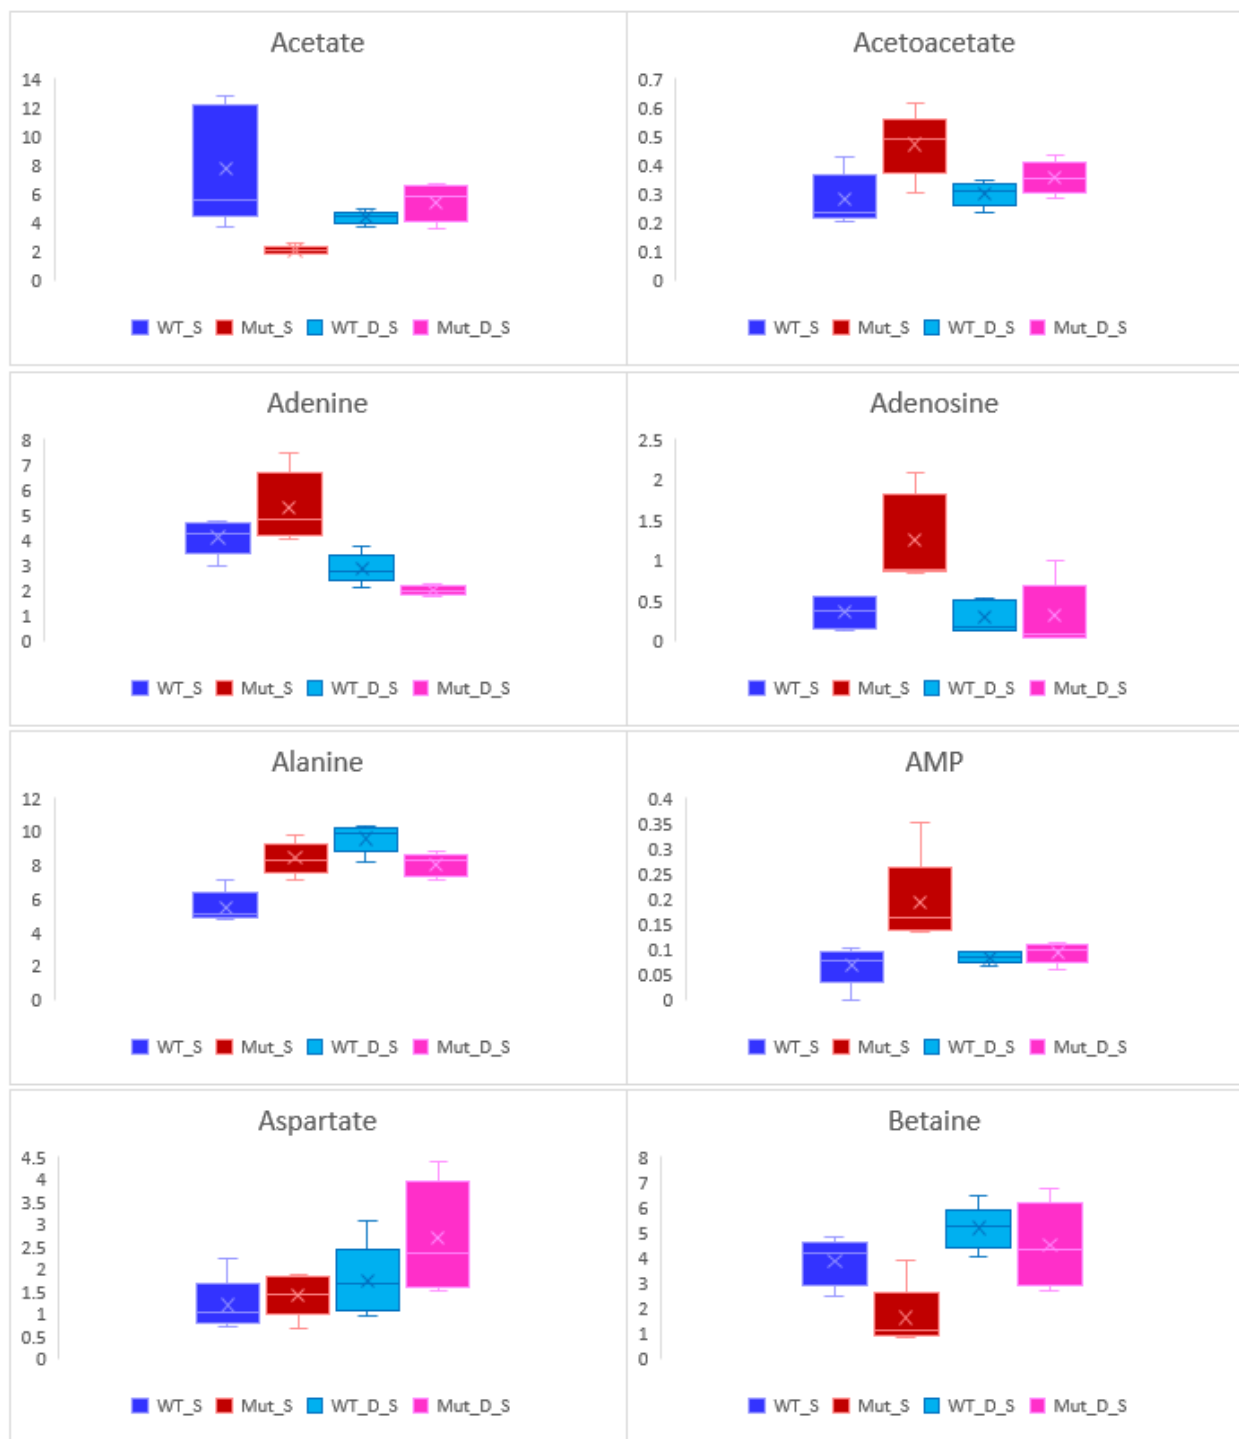

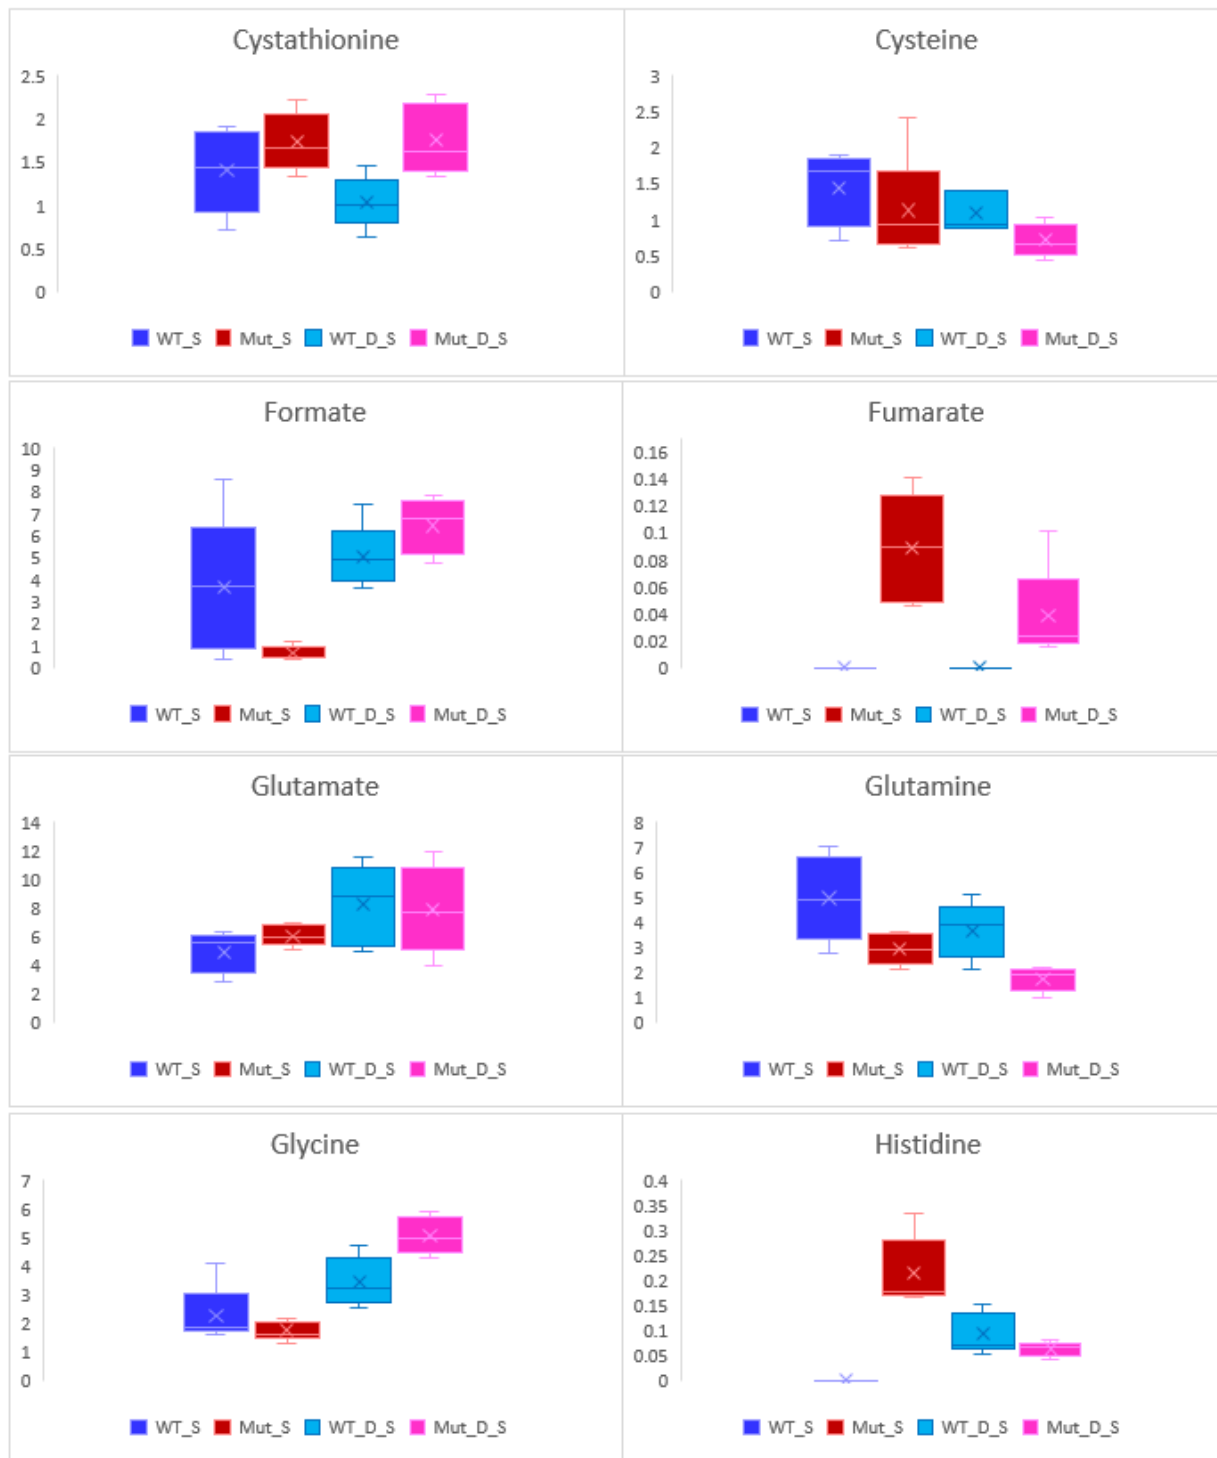

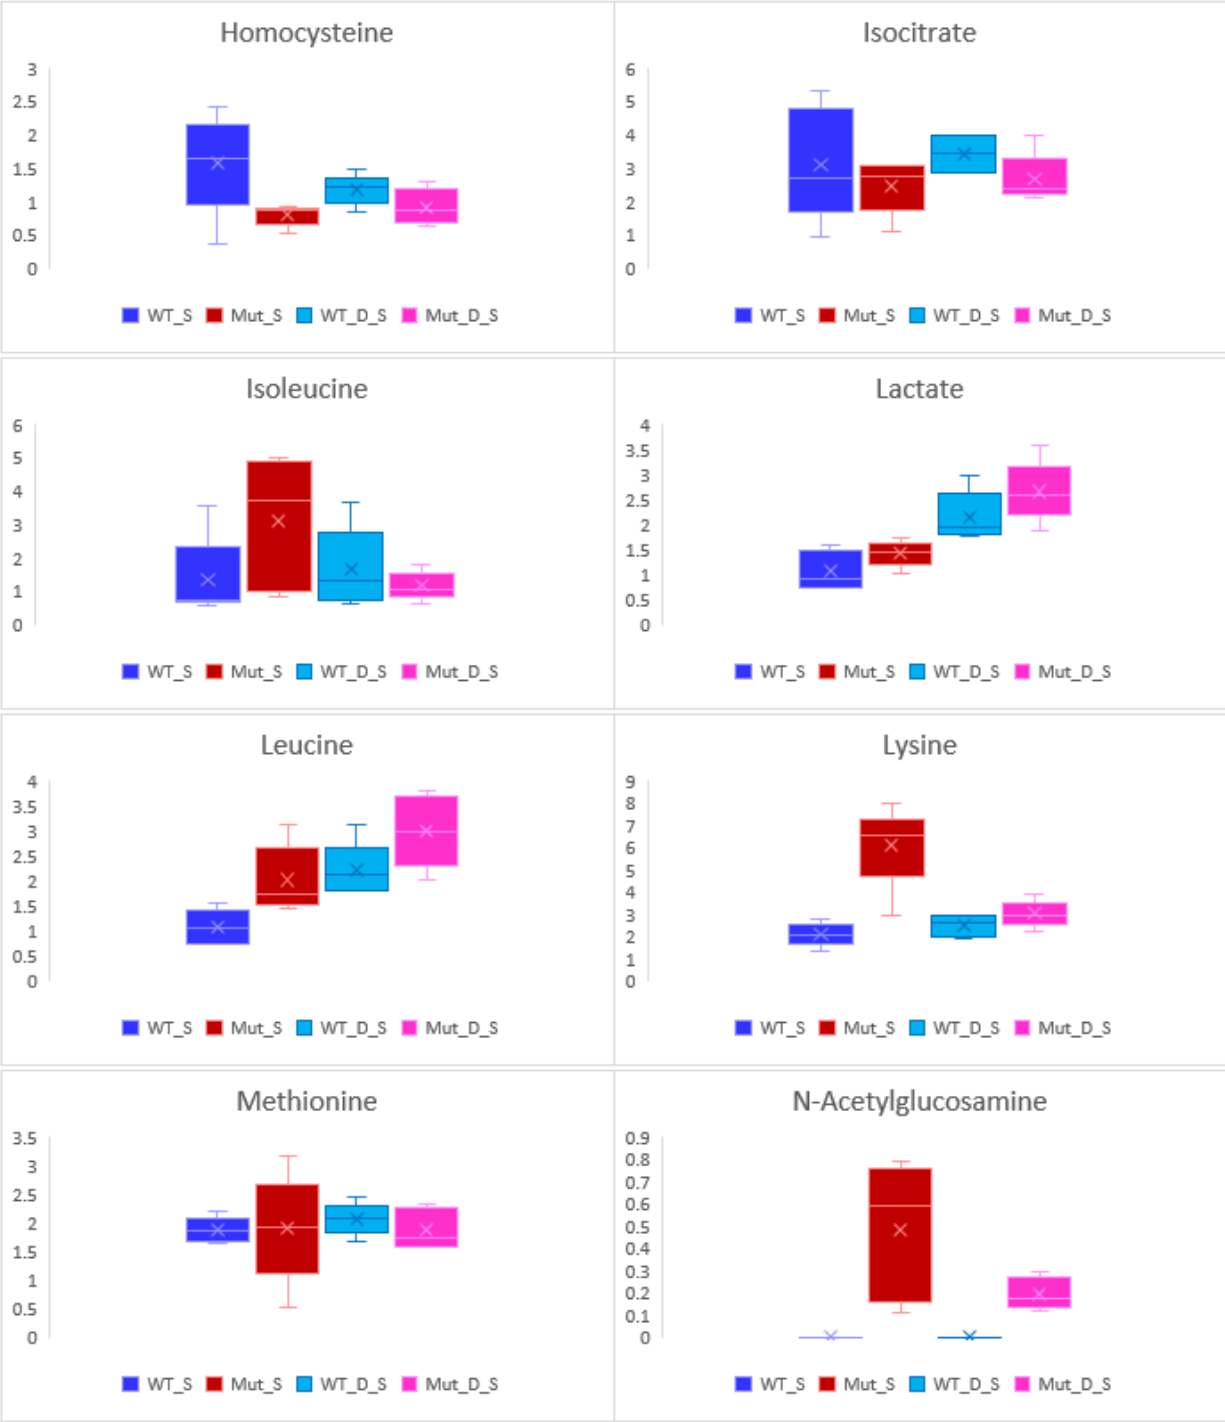

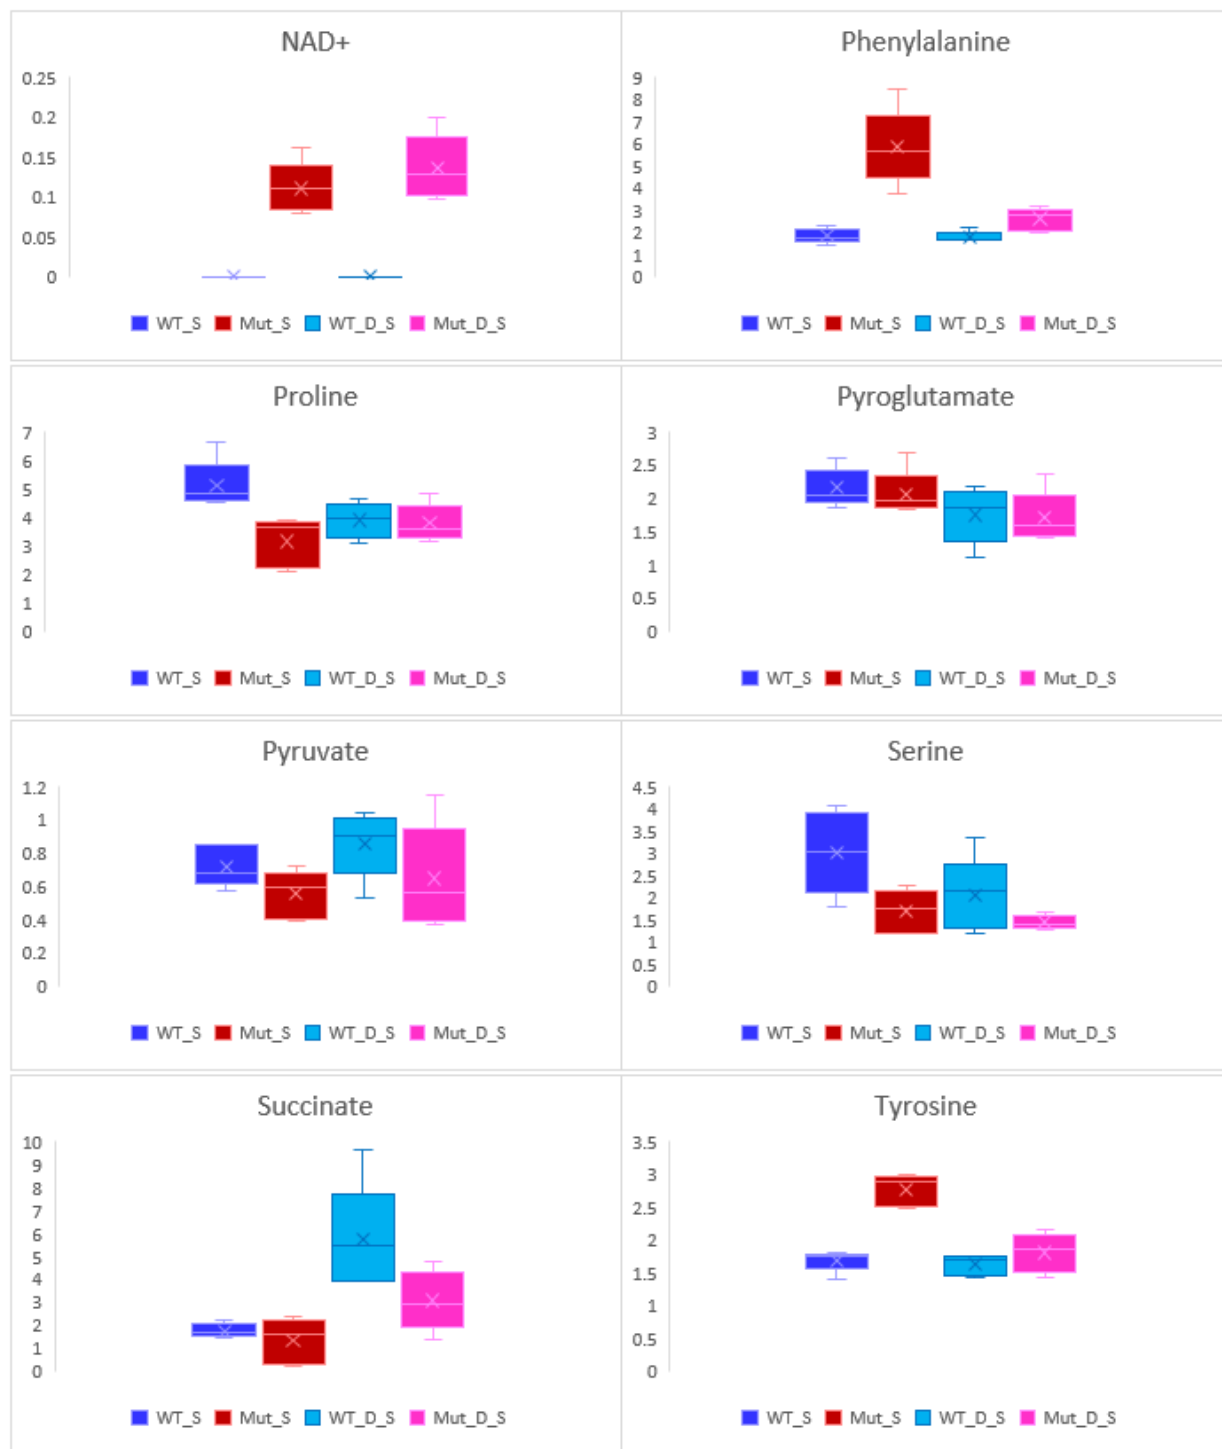



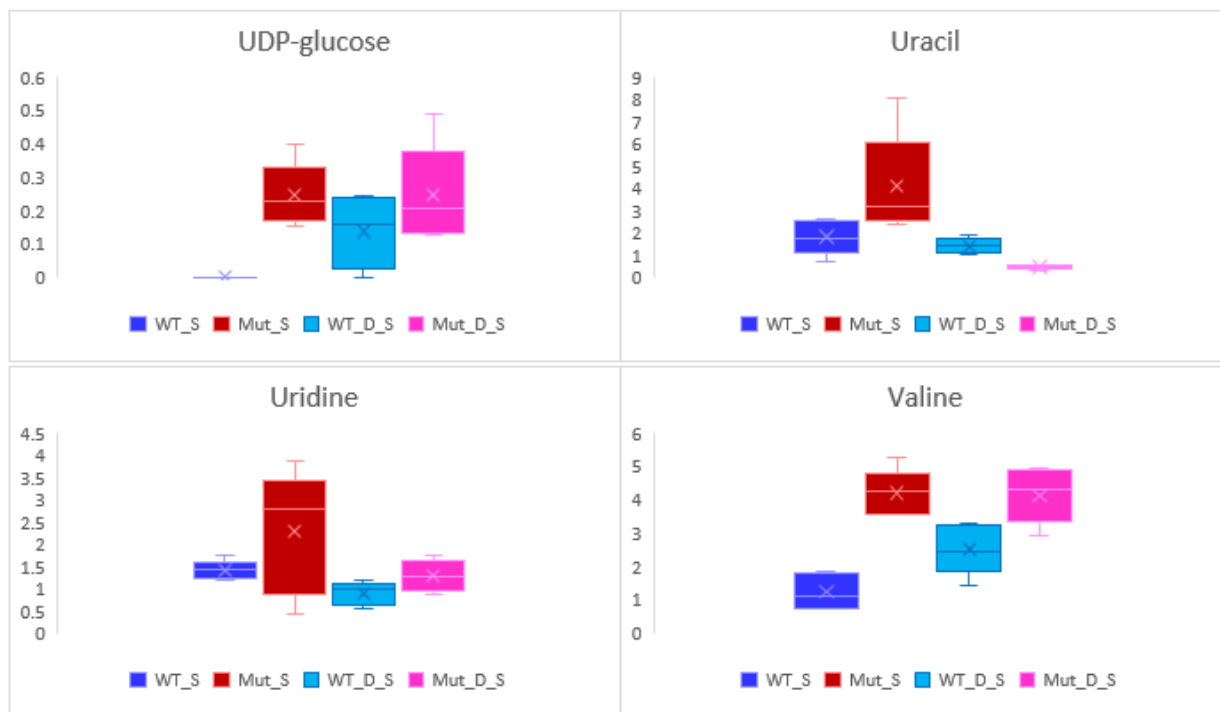

**Figure S38.** Stationary Phase Metabolite Box and Whisker Plots. The ends of the whiskers are the minimum and maximum values, the center line is the median, the x is the mean, and the colored middle “box” encompasses the middle 50% of scores for the group.

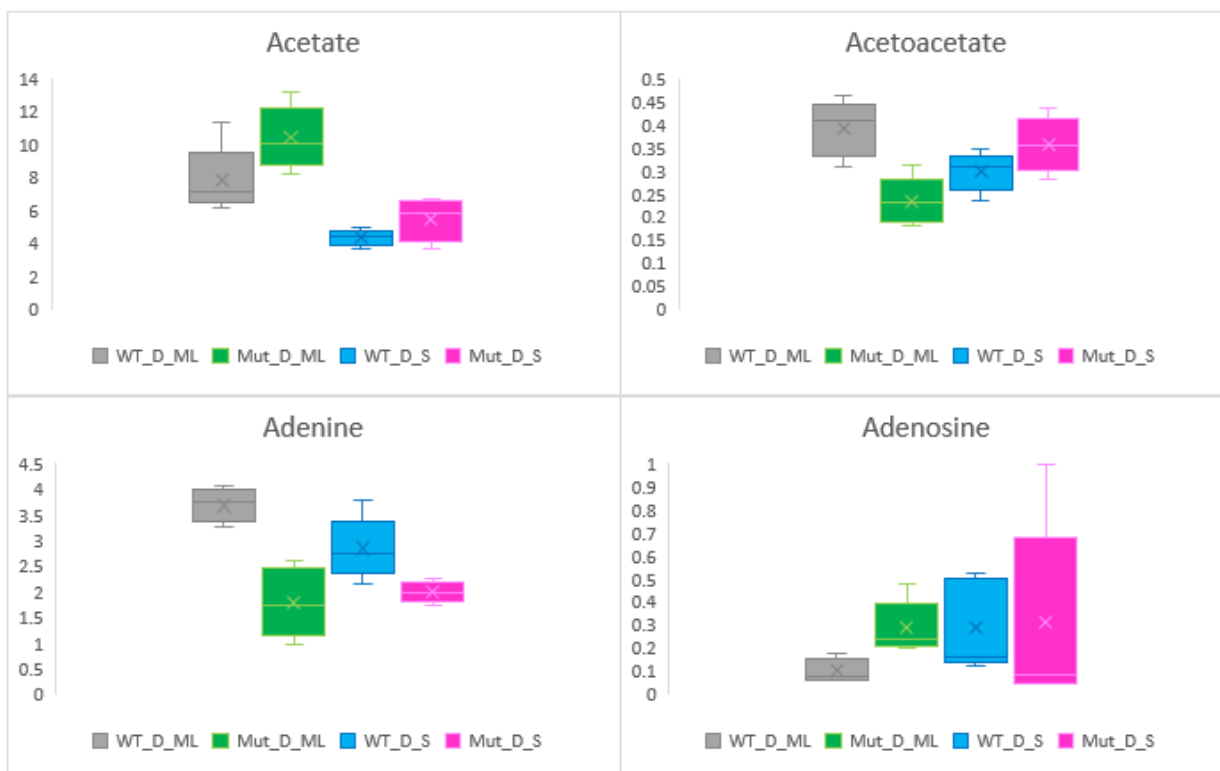

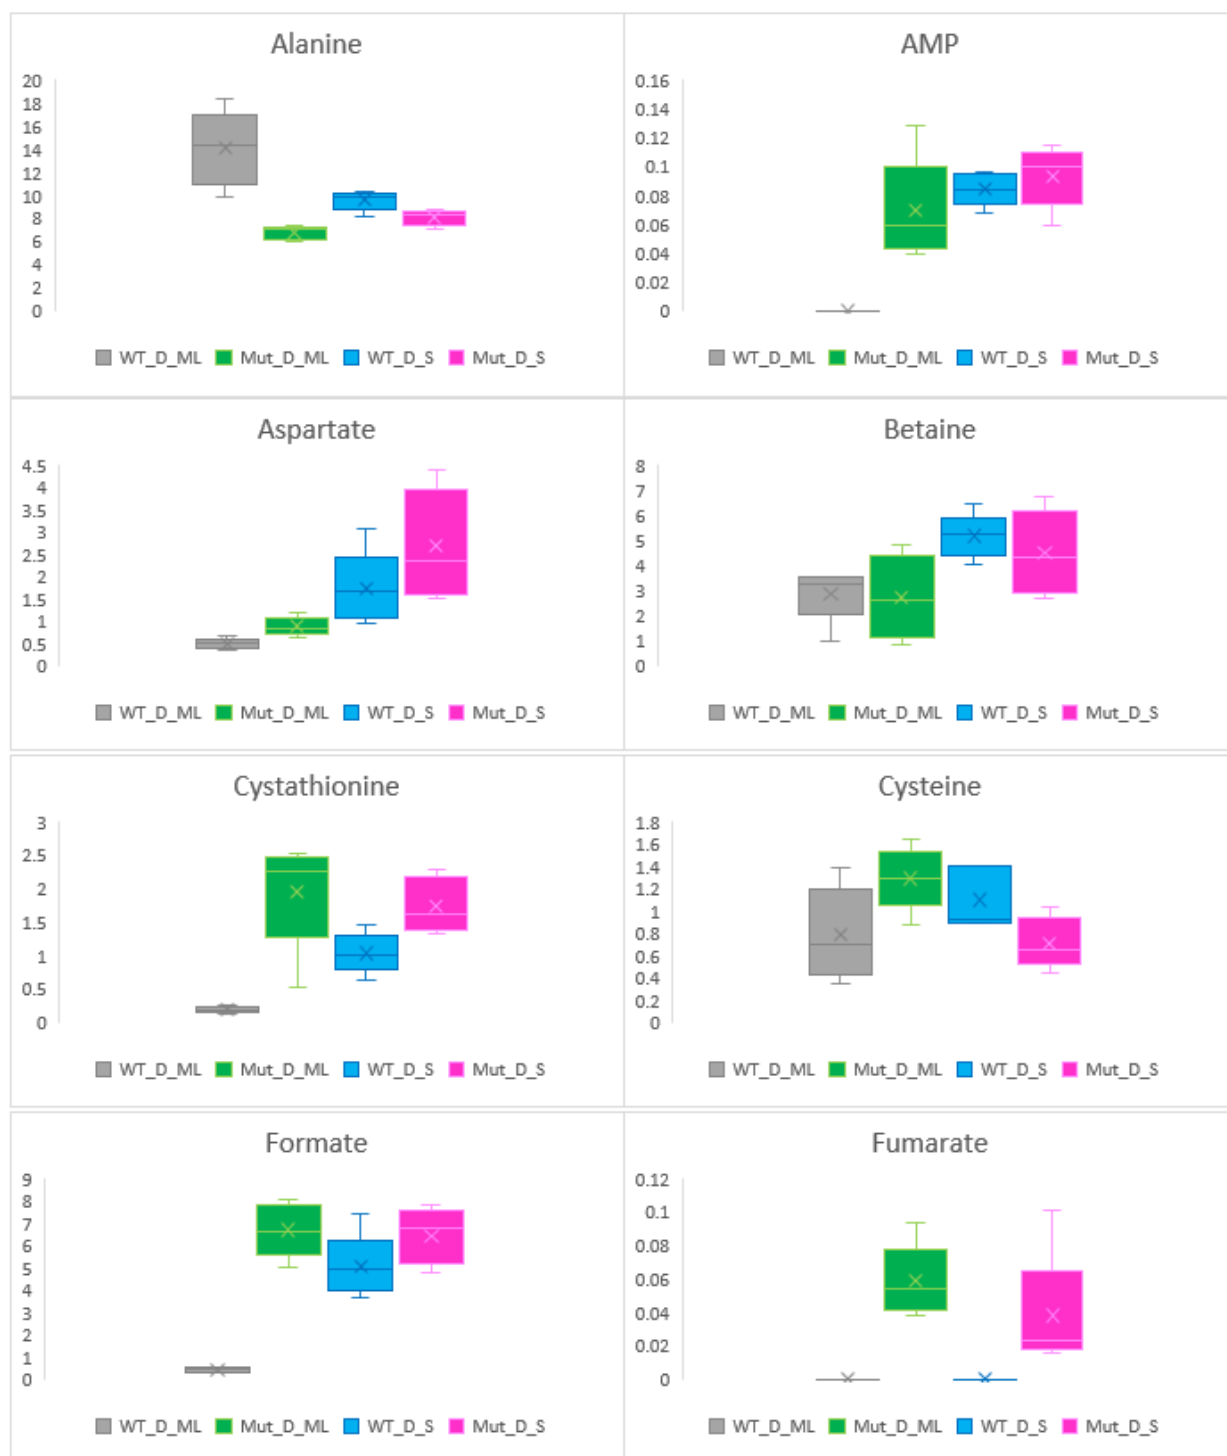

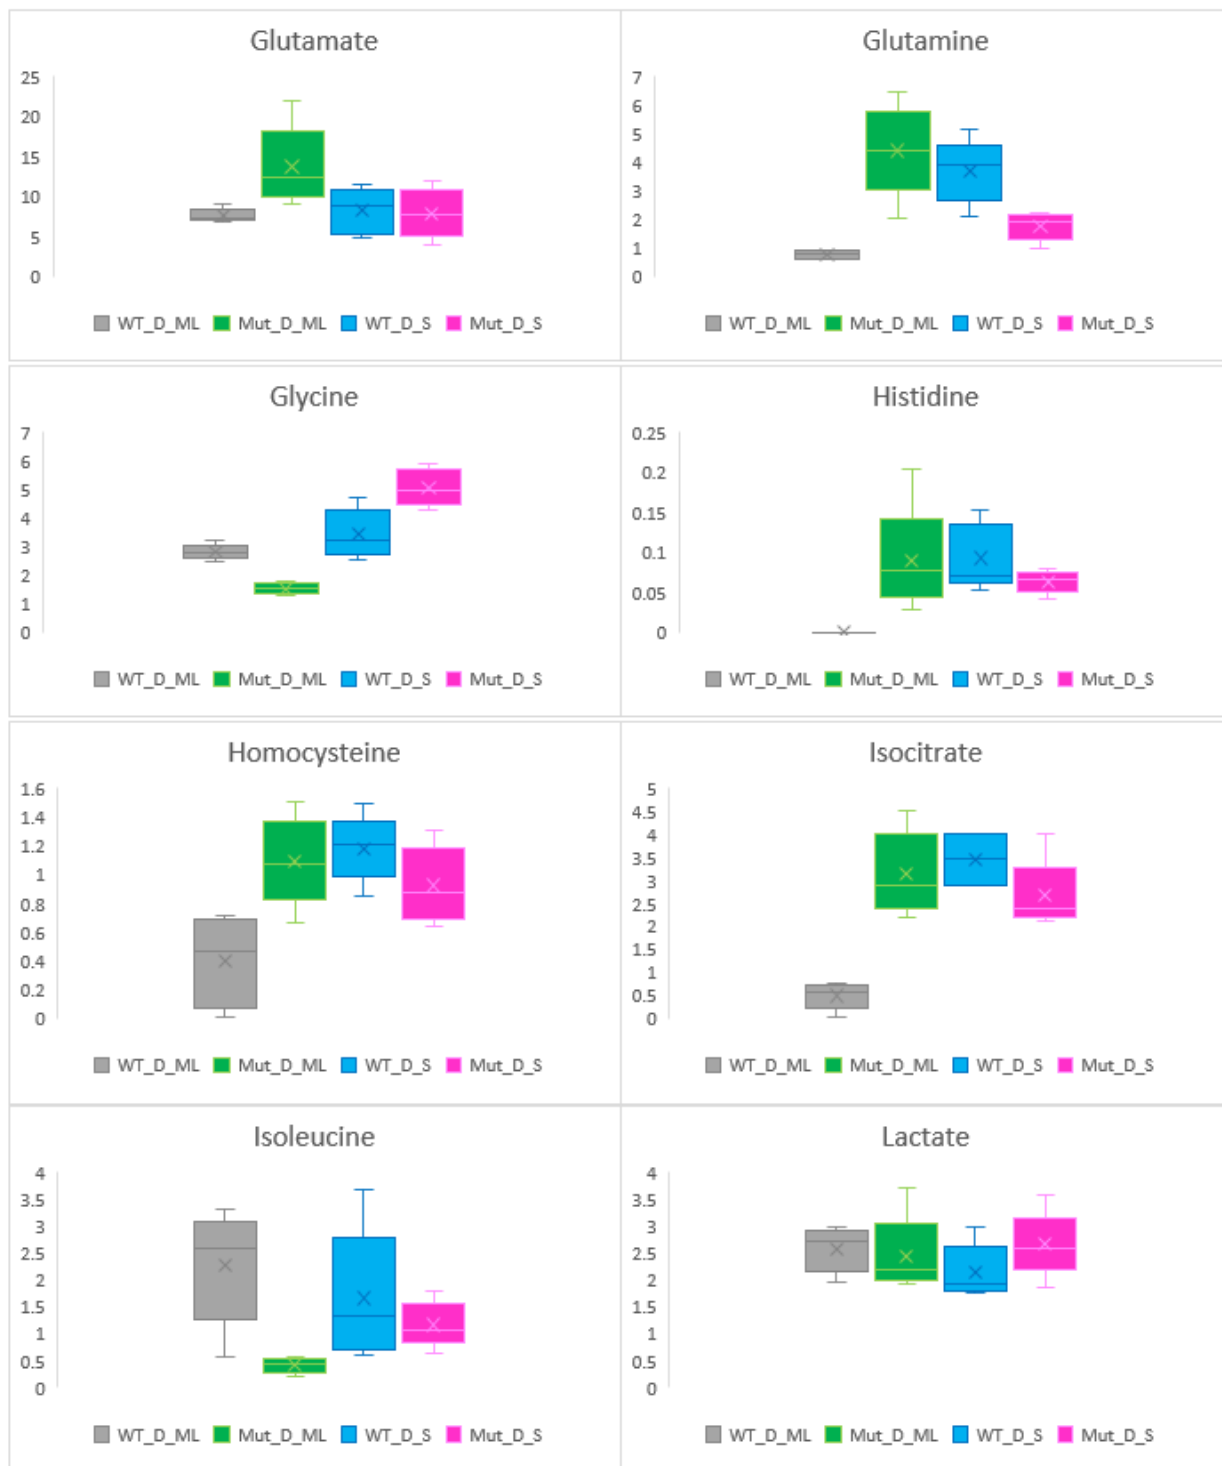

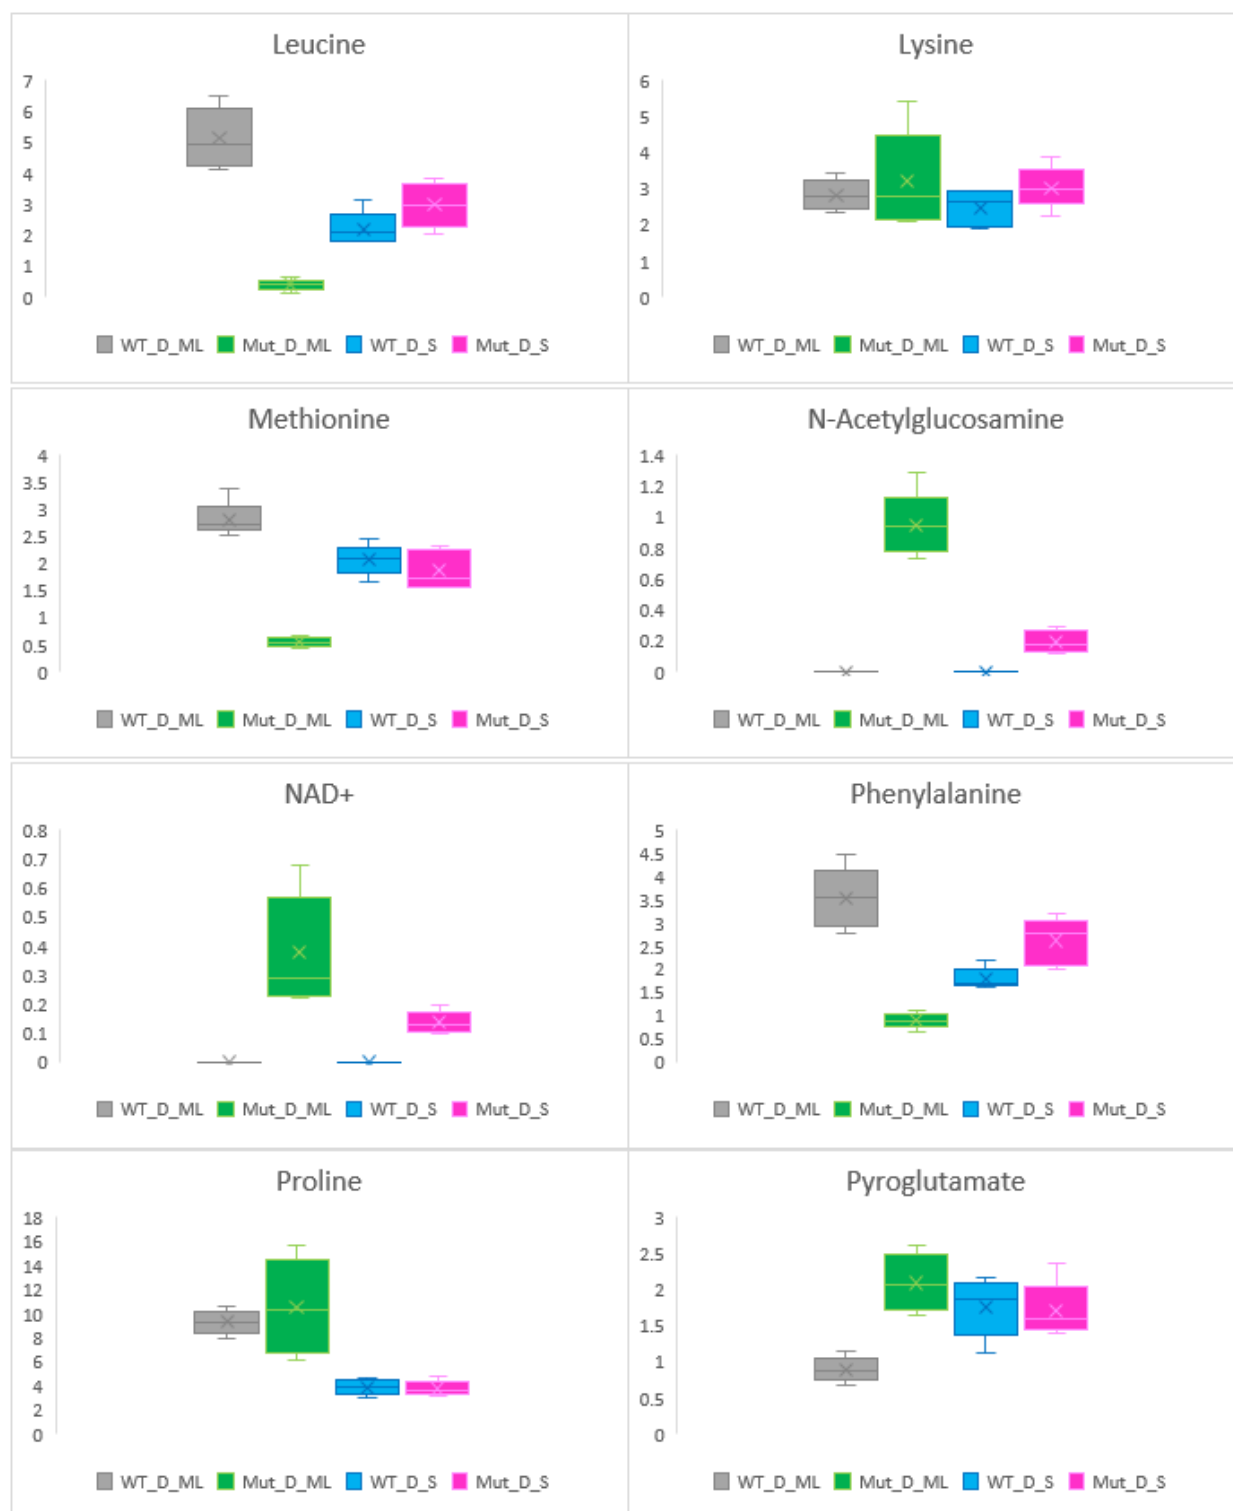

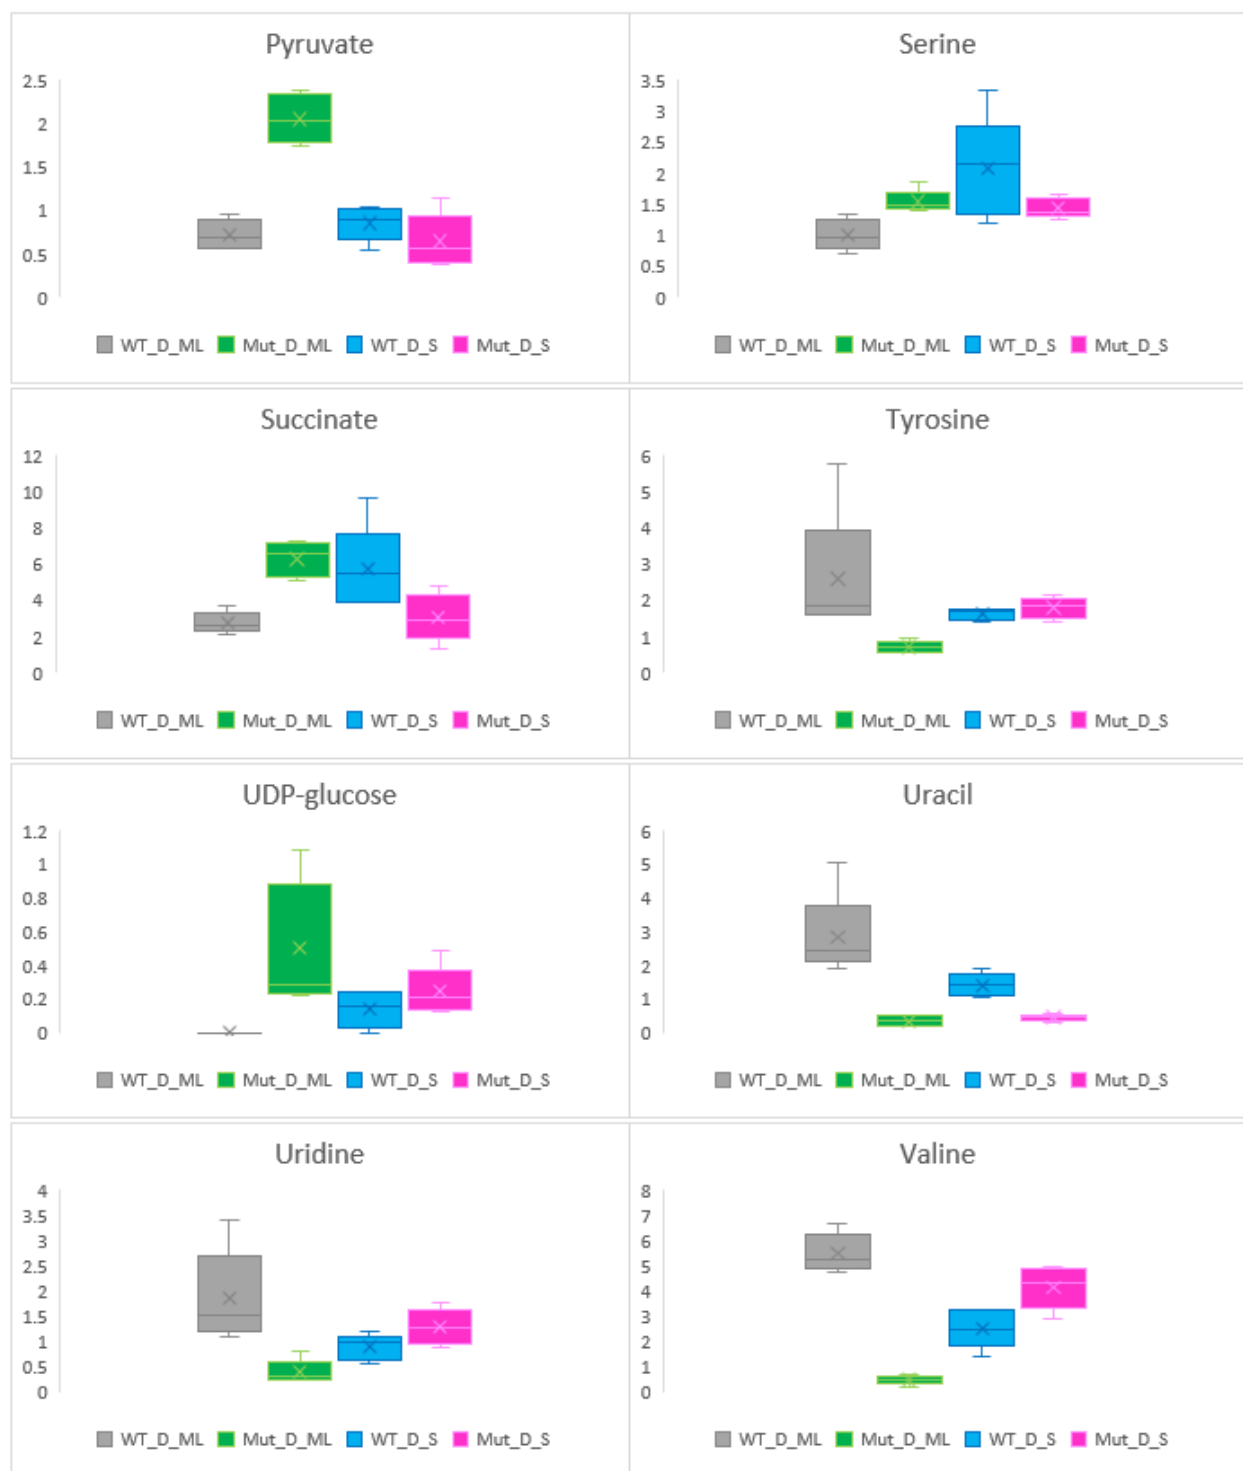

**Figure S39.** Challenged Sample Types Metabolite Box and Whisker Plots. The ends of the whiskers are the minimum and maximum values, the center line is the median, the x is the mean, and the colored middle “box” encompasses the middle 50% of scores for the group.

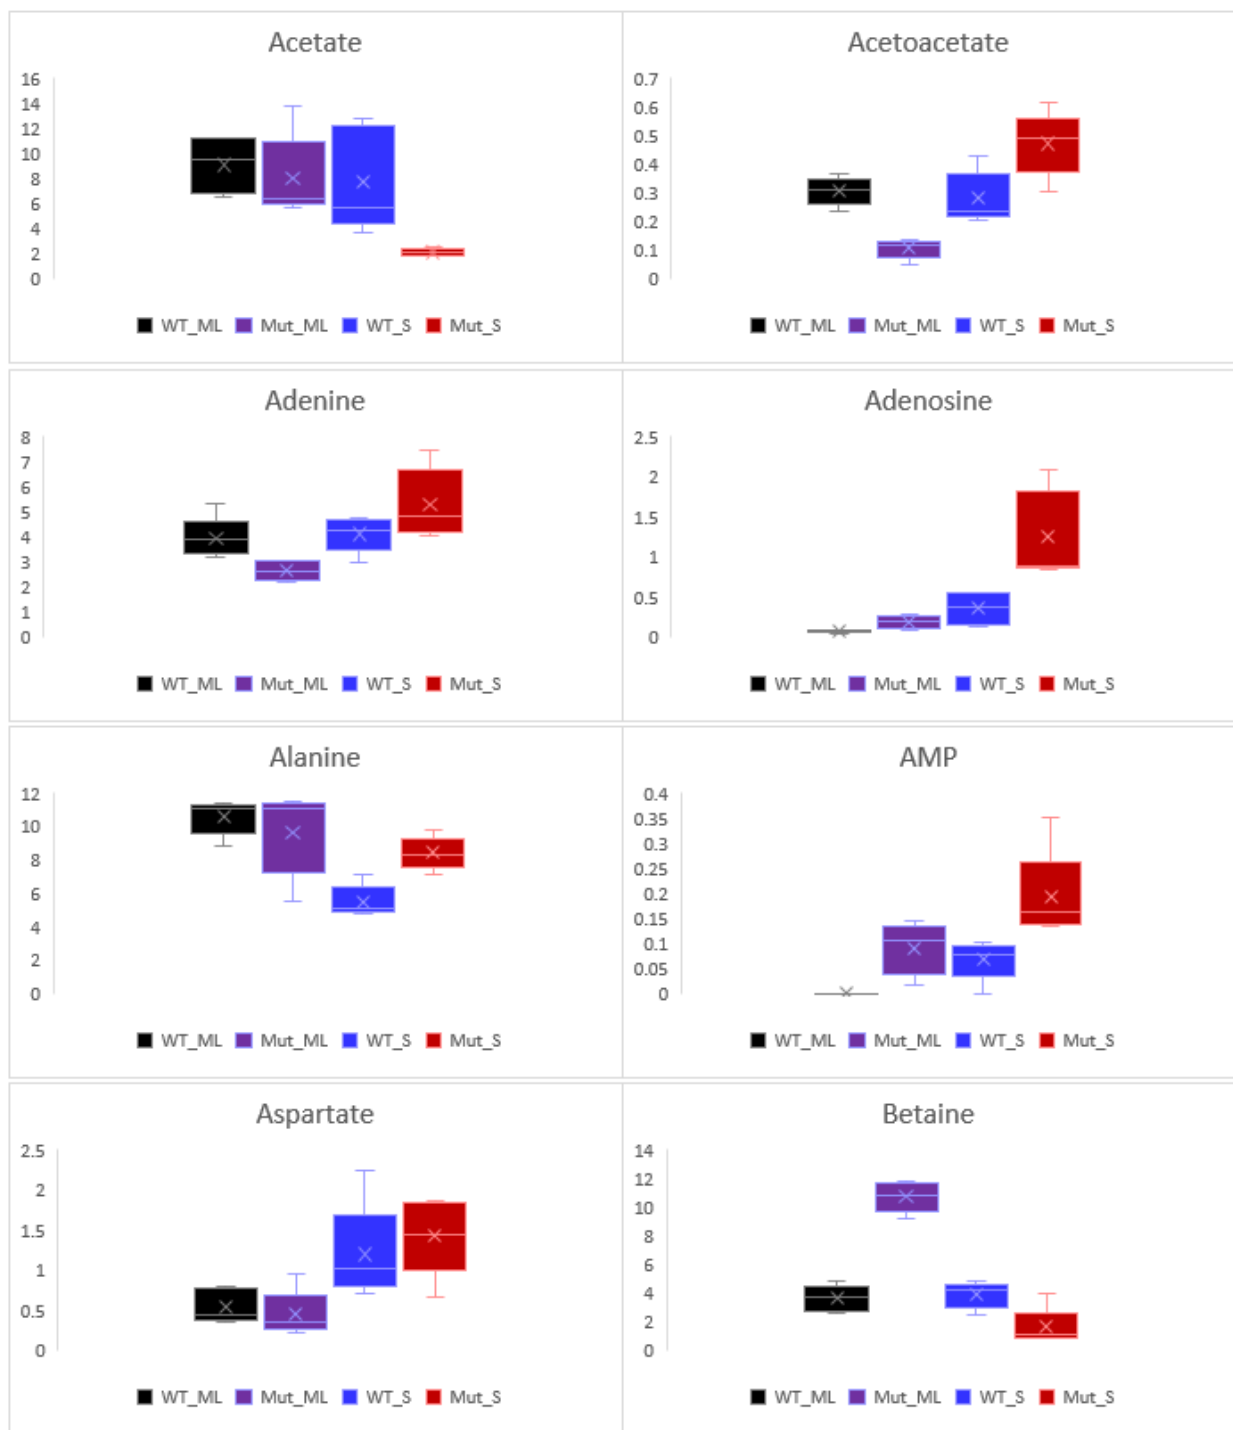

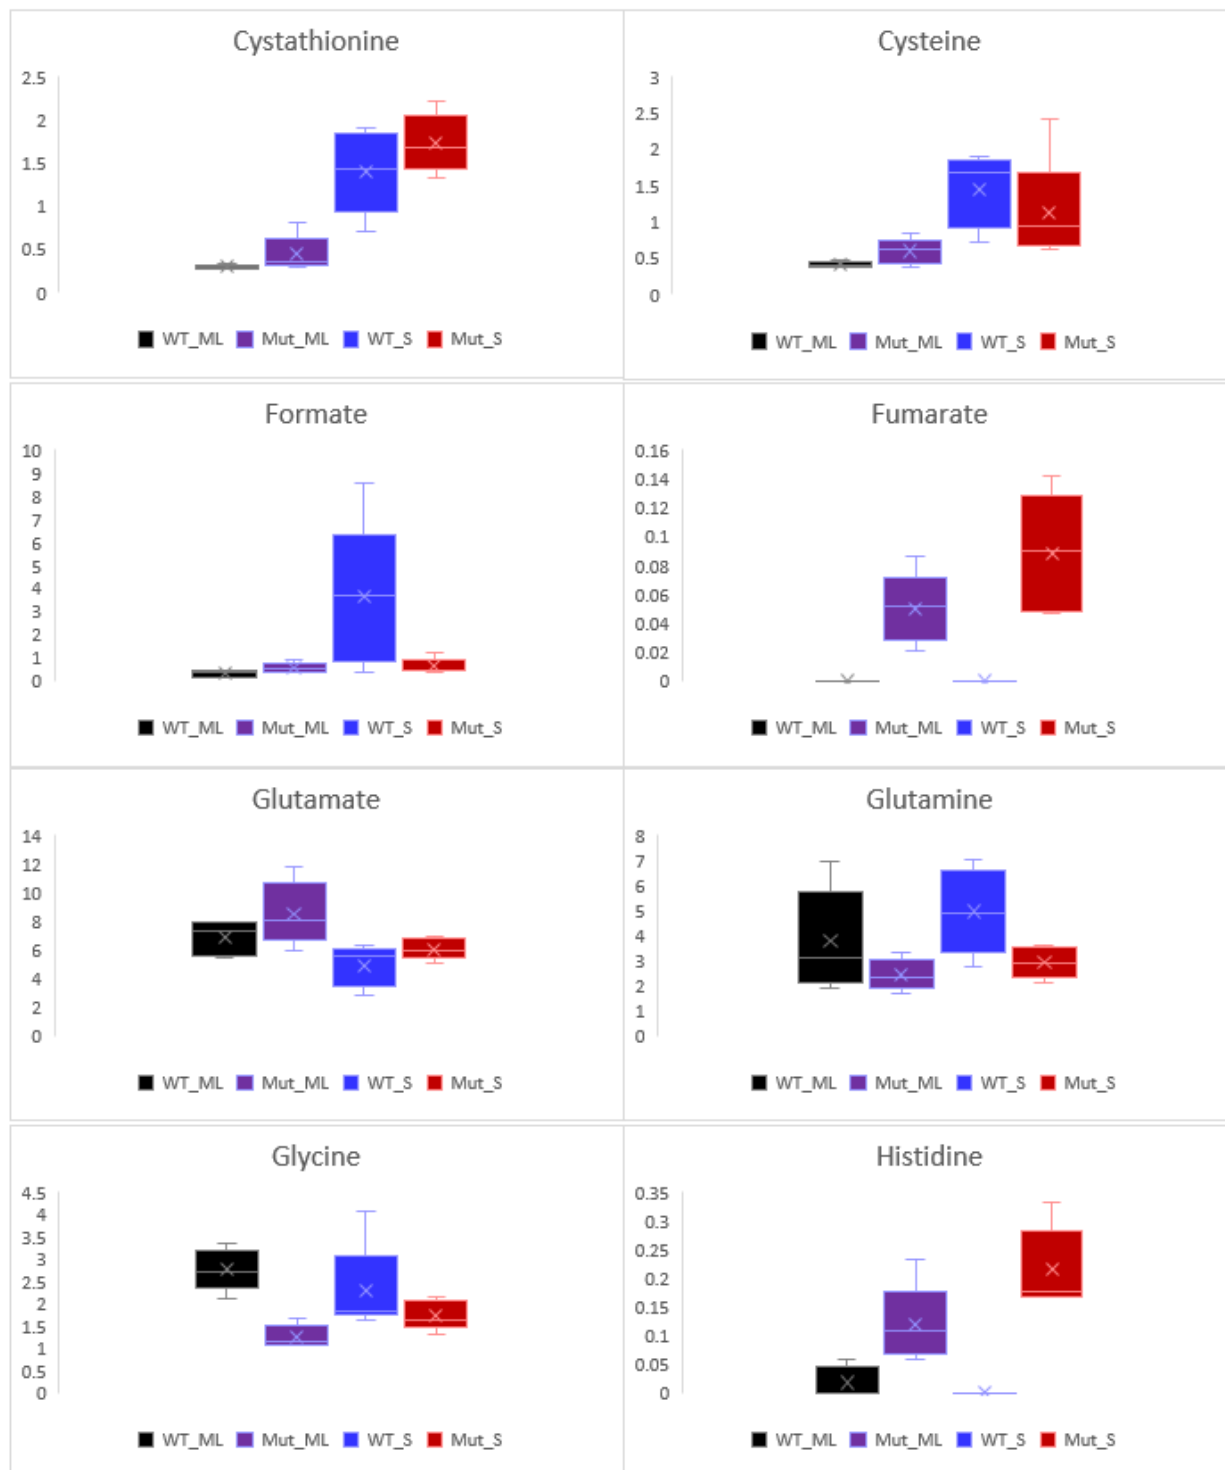

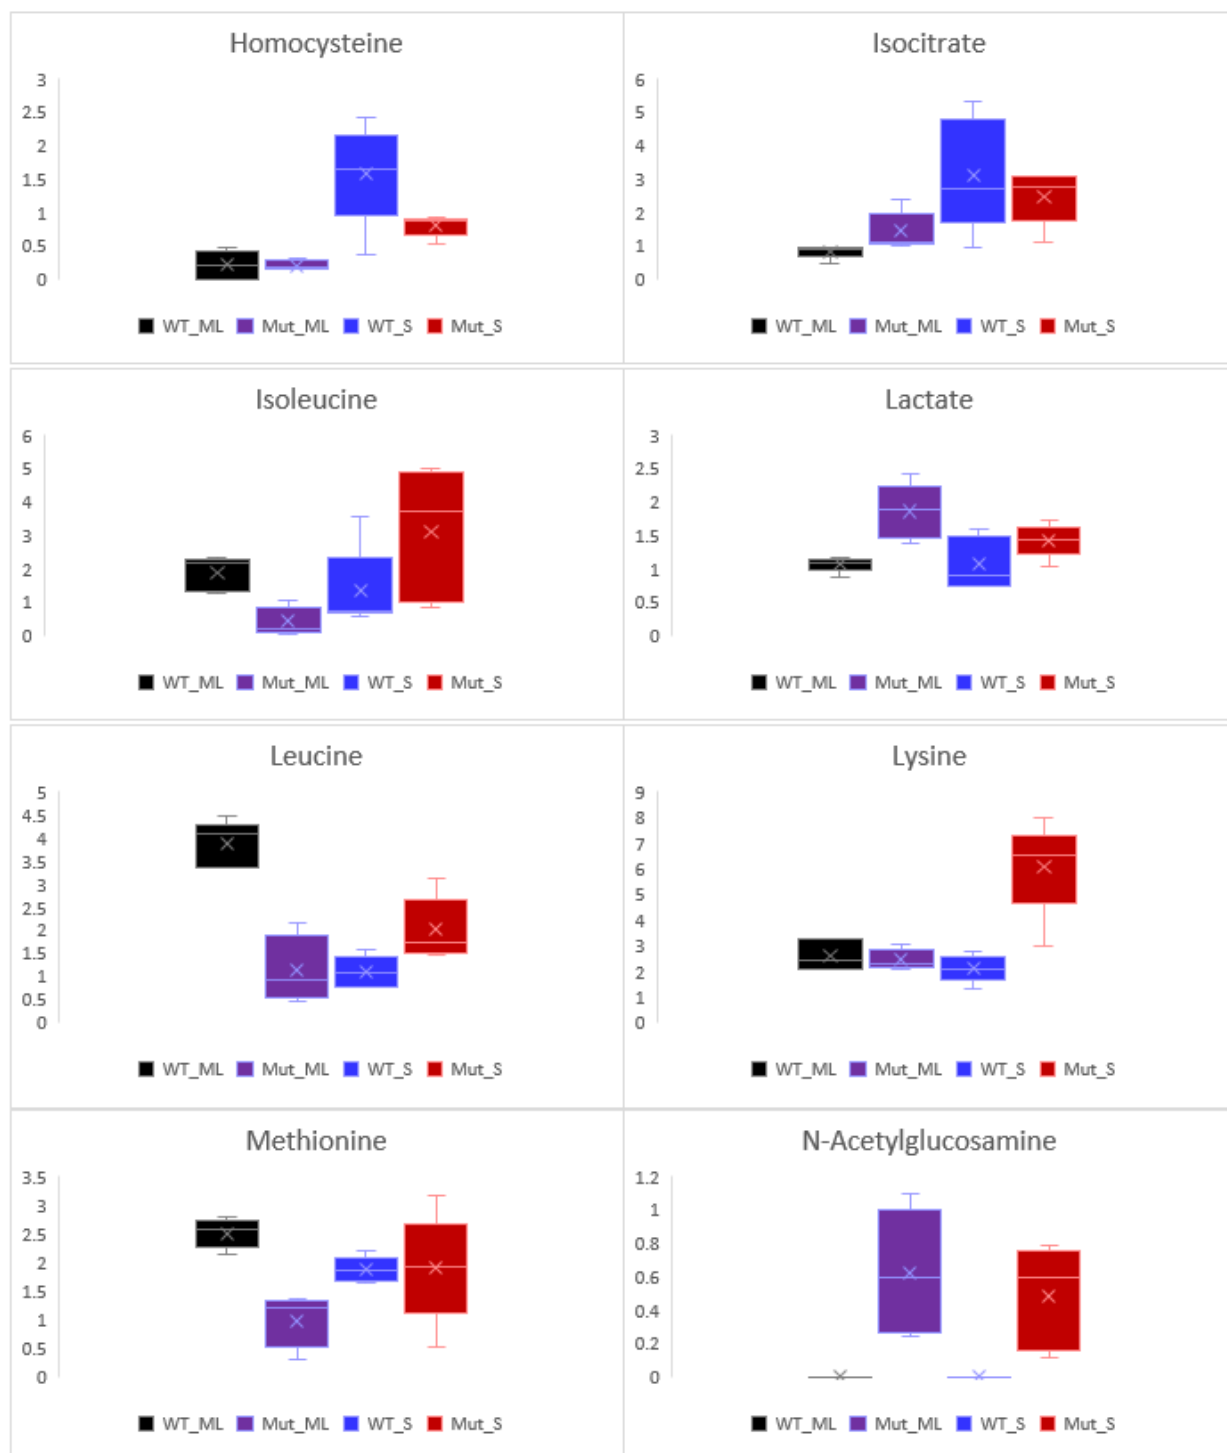



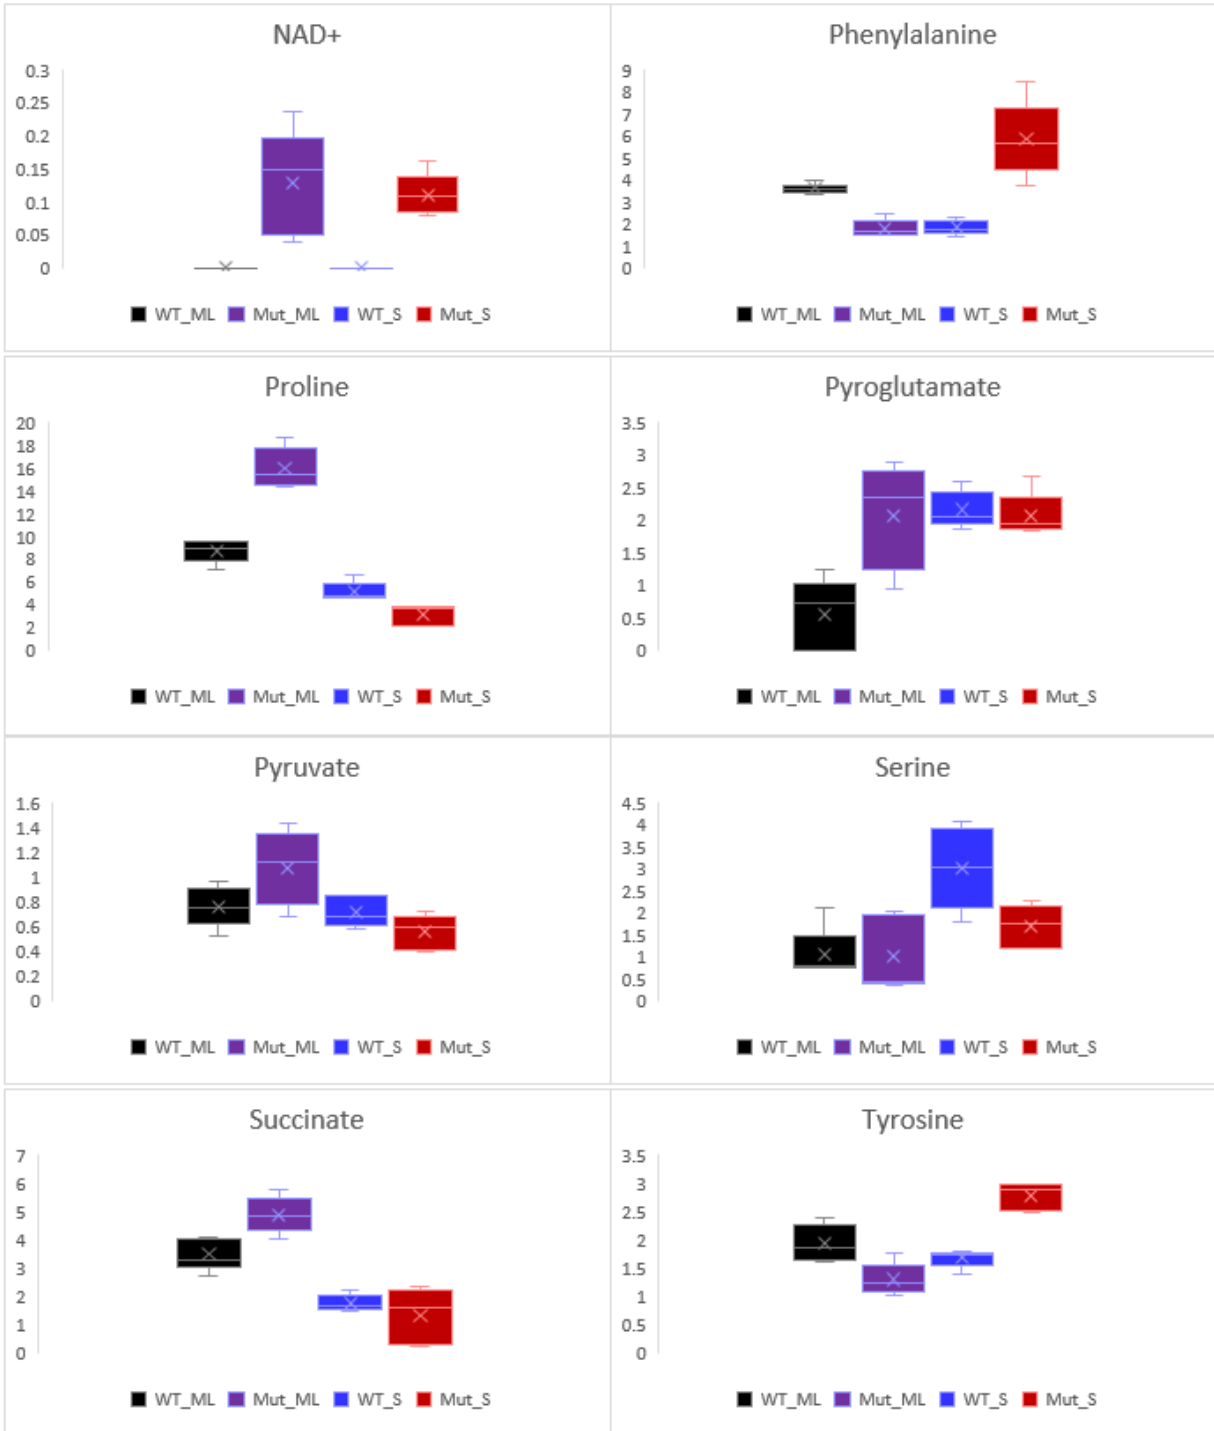

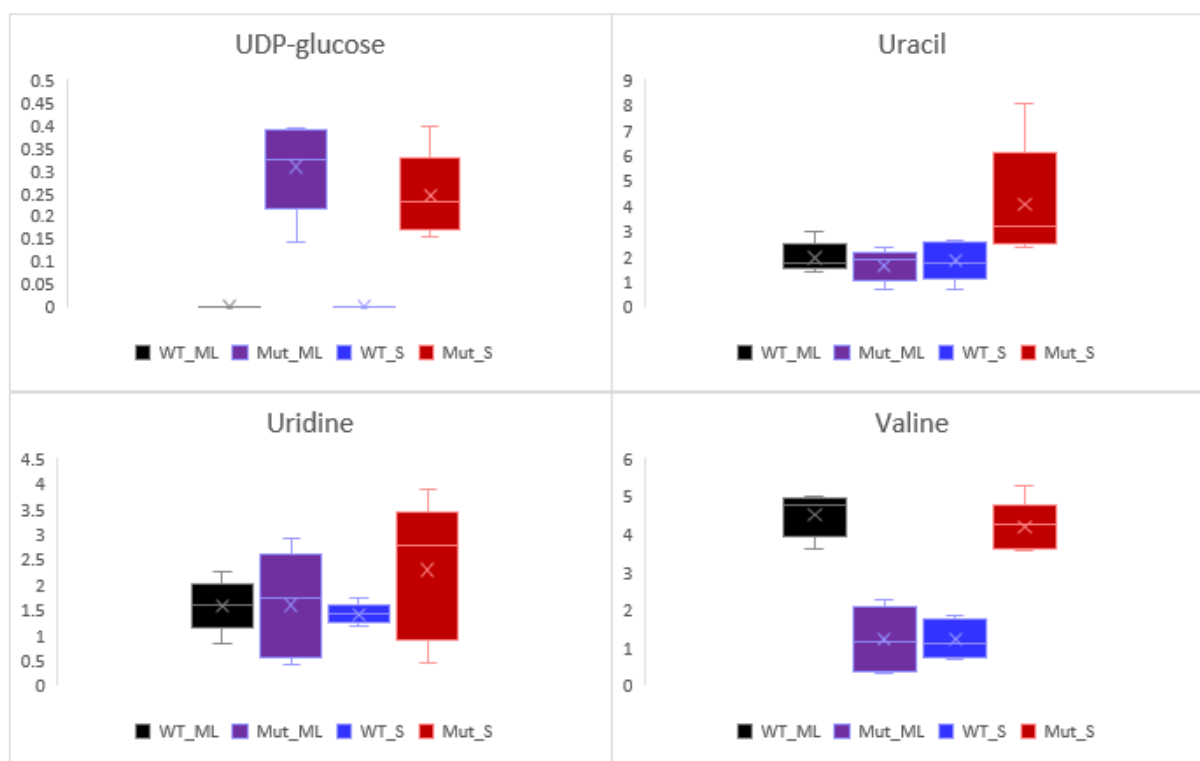

**Figure S40.** Unchallenged Sample Types Metabolite Box and Whisker Plots. The ends of the whiskers are the minimum and maximum values, the center line is the median, the x is the mean, and the colored middle “box” encompasses the middle 50% of scores for the group.

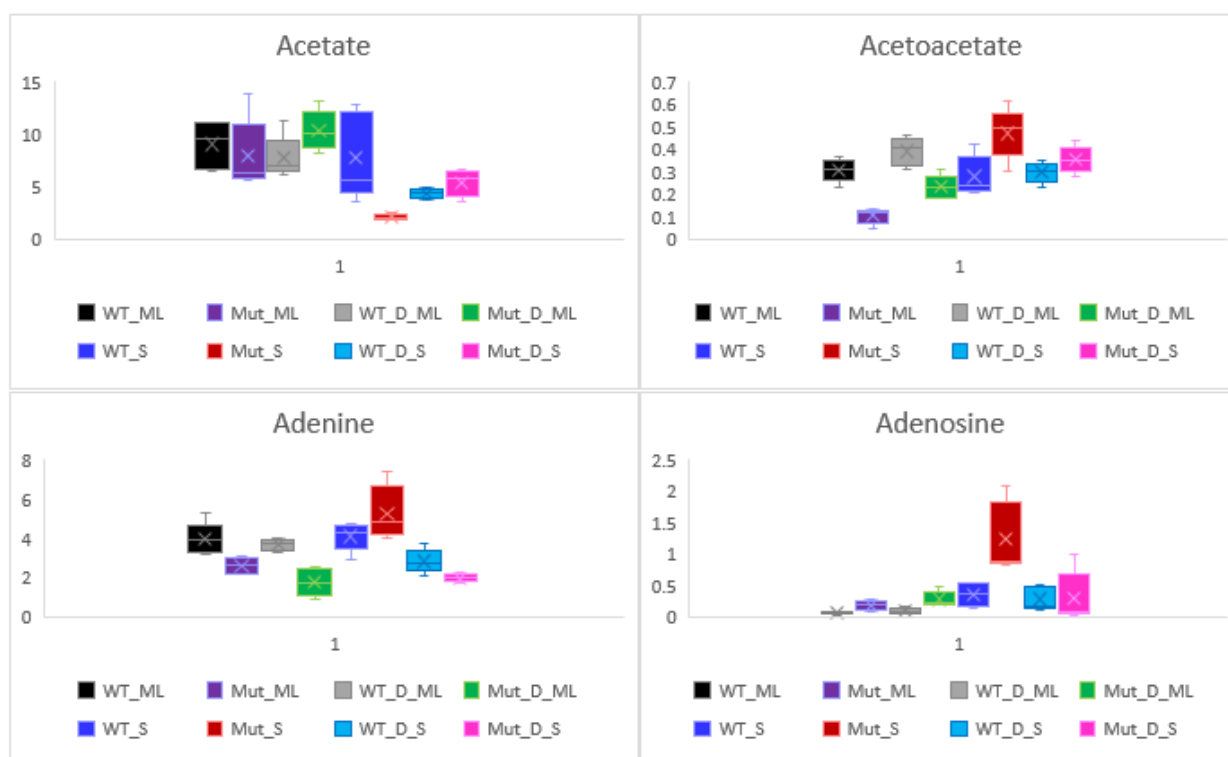

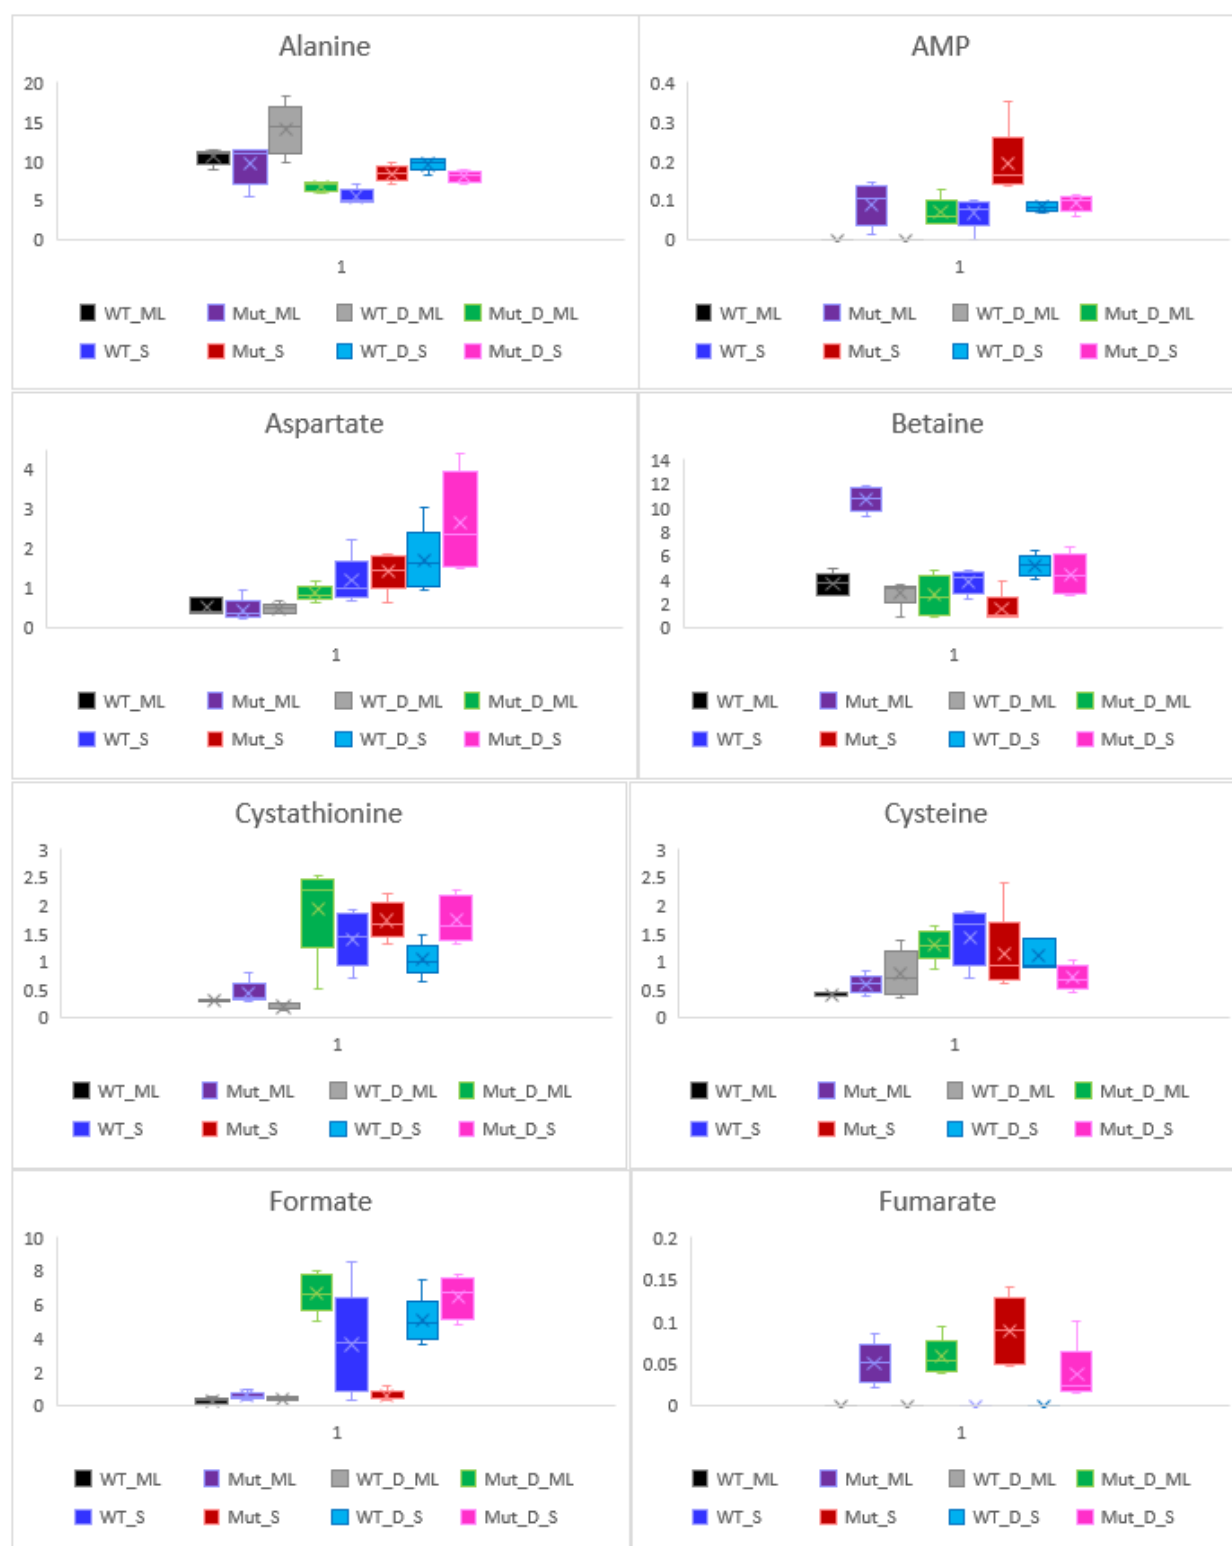

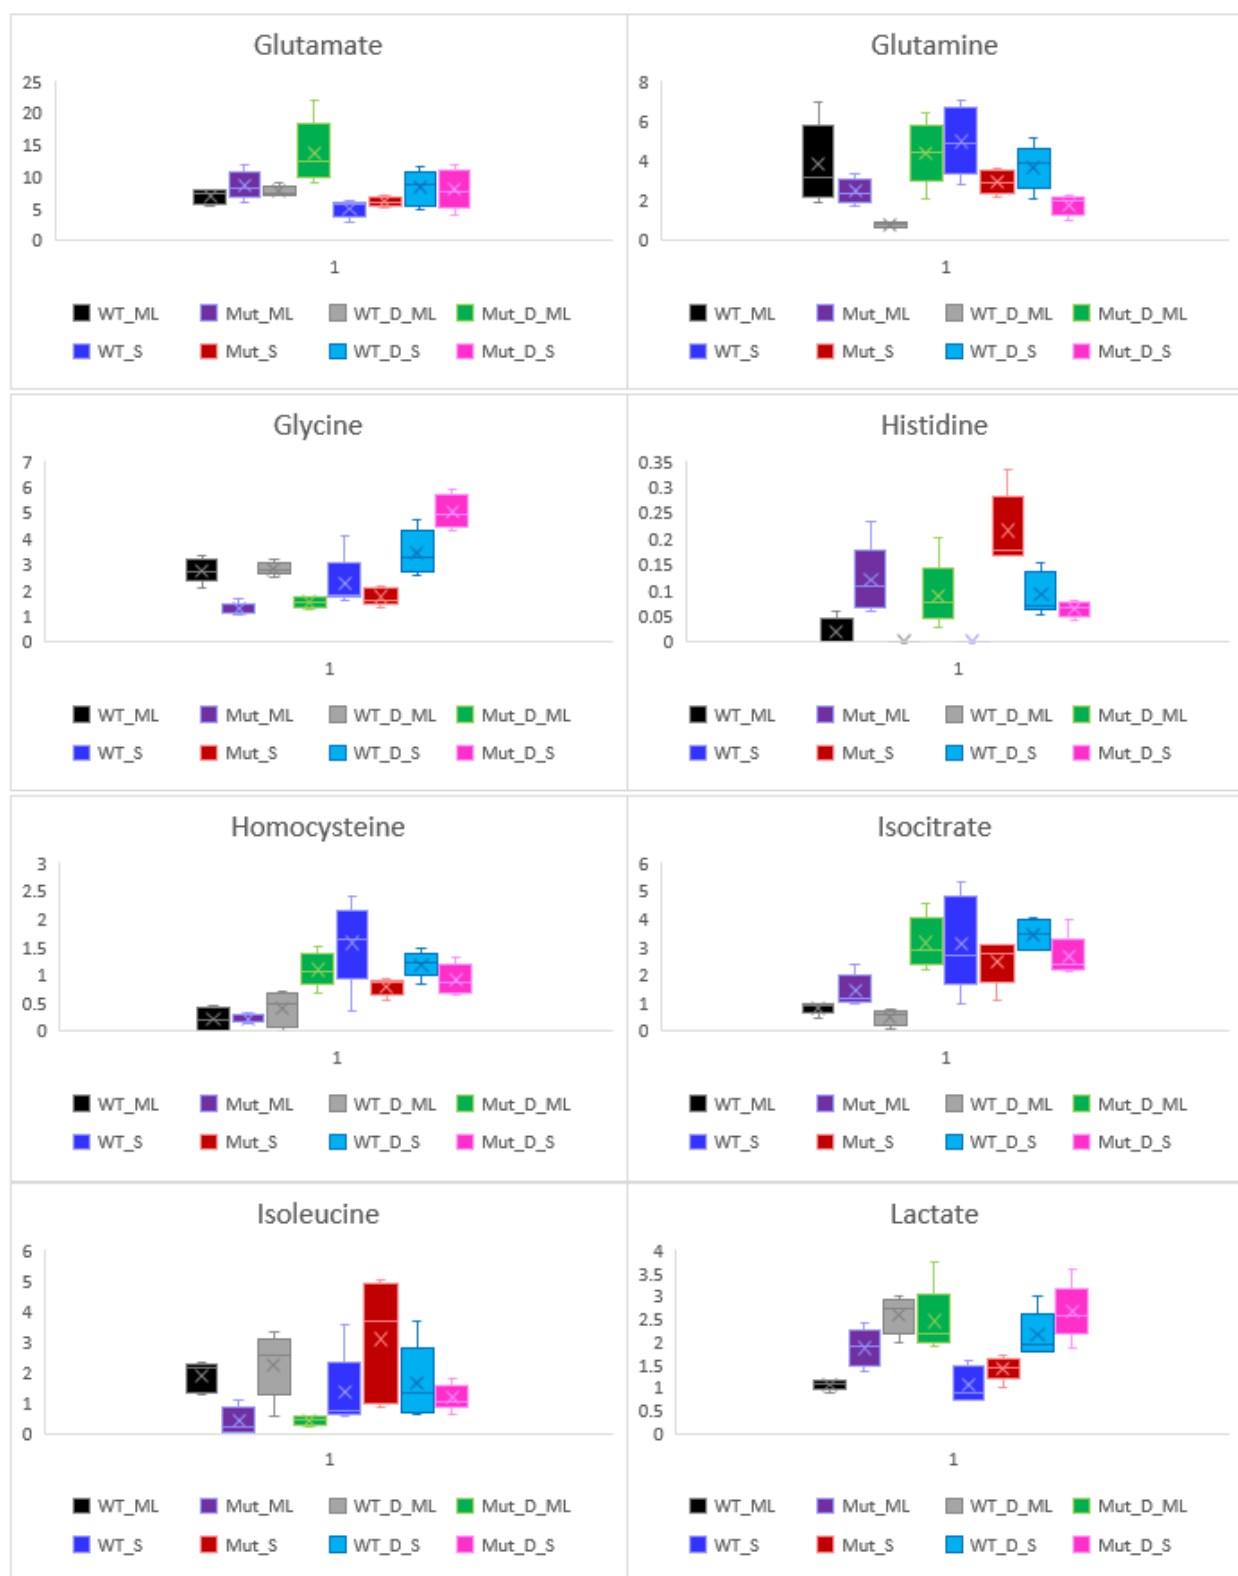

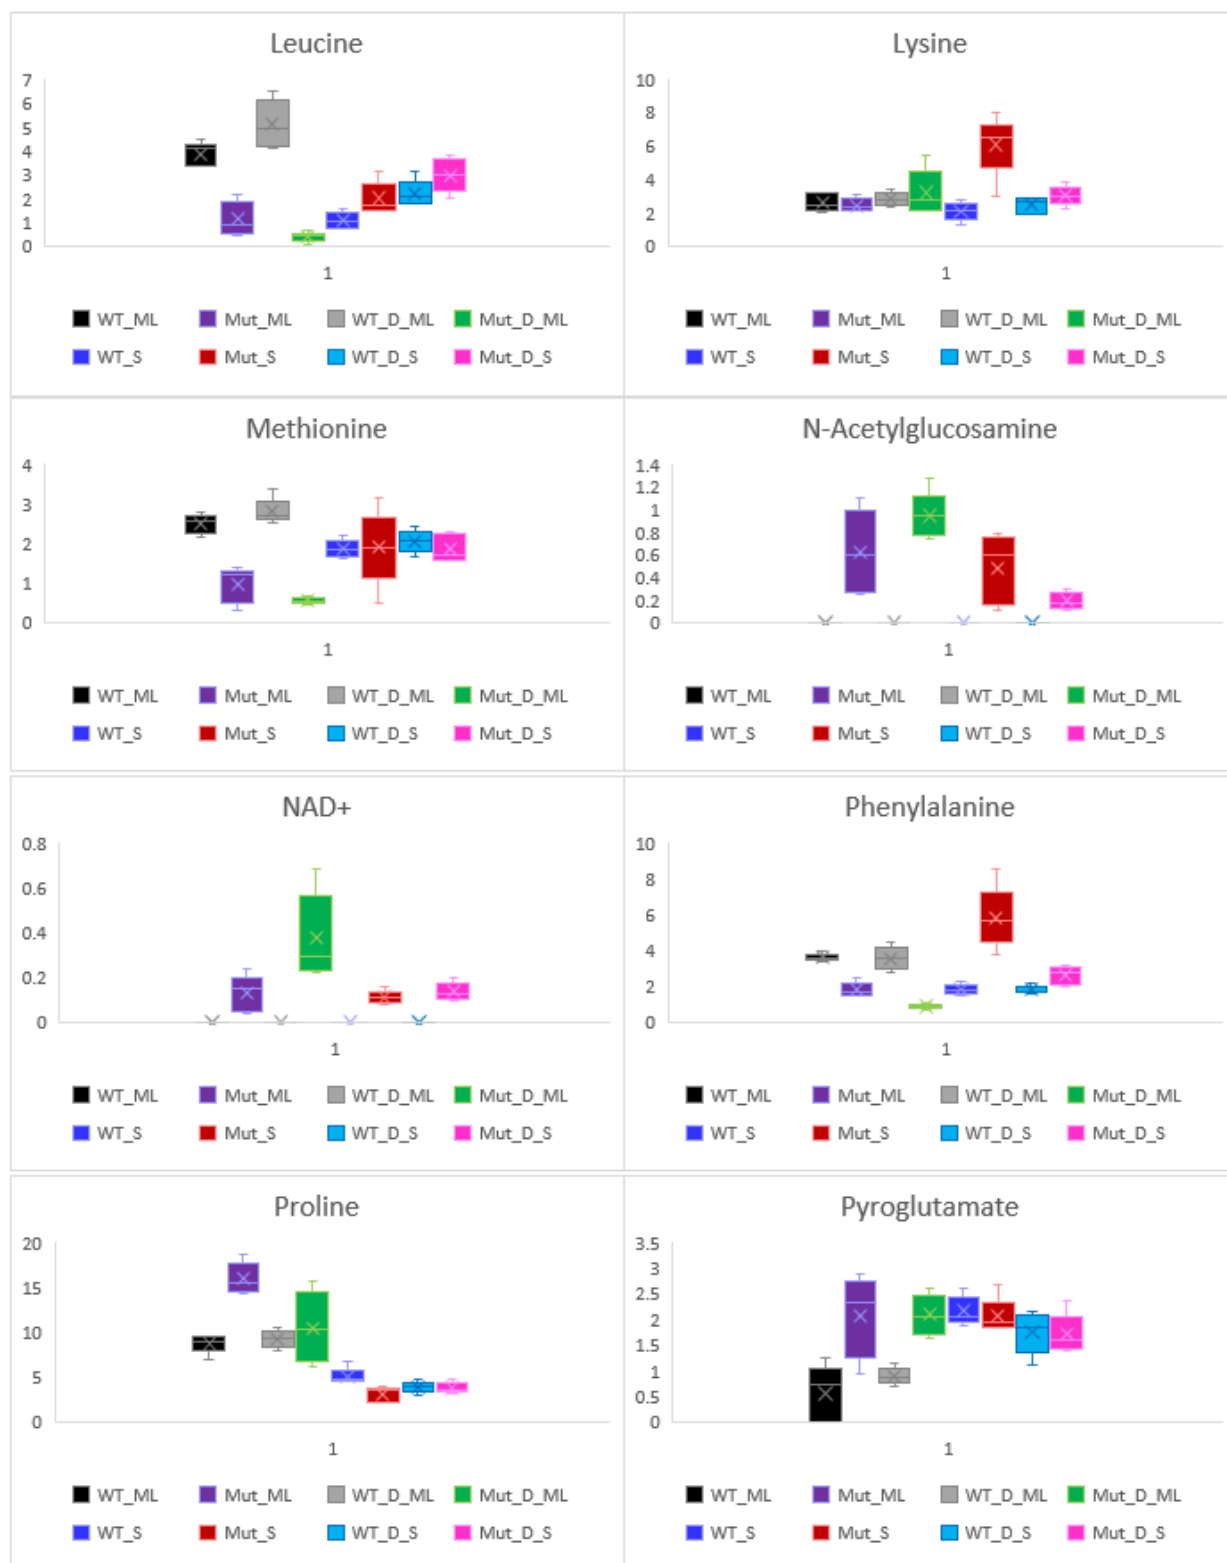

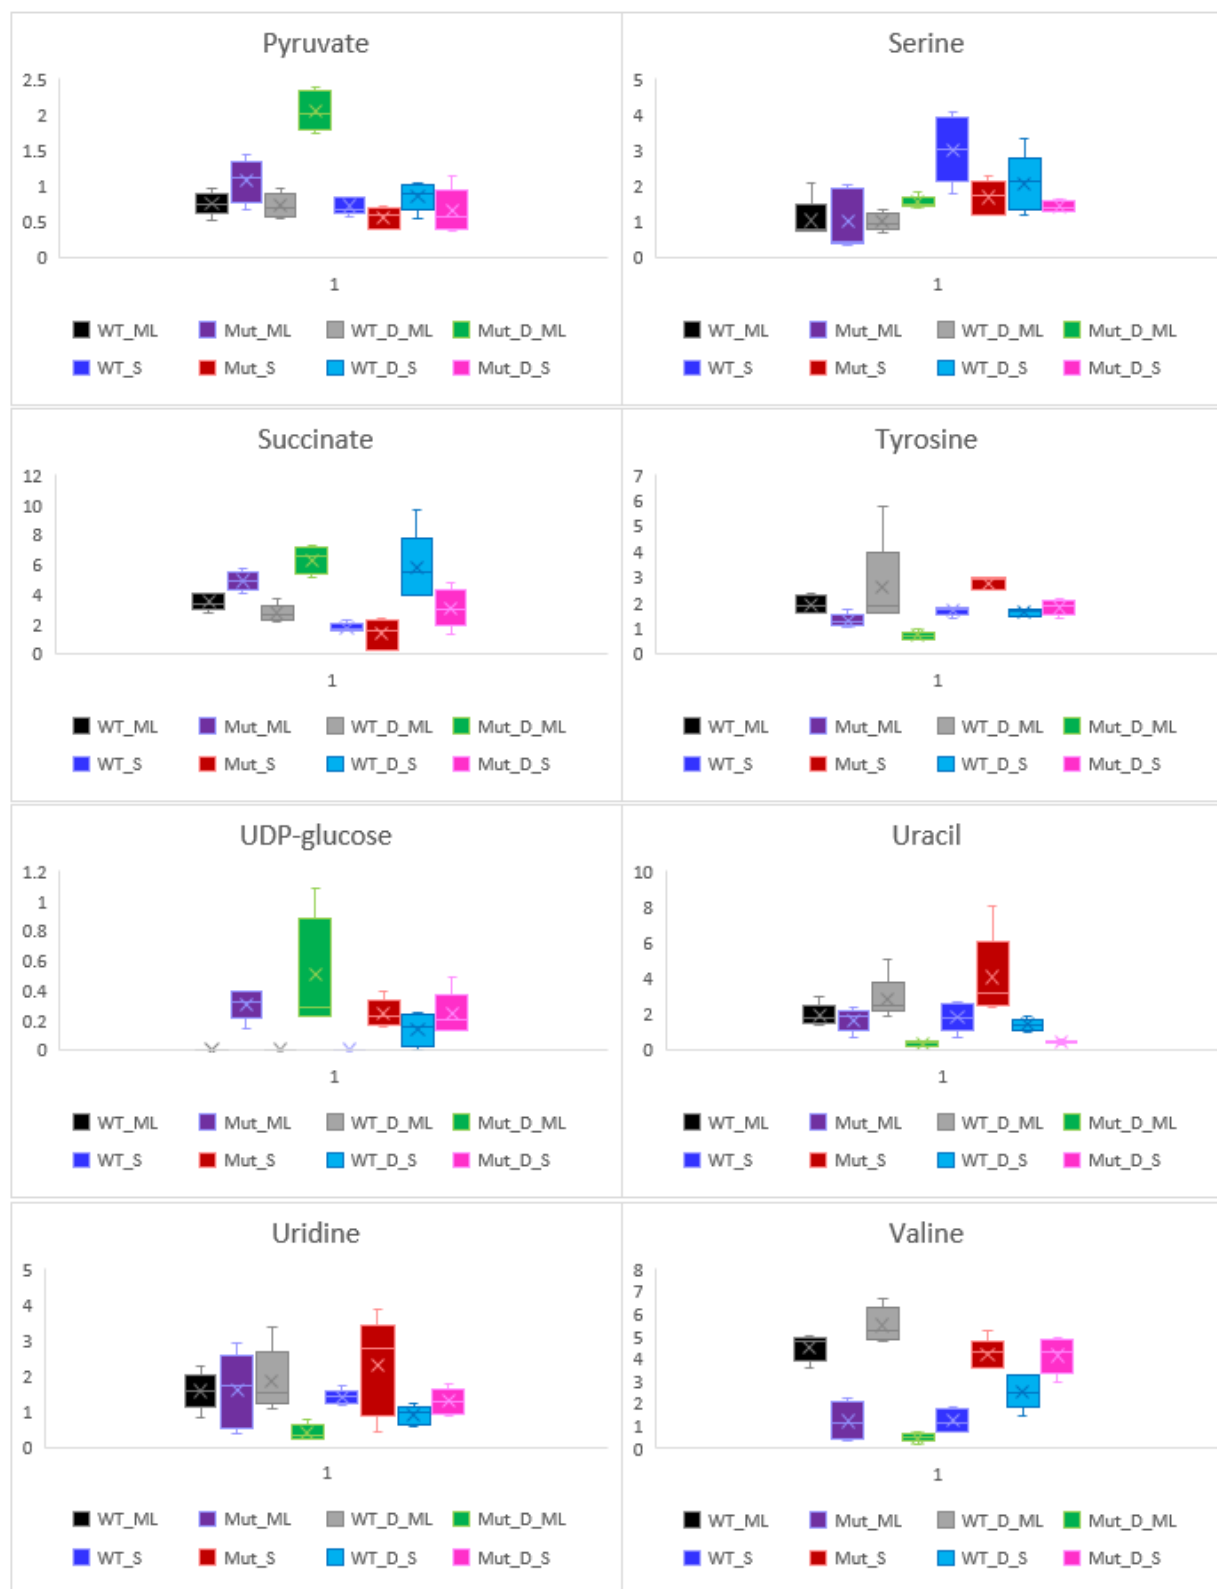

**Figure S41.** All Sample Types Metabolite Box and Whisker Plots. The ends of the whiskers are the minimum and maximum values, the center line is the median, the x is the mean, and the colored middle “box” encompasses the middle 50% of scores for the group.

## References

- Ammons, MC. B., Tripet, B. P., Carlson, R. P., Kirker, K. R., Gross, M. A., Stanisich, J. J., Copié, V. Quantitative NMR Metabolite Profiling of Methicillin-Resistant and Methicillin-Susceptible *Staphylococcus aureus* Discriminates between Biofilm and Planktonic Phenotypes. *J. Proteome Res.* **2014**, *13*, 2973–2985.
- Aries, M.L., Cloninger, M.J. NMR Metabolomic Analysis of Bacterial Resistance Pathways Using Multivalent Quaternary Ammonium Functionalized Macromolecules. *Metabolomics* **2020**, *16*, 1–11. doi.org/10.1007/s11306-020-01702-1
- Wang, N. S. [Online] Experiment No. 9 °C Measurements of Cell Biomass Concentration. Department of Chemical and Biomolecular Engineering, University of Maryland, MD. <http://www.eng.umd.edu/~nsw/ench485/lab9c.htm>. (accessed 24 November 2019).
